# Supplementary material
Source: publisher figshare collection journal article supplement (https://tandf.figshare.com/ndownloader/files/22643576)

**Interaction of 1-acylamino-2,2-dichloro-ethenyltriphenylphosphonium chlorides with alkanolamines**

**O.V. Golovchenkoa, E.R. Abdurakhmanovaa, S.O. Vladimirov b, M.Y. Brusnakova, T.O. Krupoderc, E.B. Rusanovd, R. N.Vydzhaka, V.S. Brovaretsa***

*aV. P. Kukhar Institute of Bioorganic Chemistry and Petrochemistry of the National Academy of Sciences of Ukraine, 1 Murmanska str., 02094, Kyiv-94, Ukraine;*

*bTaras Shevchenko National University of Kyiv, 64 Volodymyrska str., Kyiv, Ukraine;*

*cNizhyn Mykola Gogol State University, 2 Grafska str., 16600, Nizhyn, Chernihivska Oblast, Ukraine;*

*dInstitute of Organic Chemistry of the National Academy of Sciences of Ukraine,*

*5 Murmanska str., 02660, Kyiv, Ukraine.*

Email: brovarets@bpci.kiev.ua


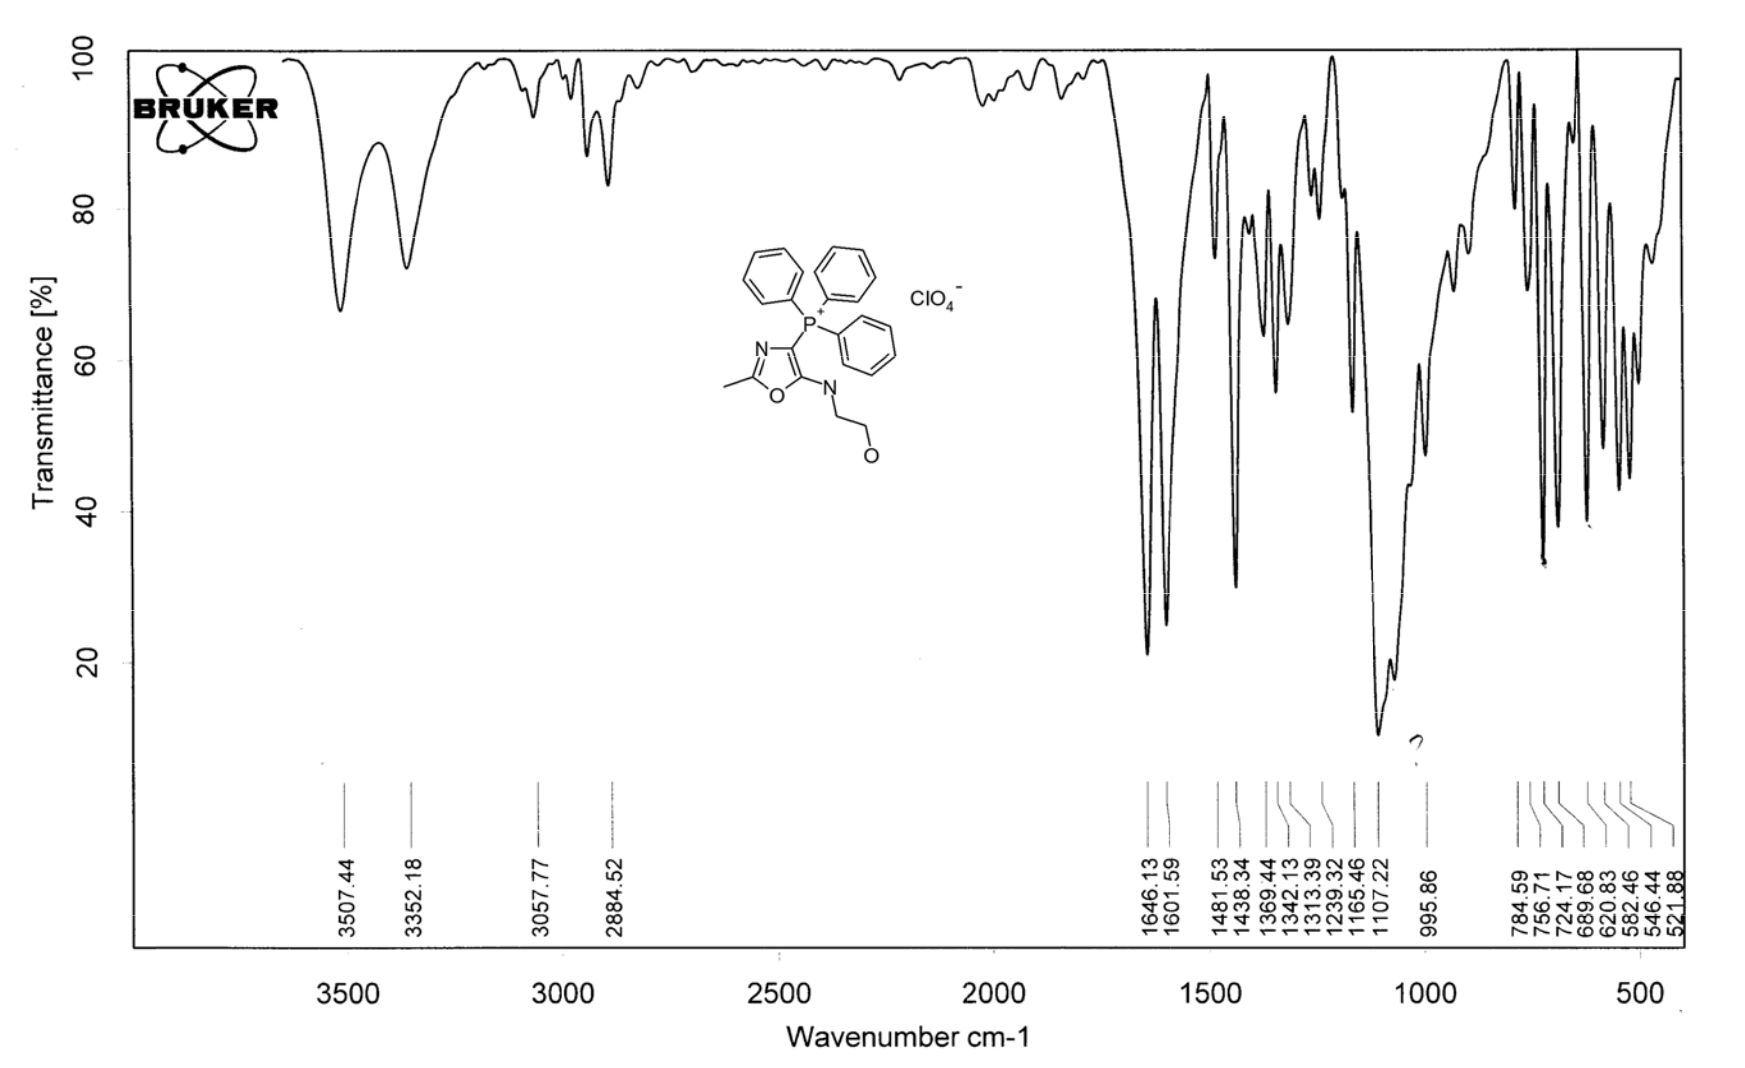


**Figure S 1.** IR (KBr) spectra of [5-(2-Hydroxyethyl)amino-2-methyl-4-oxazolyl]triphenylphosphonium perchlorate **(3a)**.


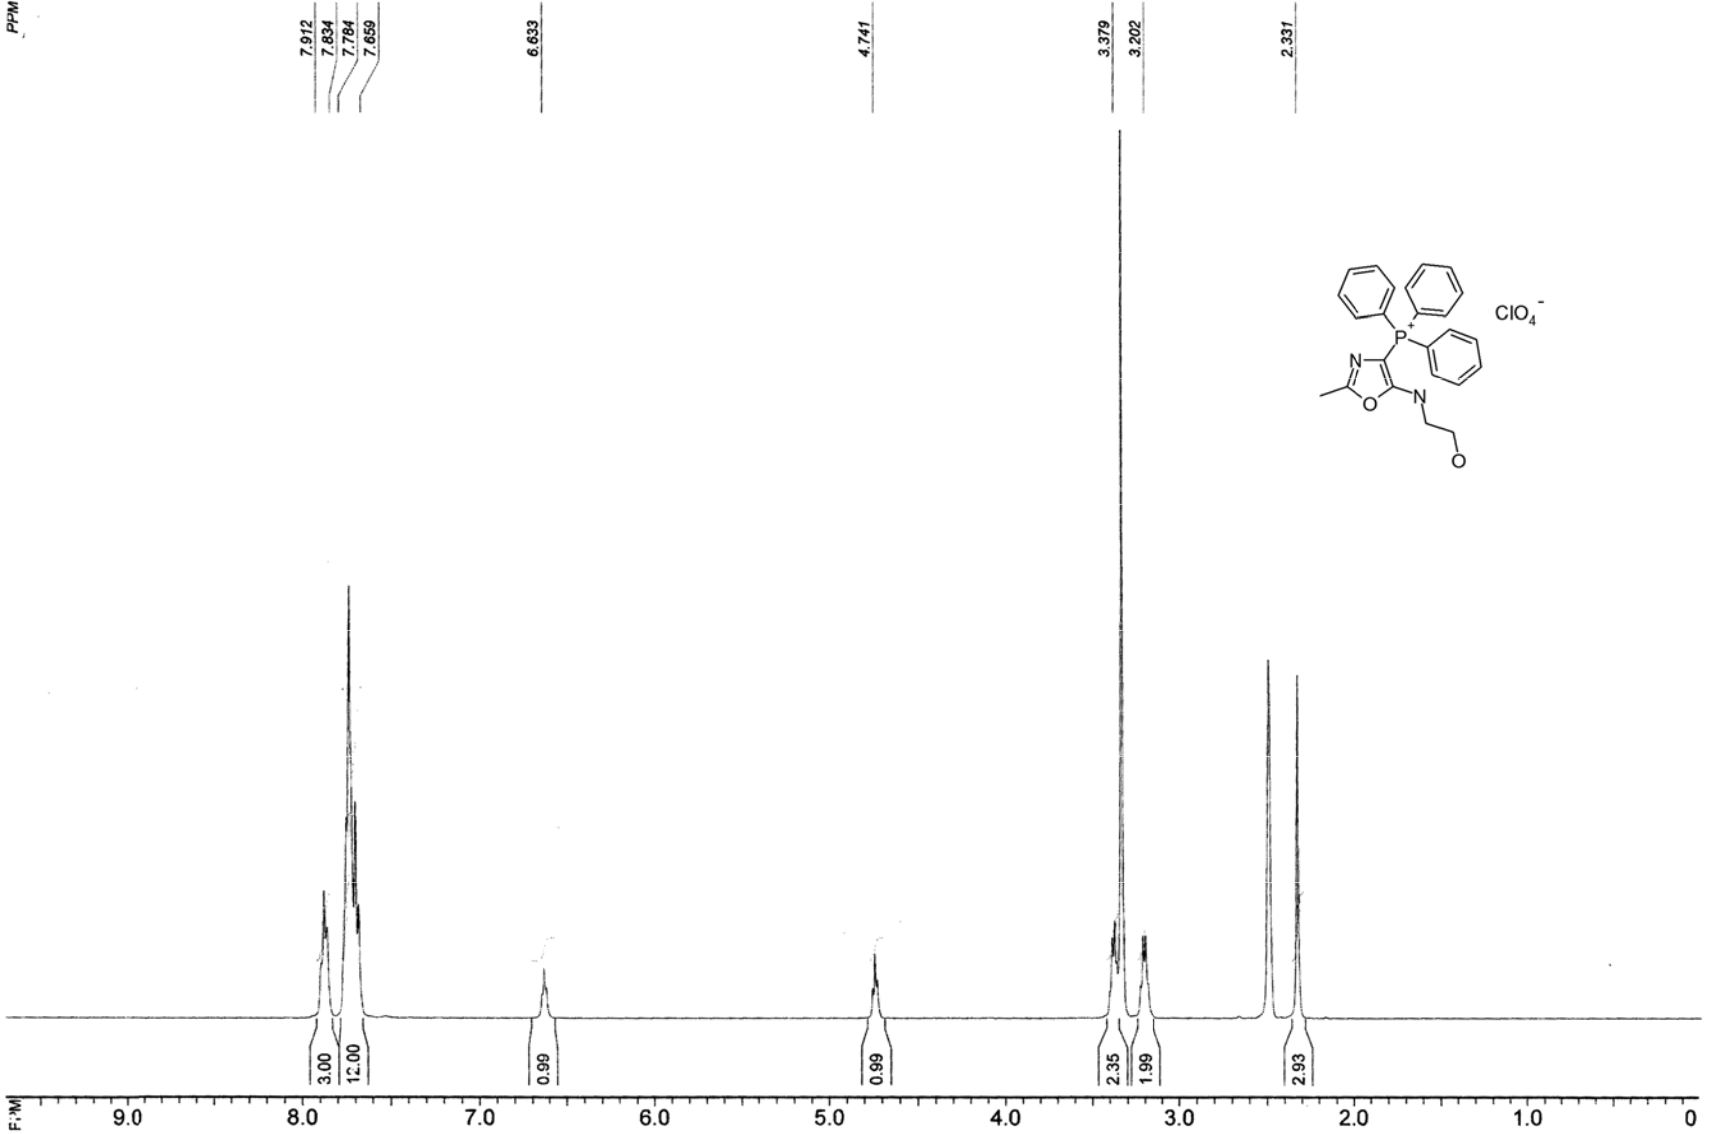


**Figure S 2.** 1H NMRspectra of [5-(2-Hydroxyethyl)amino-2-methyl-4-oxazolyl]triphenylphosphonium perchlorate **(3a)**.


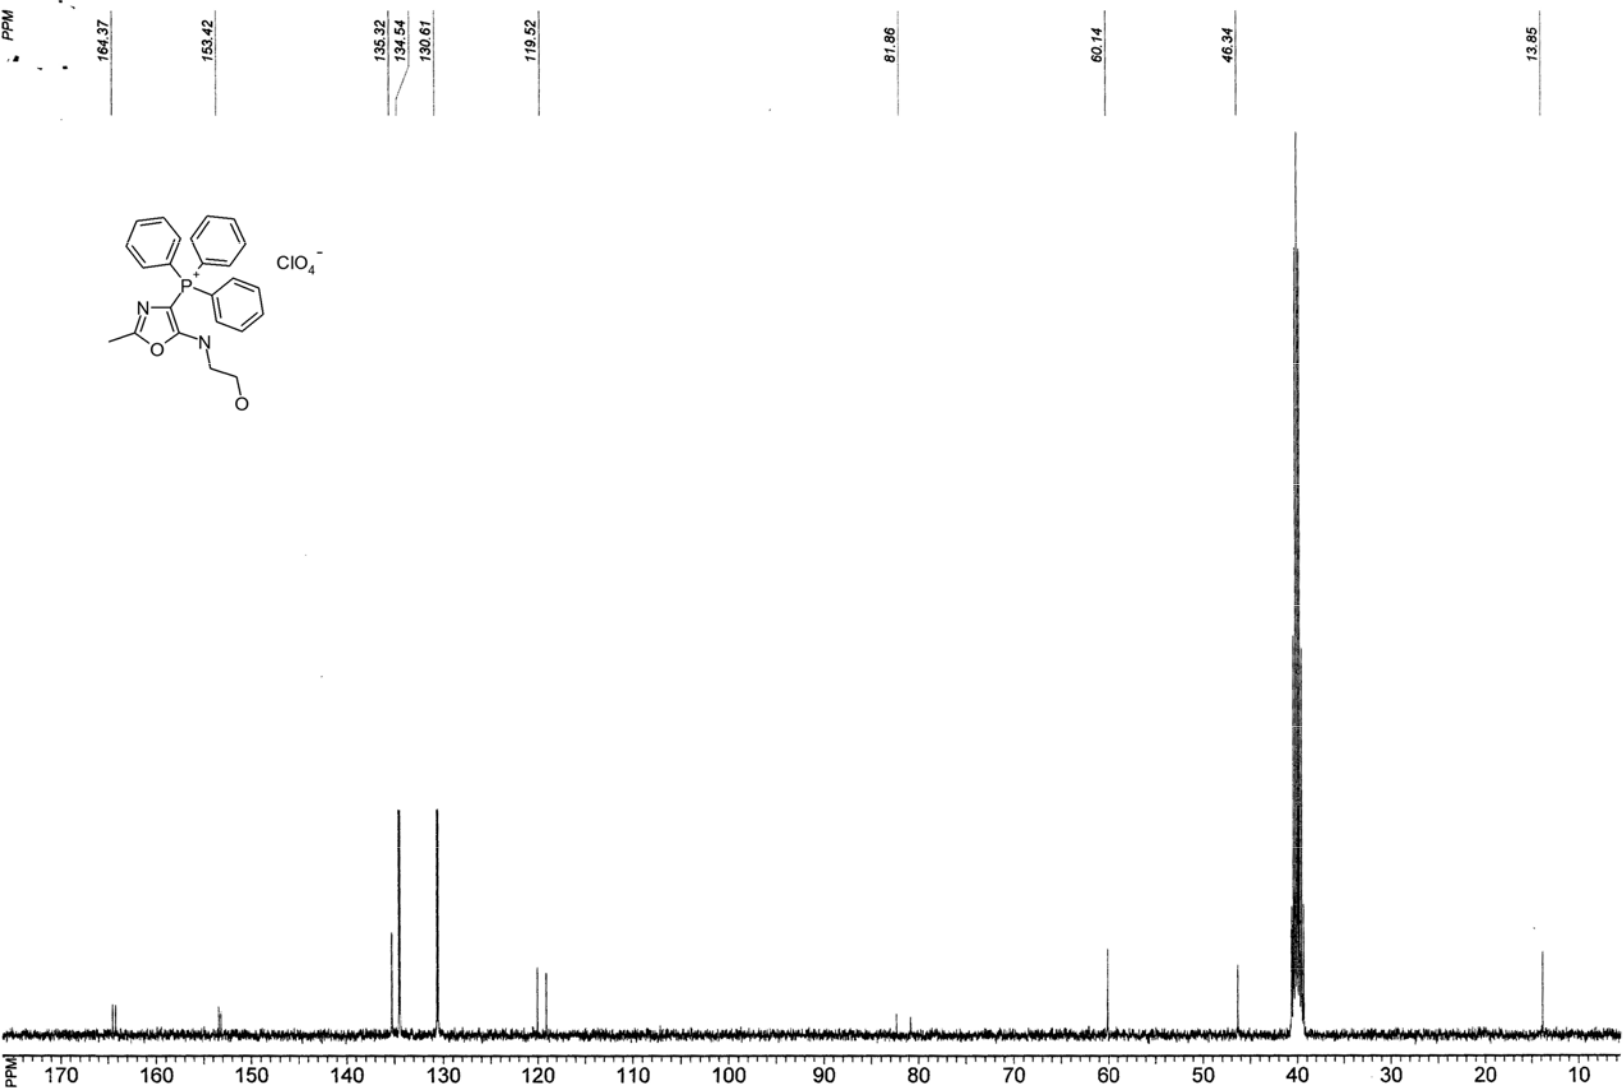


**Figure S 3.** 13C NMRspectra of [5-(2-Hydroxyethyl)amino-2-met**y**yl-4-oxazolyl]triphenylphosphonium perchlorate **(3a)**.


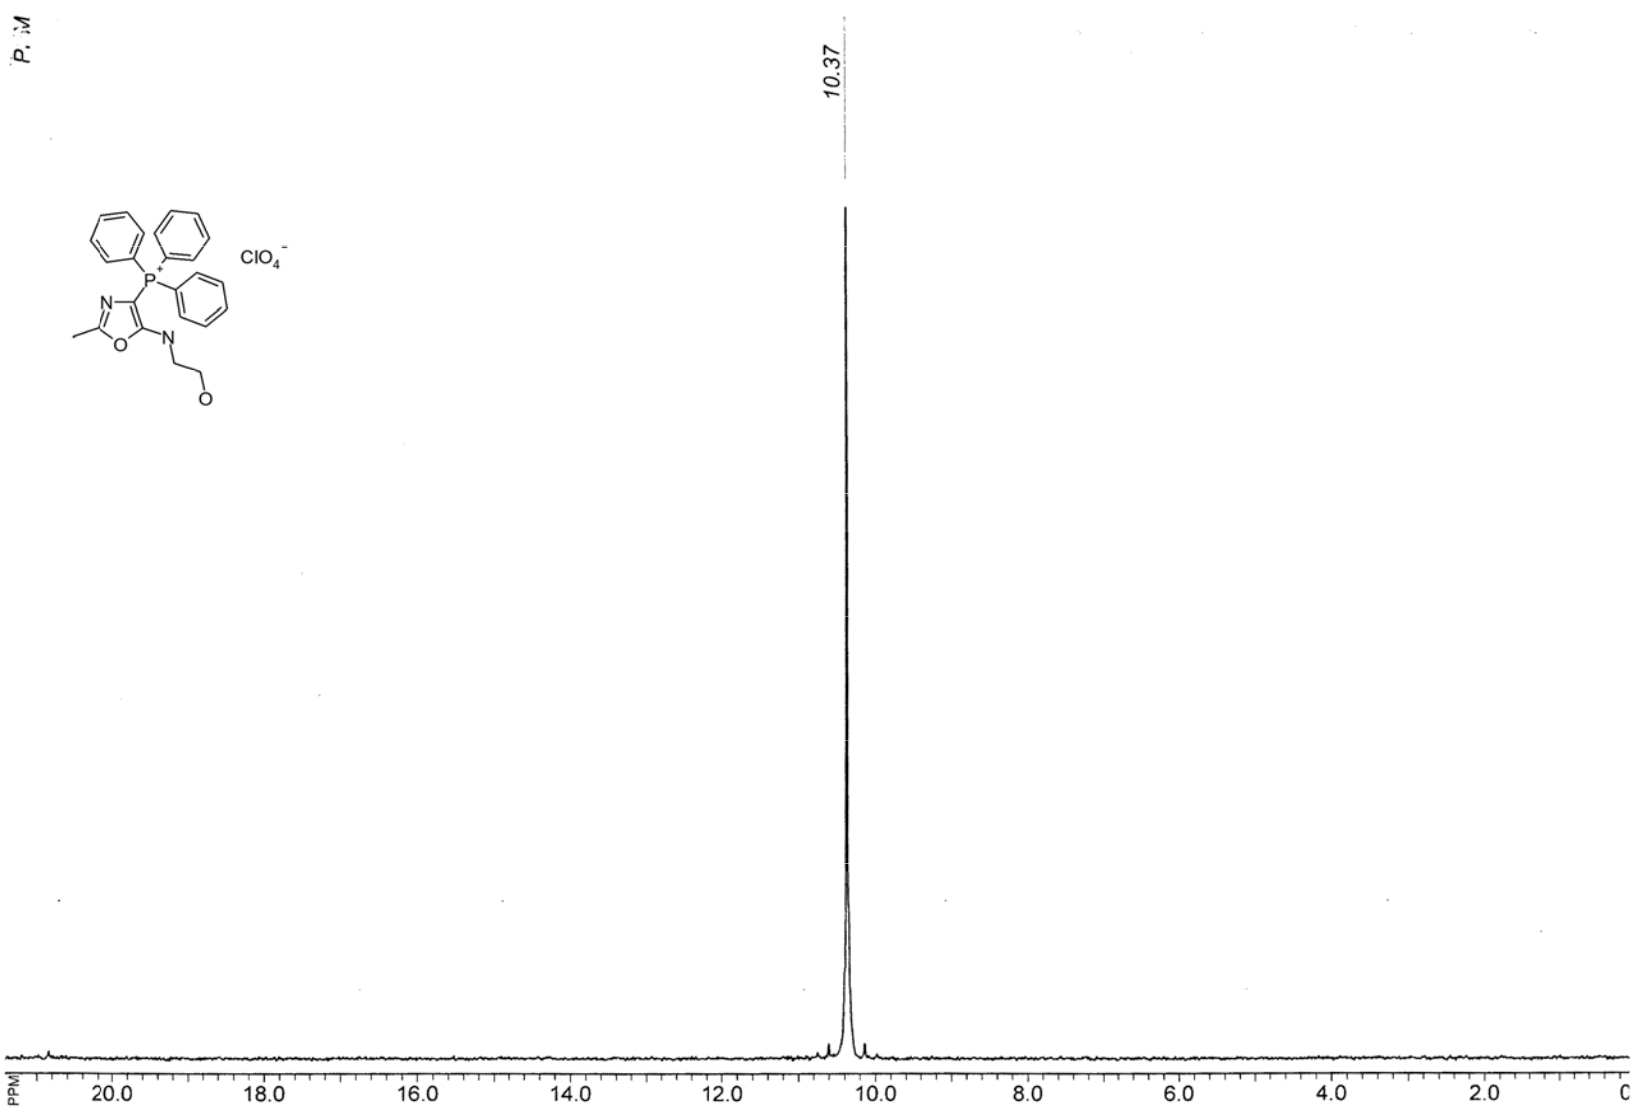


**Figure S 4.** 31P NMRspectra of [5-(2-Hydroxyethyl)amino-2-methyl-4-oxazolyl]triphenylphosphonium perchlorate **(3a)**.


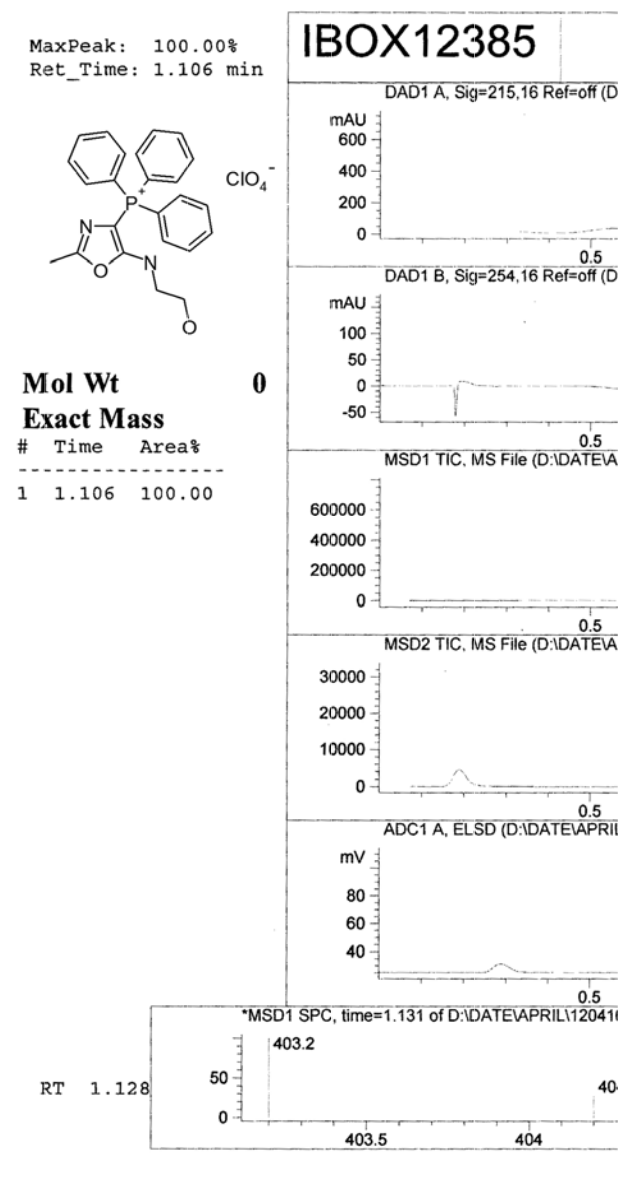


**Figure S 5.** LC MS spectraof [5-(2-Hydroxyethyl)oxazolyl]triphenylphosphonium perchlorate **(3a)**.

amino-2-meethyl-4-


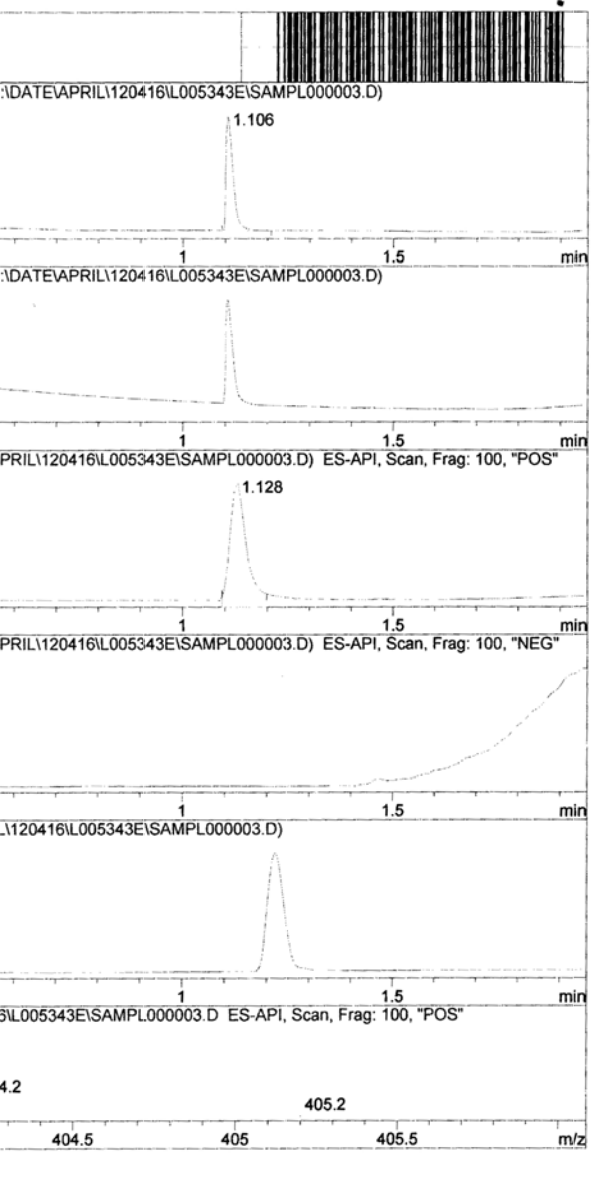


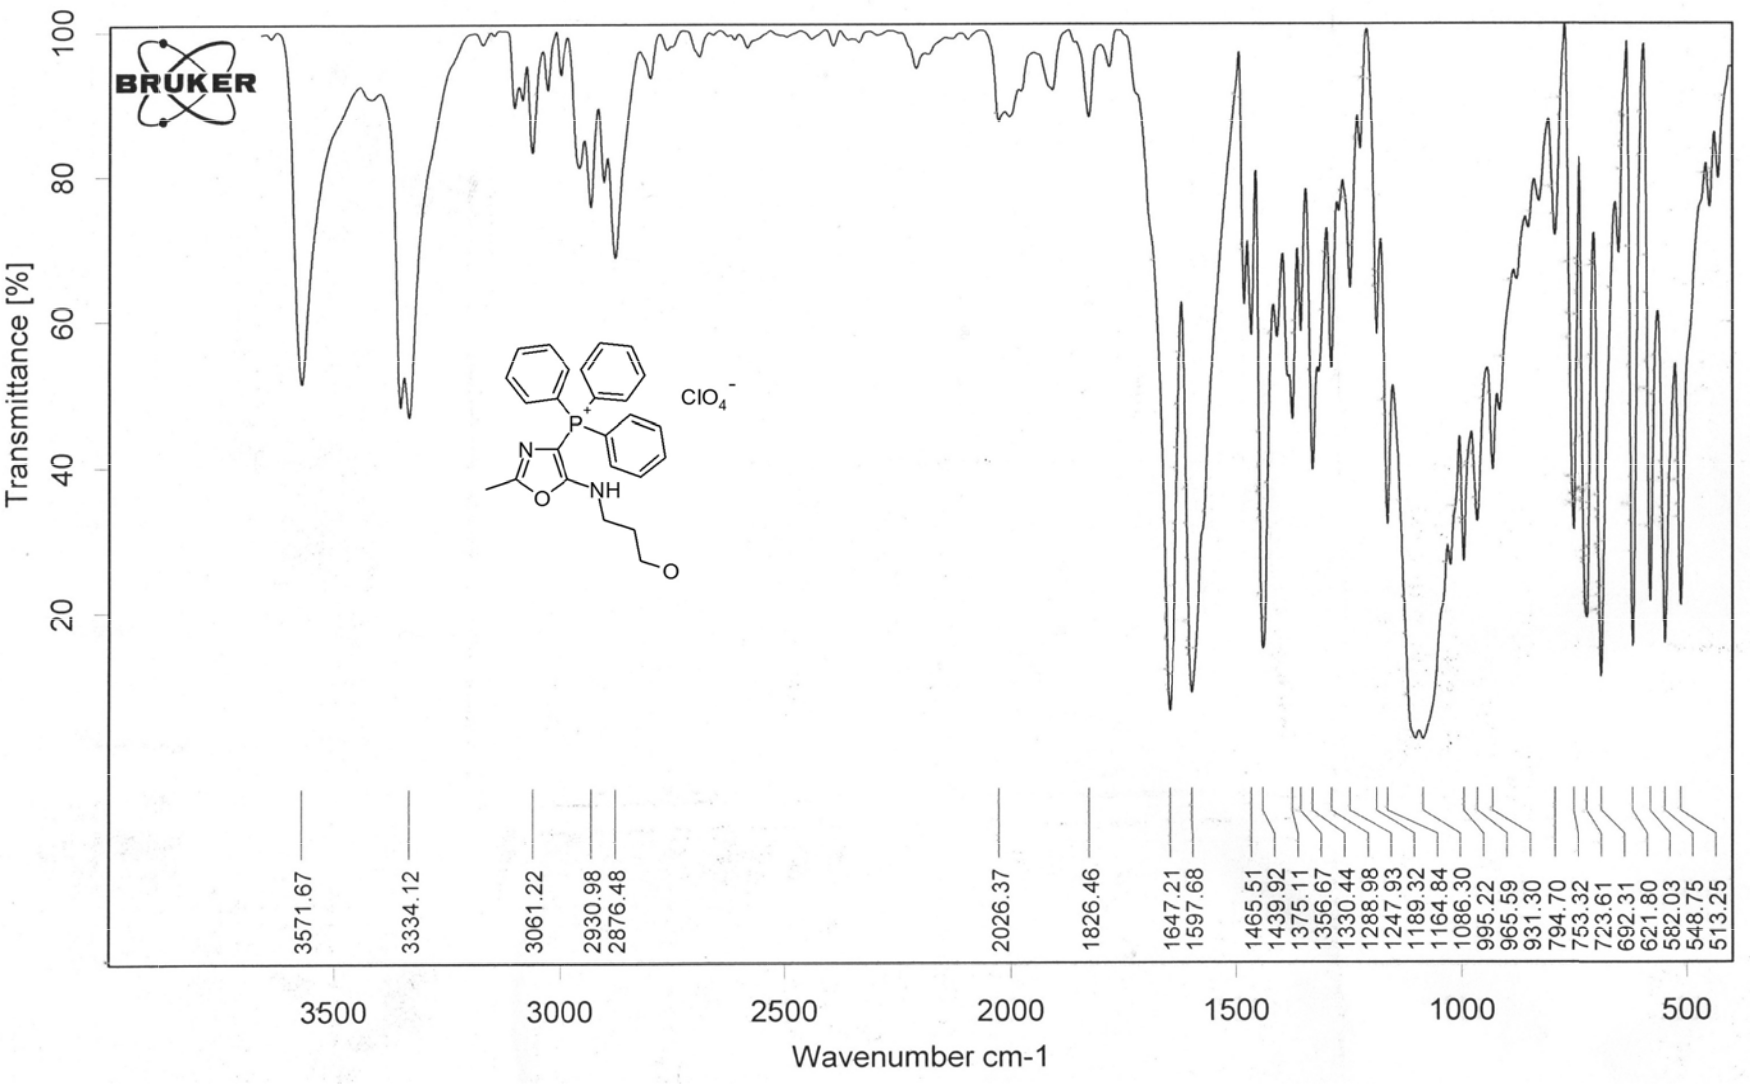


**Figure S 6.** IR (KBr) spectra of [5-(2-Hydroxypropyl)amino-2-methyl-4-oxazolyl]triphenylphosphnium perchlorate (**3b**).


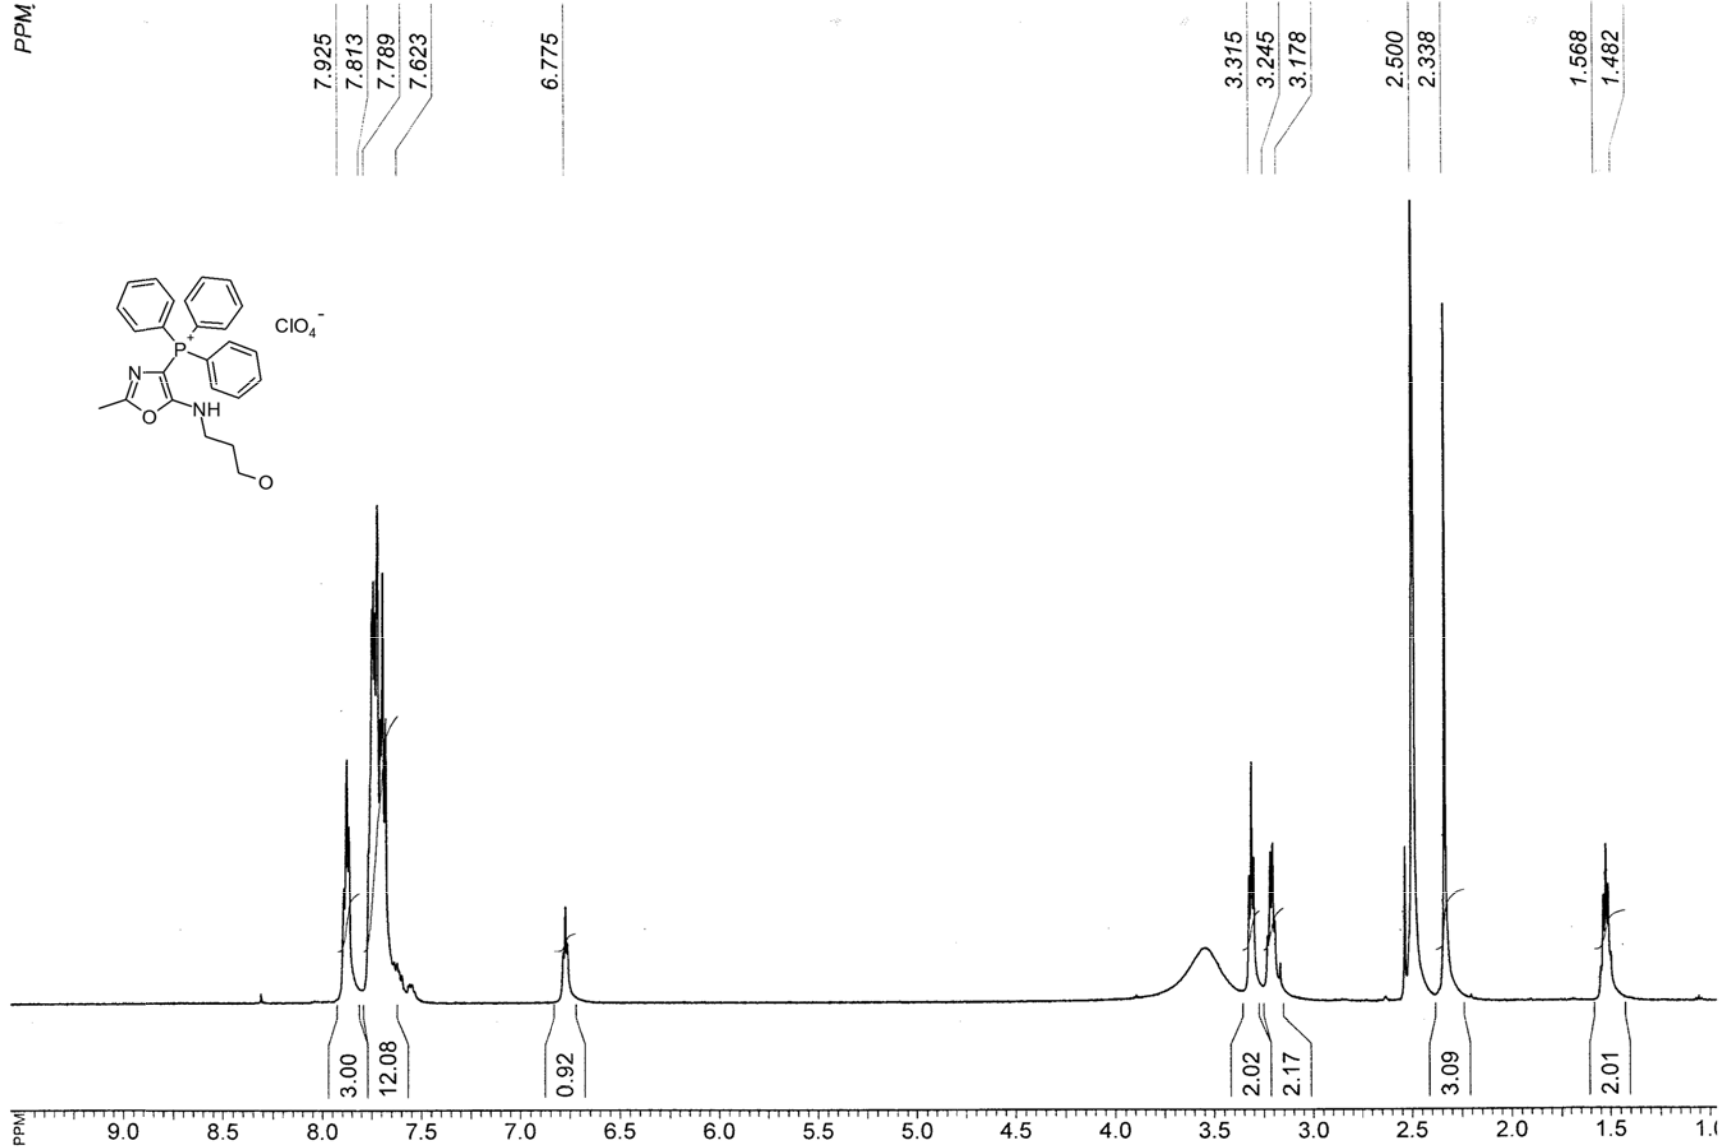


**Figure S 7.** 1H NMRspectrum of [5-(2-Hydroxypropyl)amino-2-methyl-4-oxazolyl]triphenylphosphonium perchlorate (**3b**).


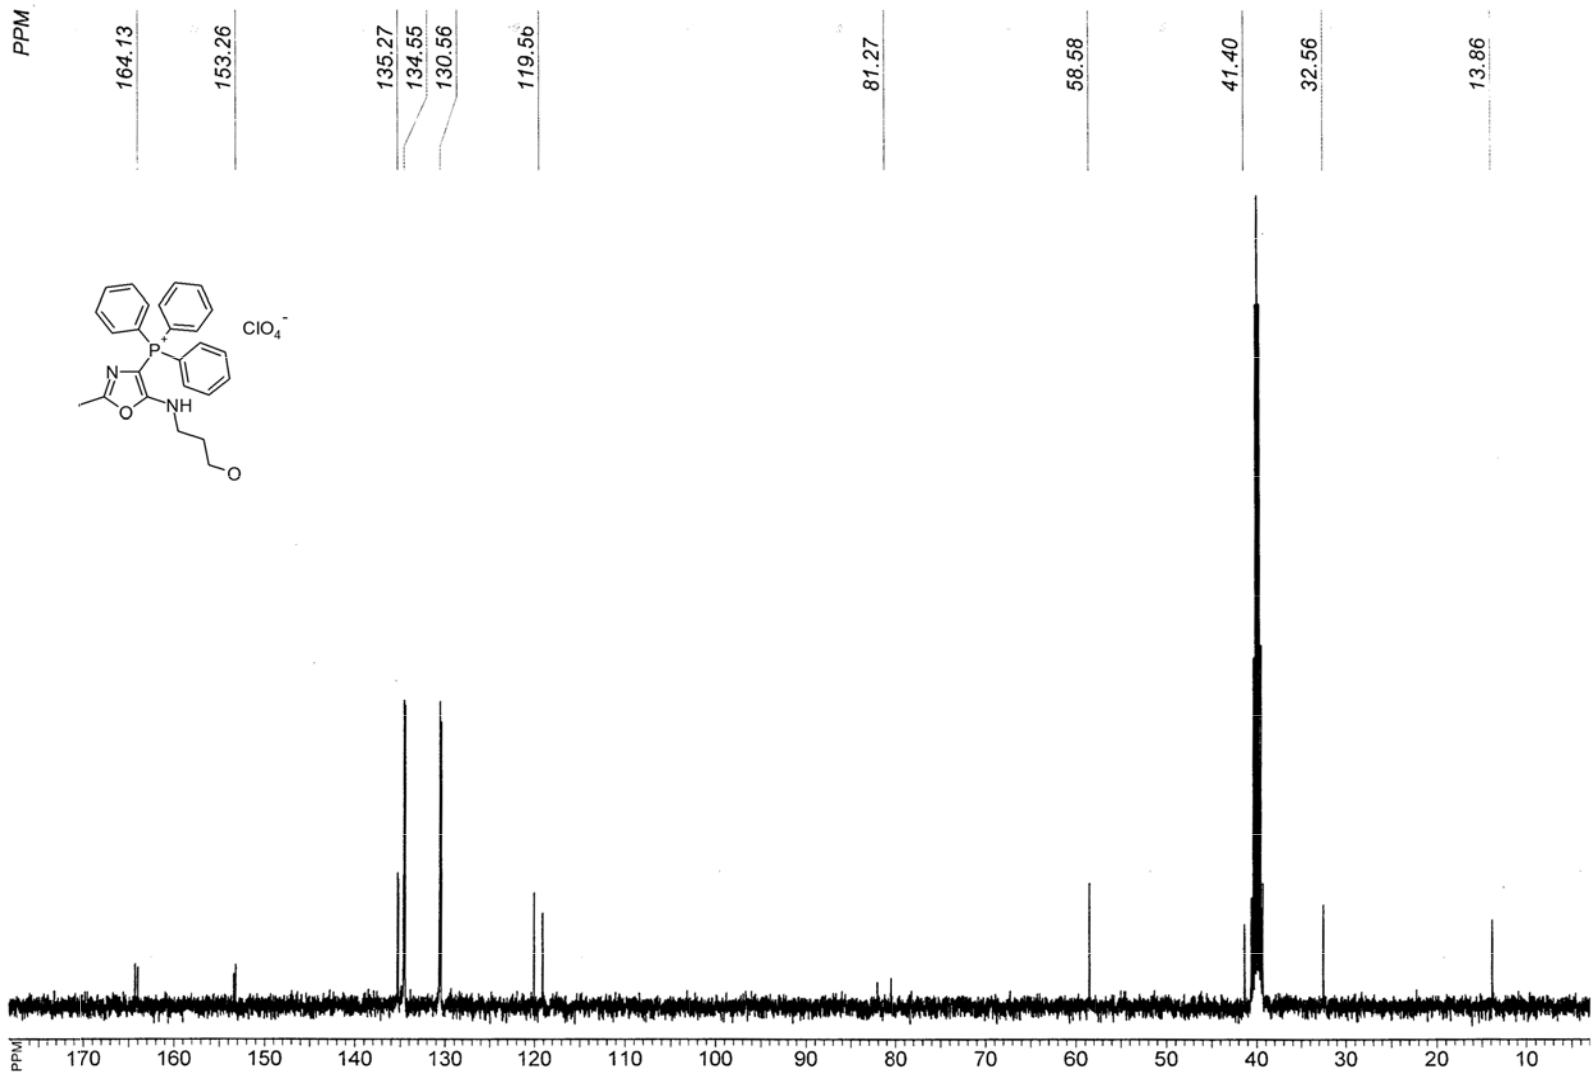


**Figure S 8.** 13C NMRspectra of [5-(2-Hydroxypropyl)amino-2-methyl-4-oxazolyl]triphenylphosphonium perchlorate (**3b**).


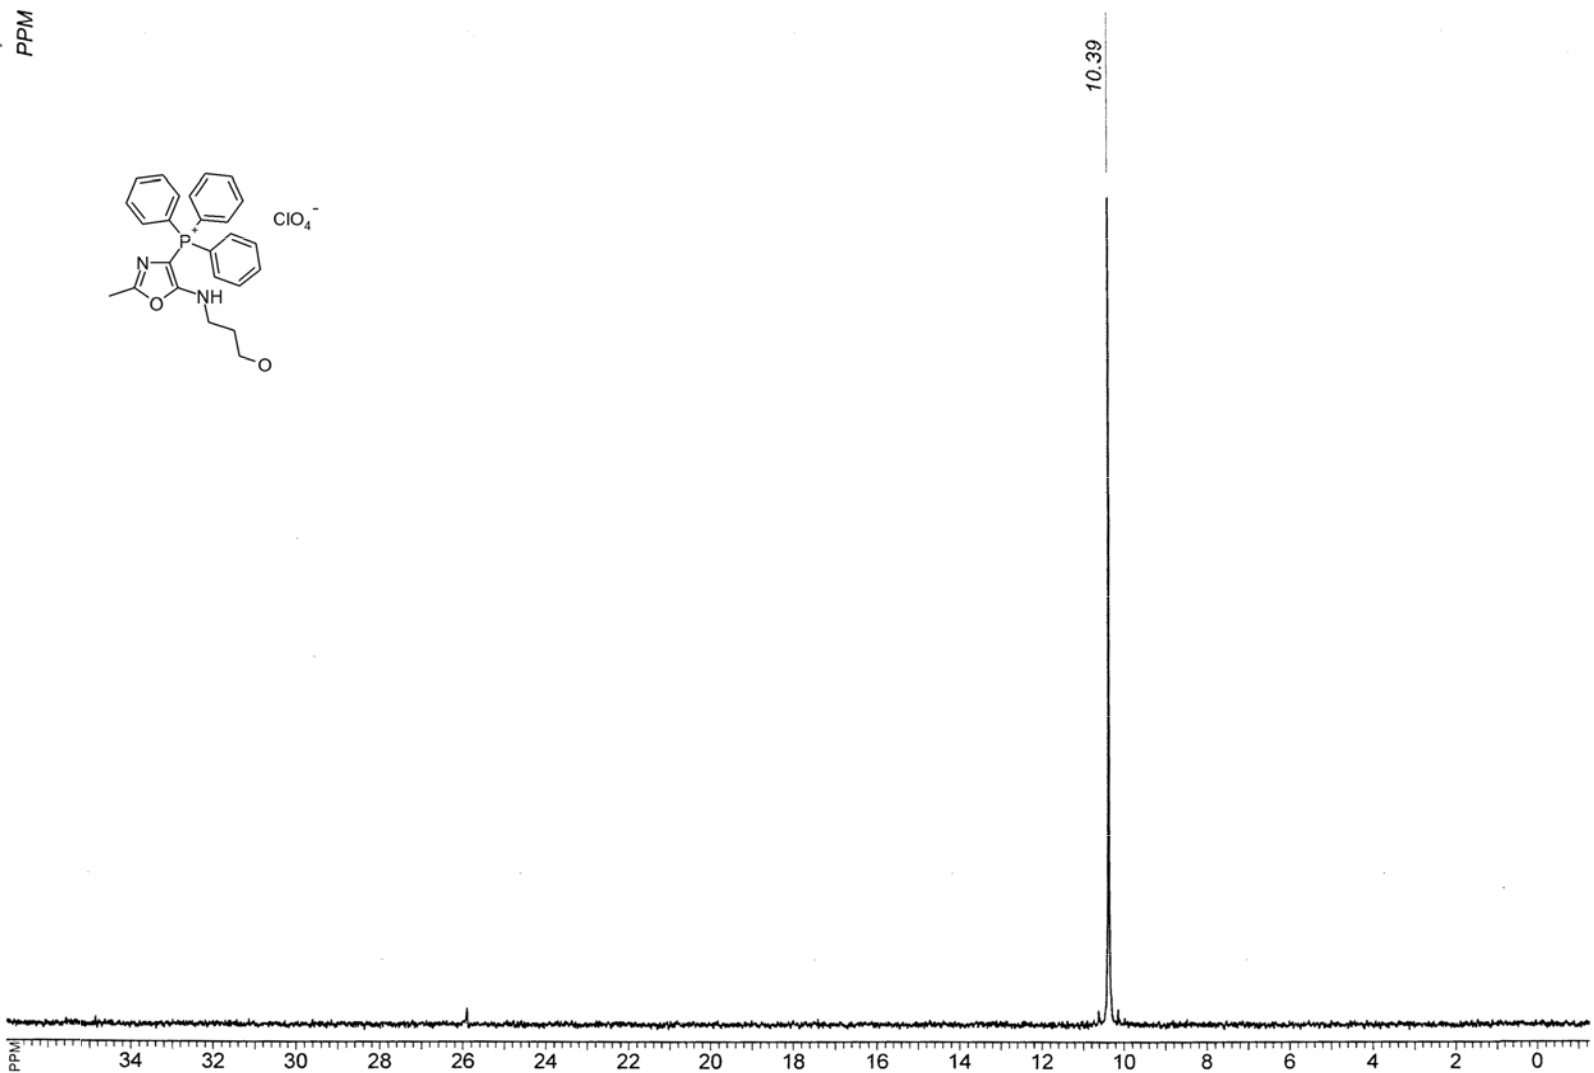


**Figure S 9.** 31P NMRspectra of [5-(2-Hydroxypropyl)amino-2-methyl-4-oxazolyl]triphenylphosphonium perchlorate (**3b**).


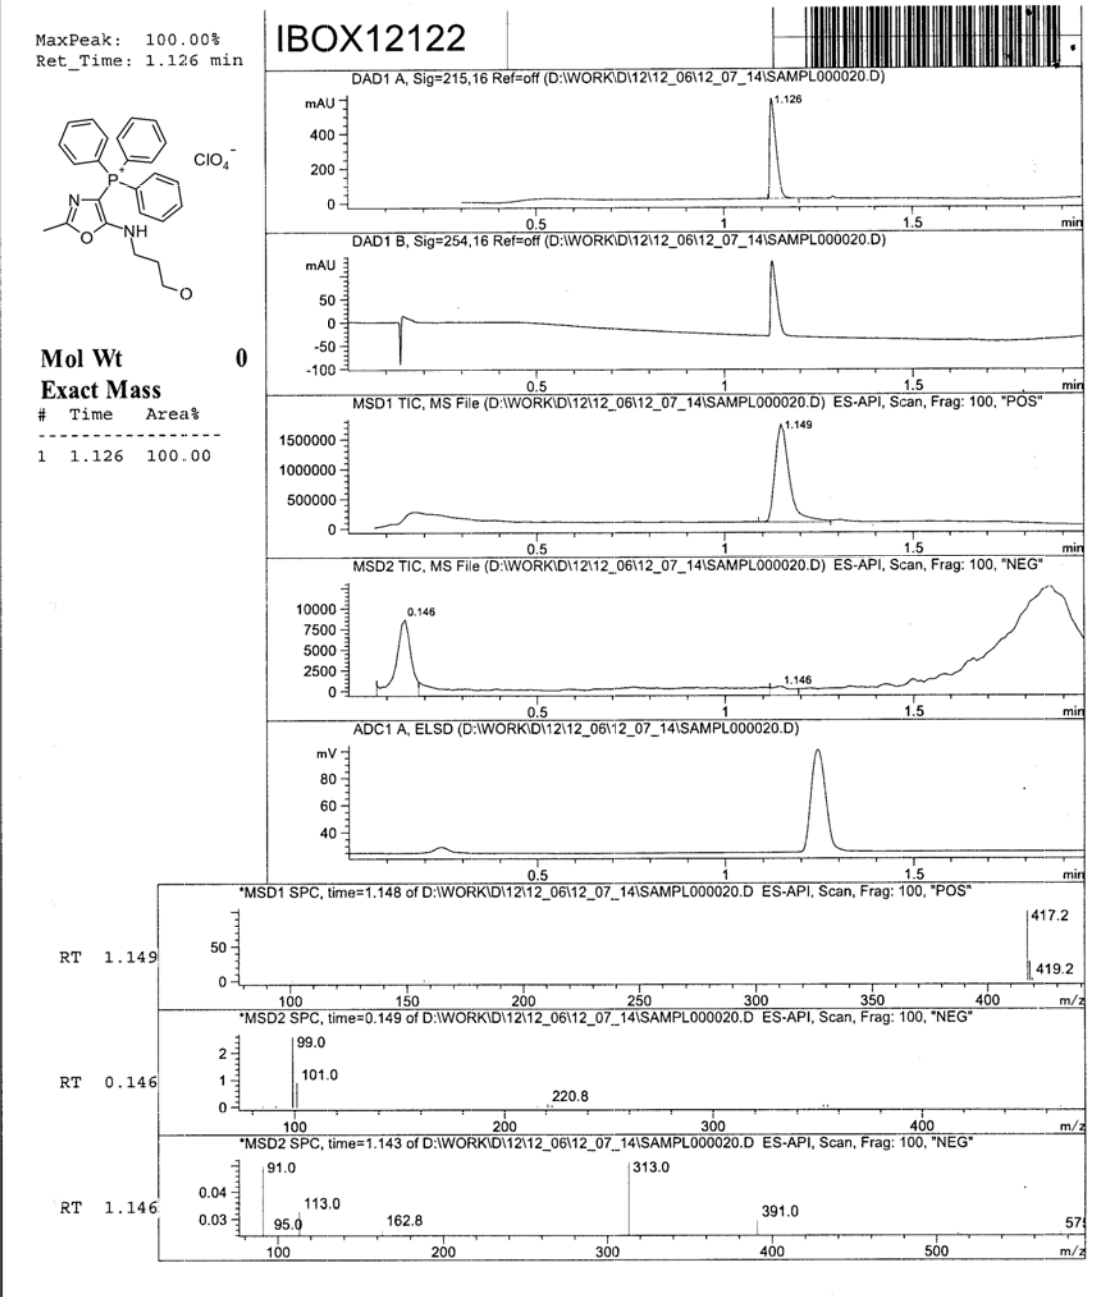


**Figure S 10.** LCMS spectra of [5-(2-Hydroxypropyl)amino-2-methyl-4-oxazolyl]triphenylphosphonium perchlorate (**3b**).


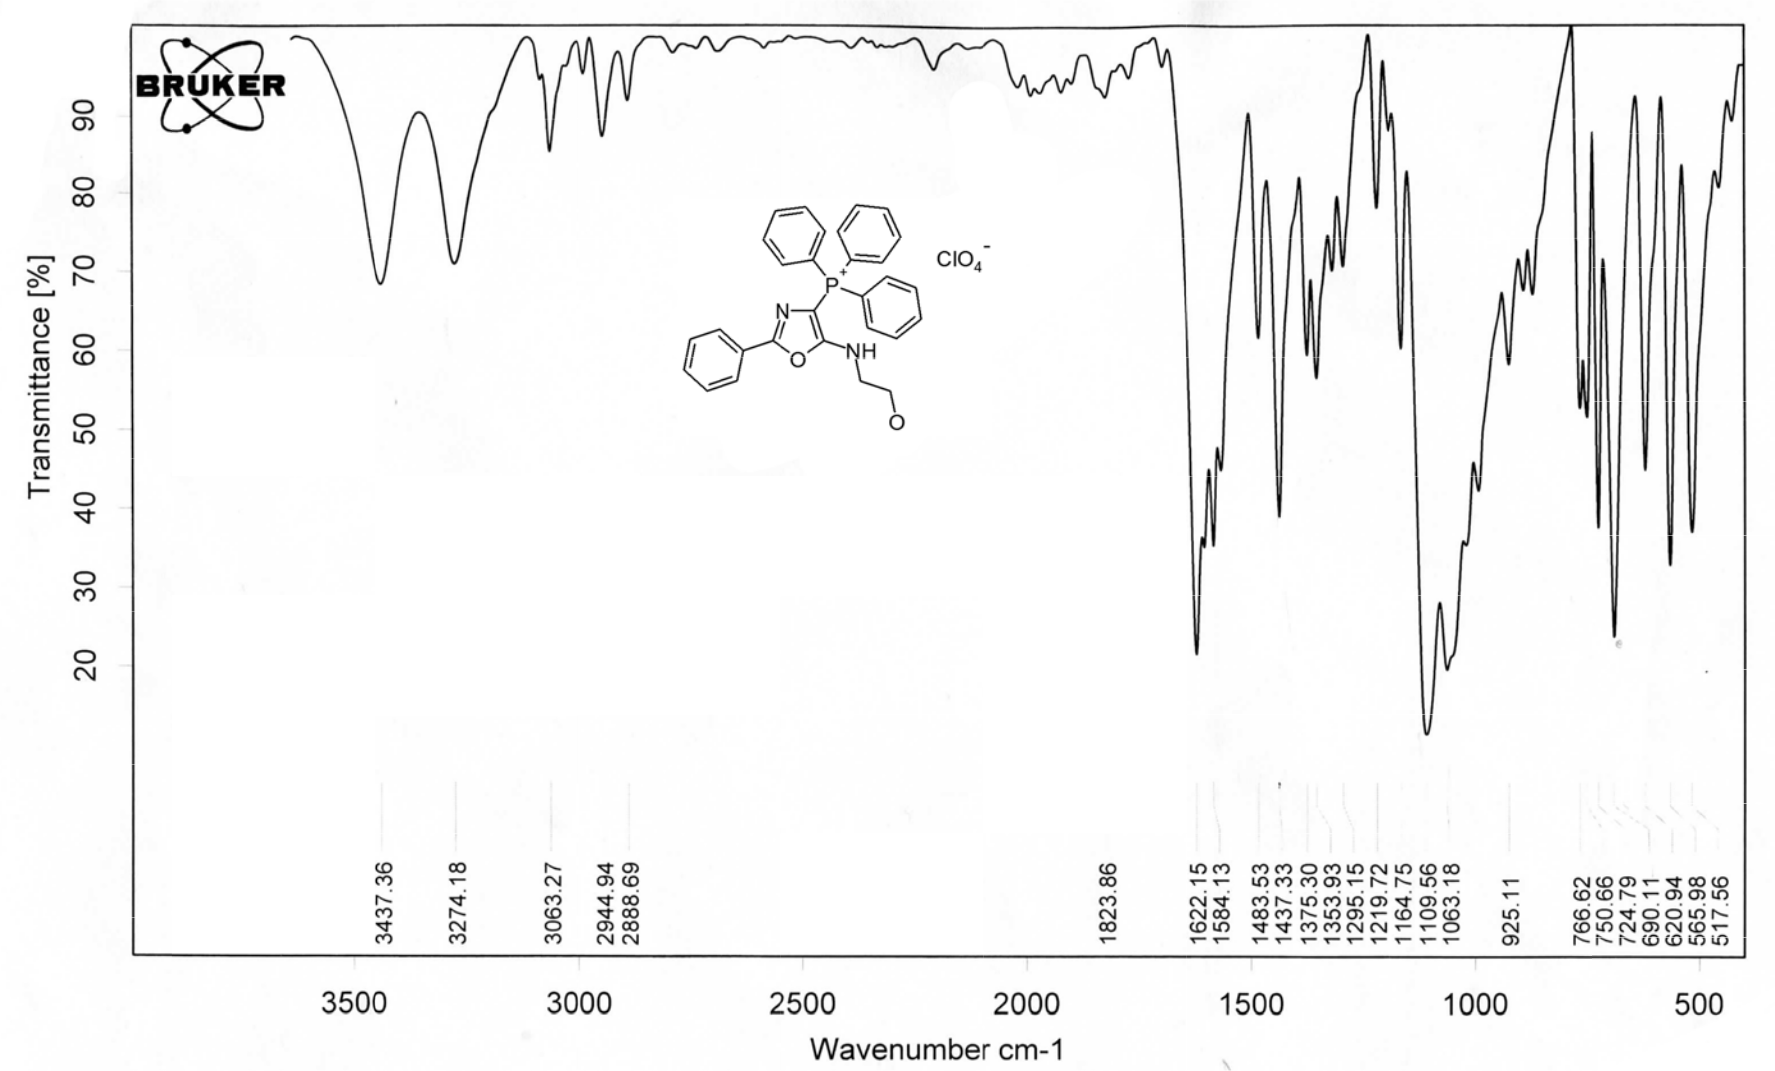


**Figure S 11.** IR spe trum of [5-(2-Hydroxyethyl)amino-2-phenyl-4-oxazolyl]triphenylphosphoniumperchlorate (**3c**).


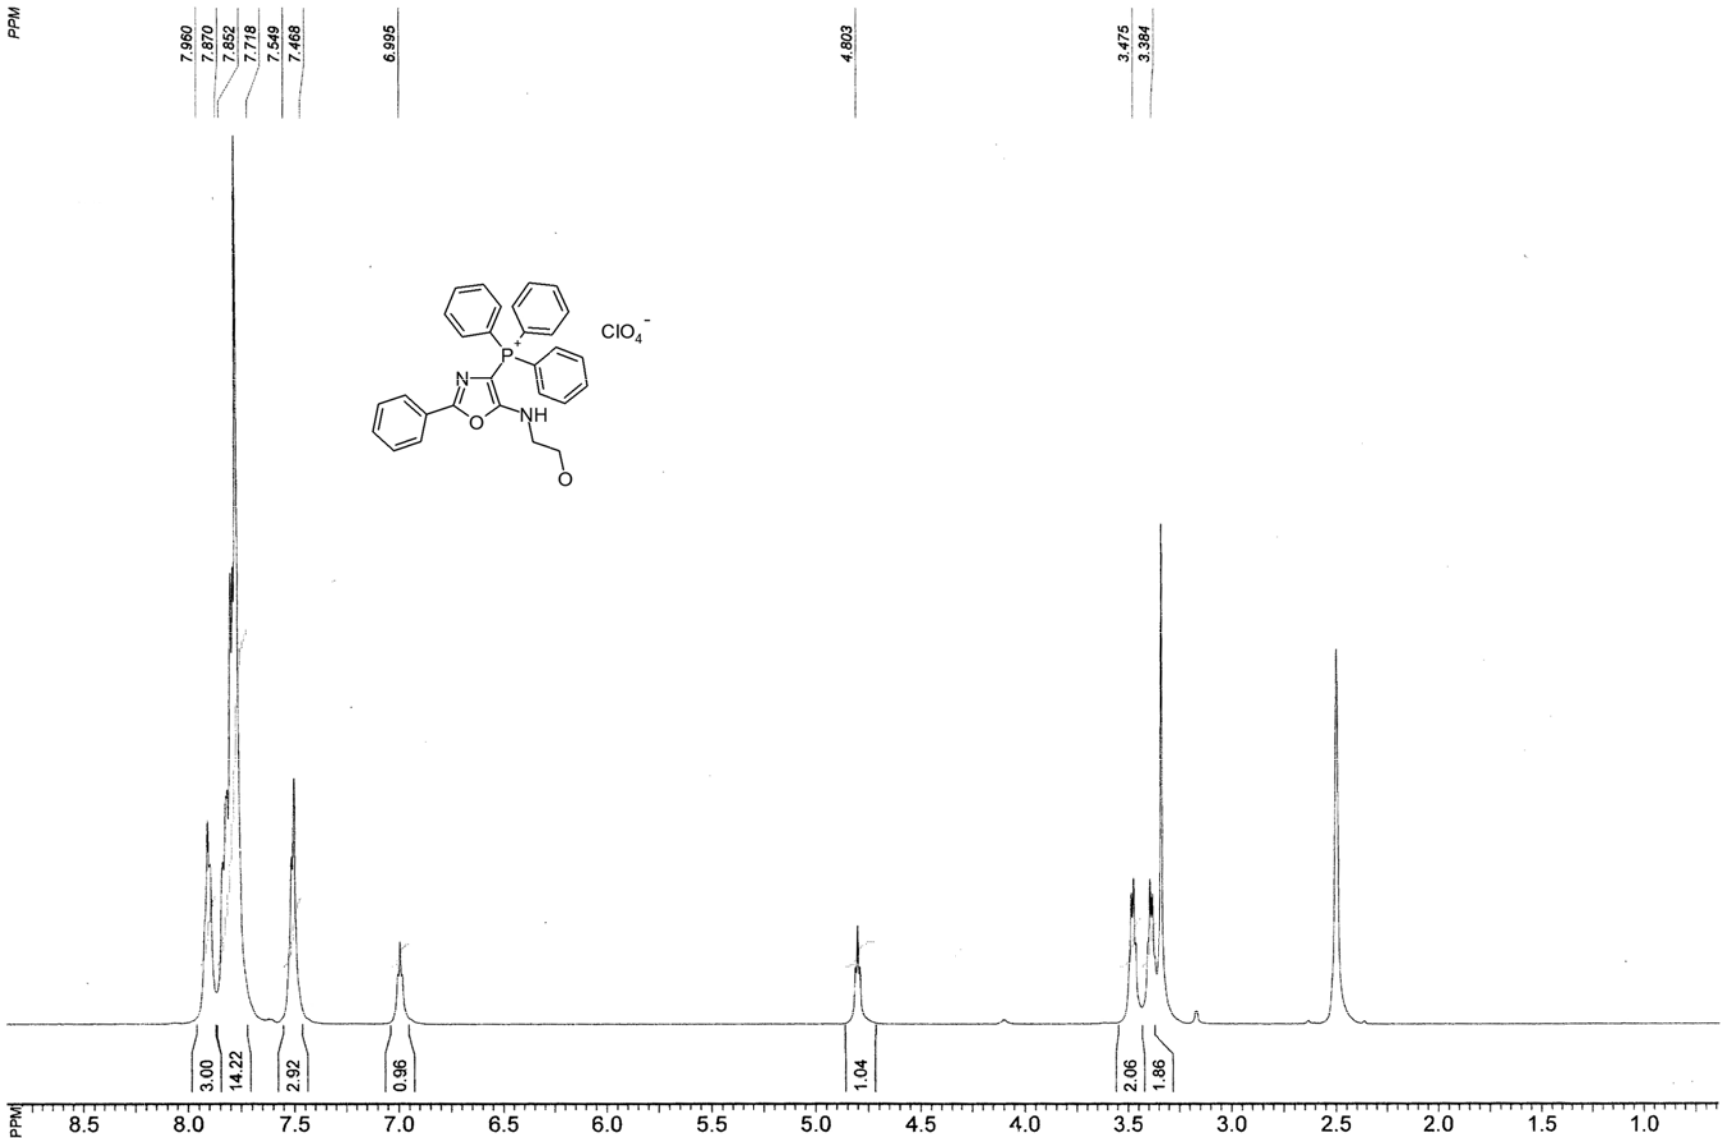


**Figure S 12.** 1H NMR spectrum of [5-(2-Hydroxyethyl)amino-2-phenyl-4-oxazolyl]triphenylphosphonium perchlorate (**3c**).


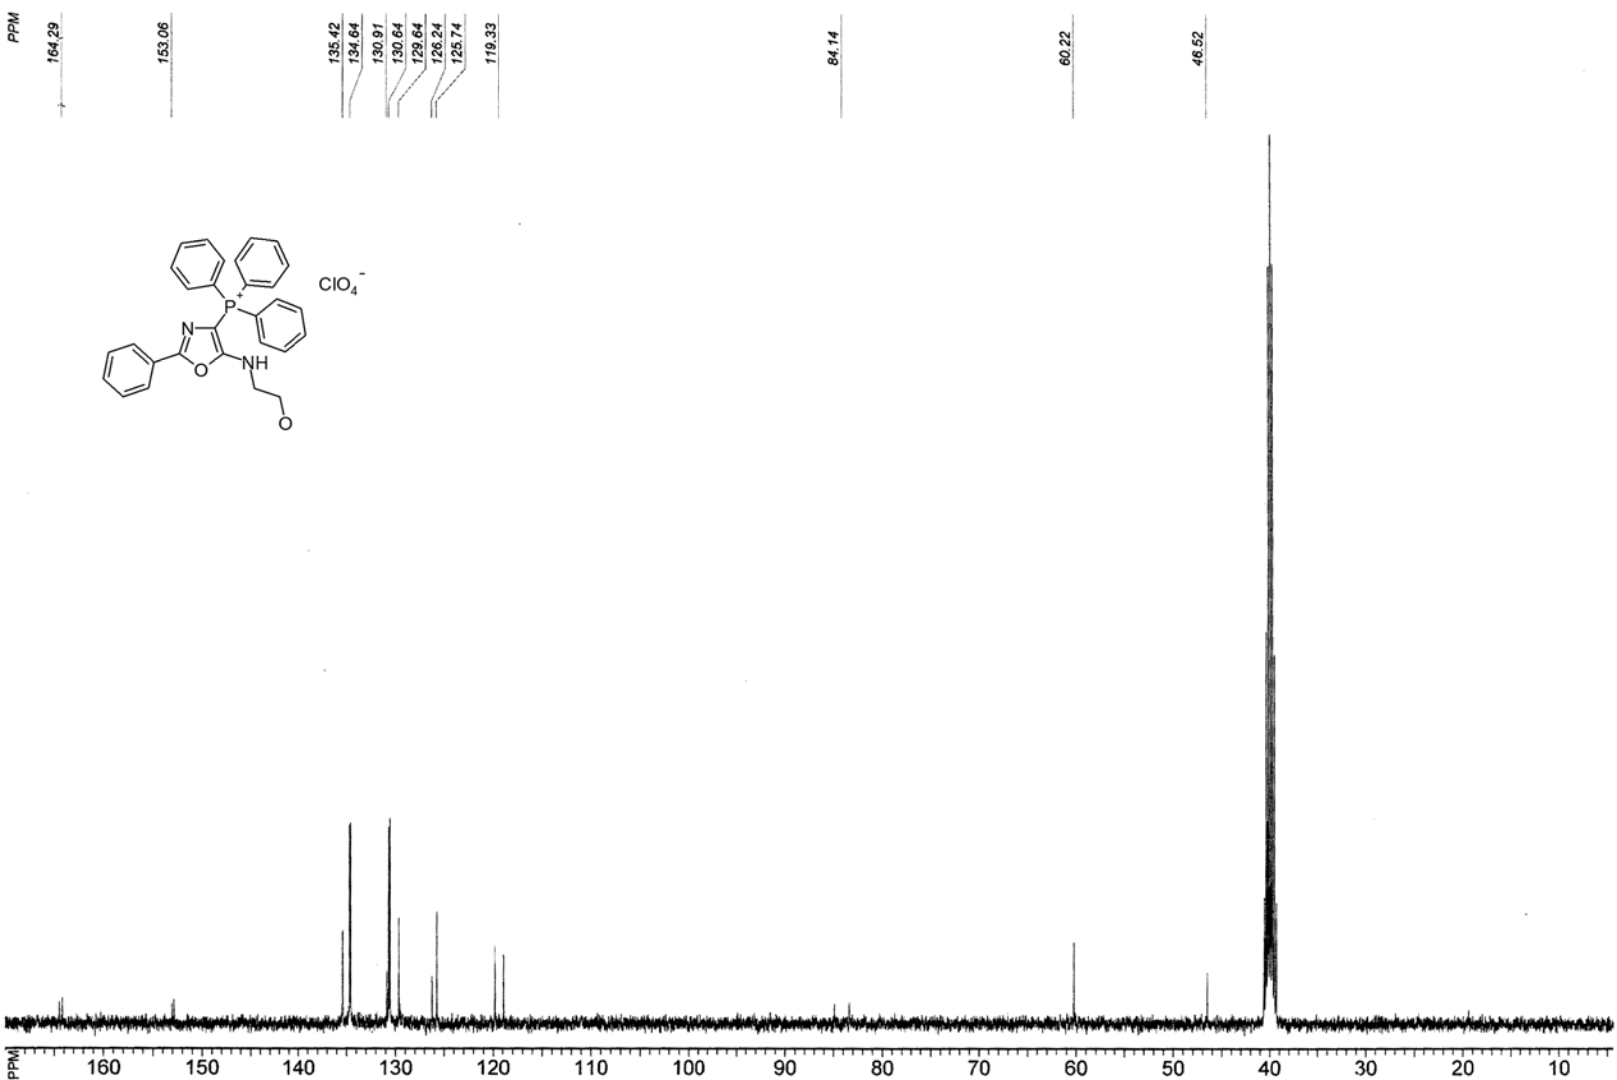


**Figure S 13.** 13C NMR spectrum of [5-(2-Hydroxyethyl)amino-2-phenyl-4-oxazoly ]triphenylphosphonium perchlorate (**3c**).


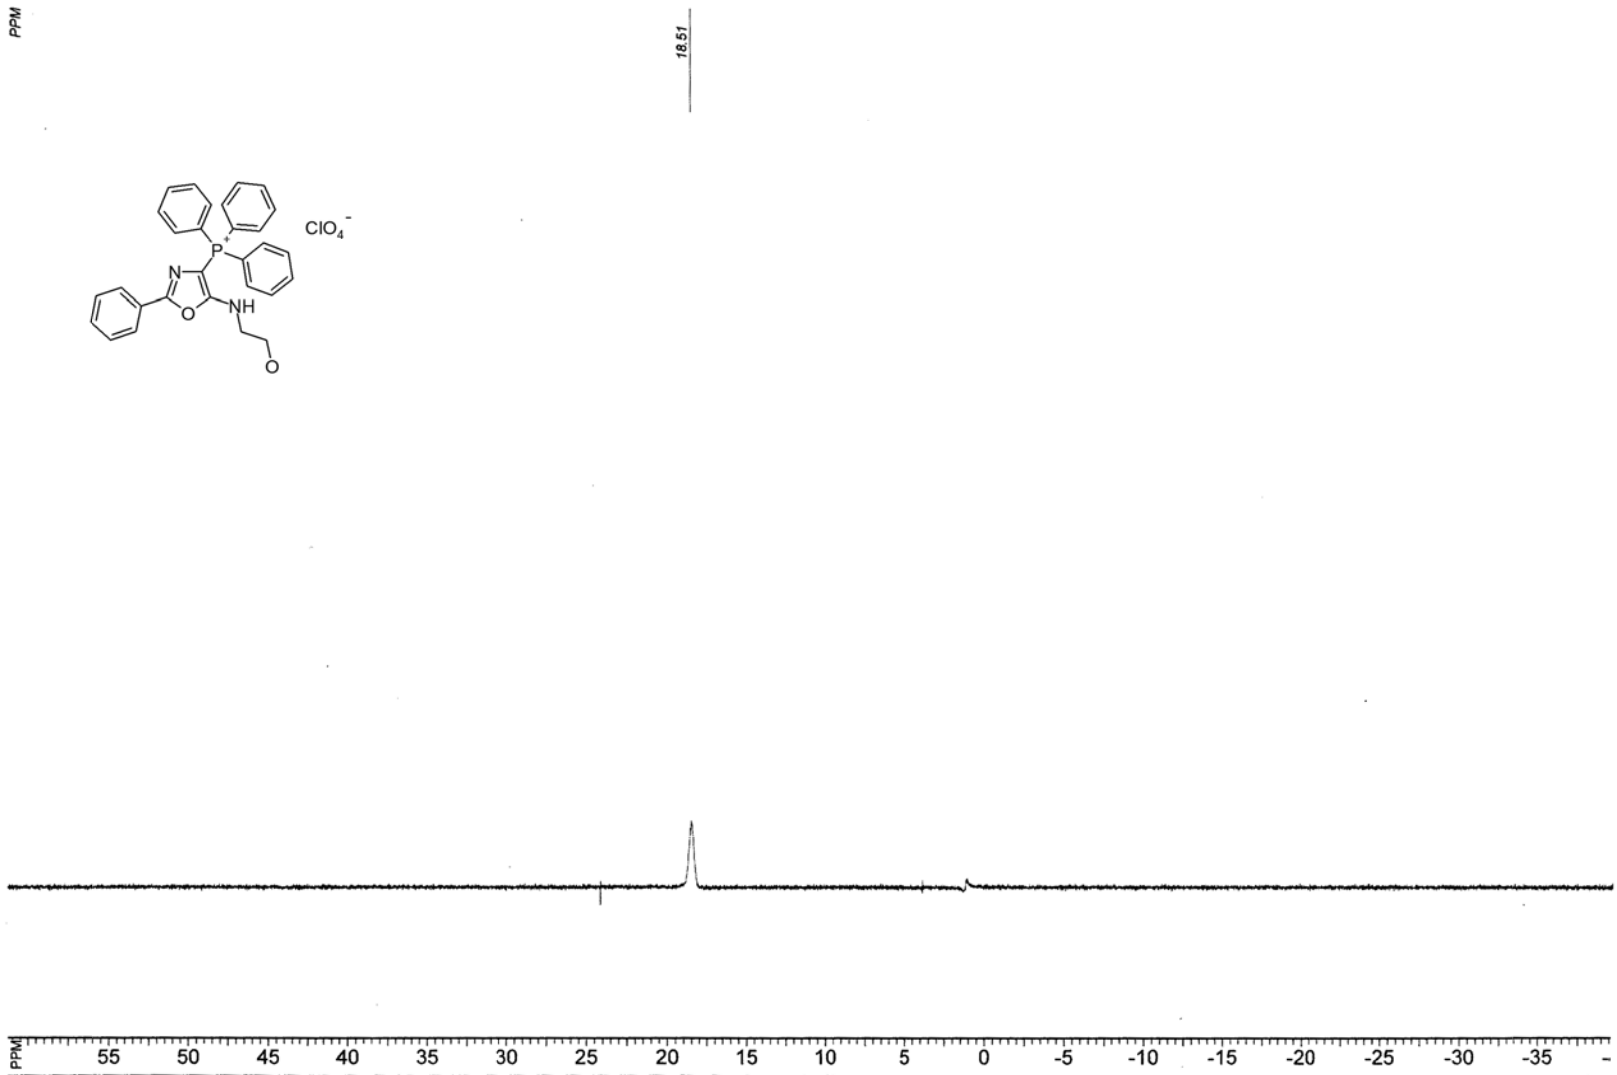


**Figure S 14.** 31P NMR spectrum of 5-(2-Hydroxyethyl)amino-2-phenyl-4-oxazolyl]triphenylphosphonium perchlorate (**3c**).


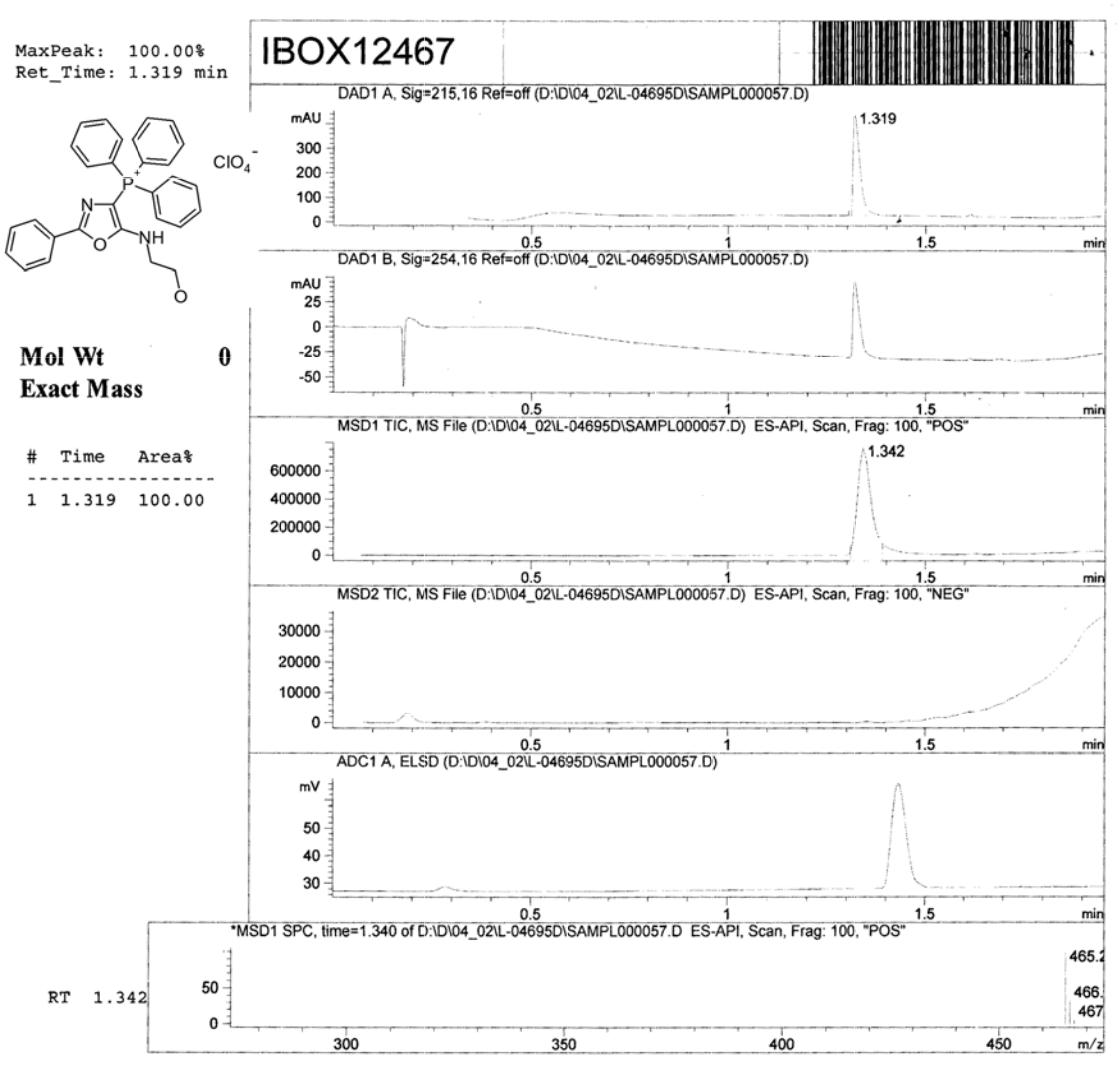


**Figure S 15.** LCMS analysis report of [5-(2-Hydroxyethyl)amino-2-phenyl-4-oxazolyl]triphenylphosphonium perchlorate (**3c**).


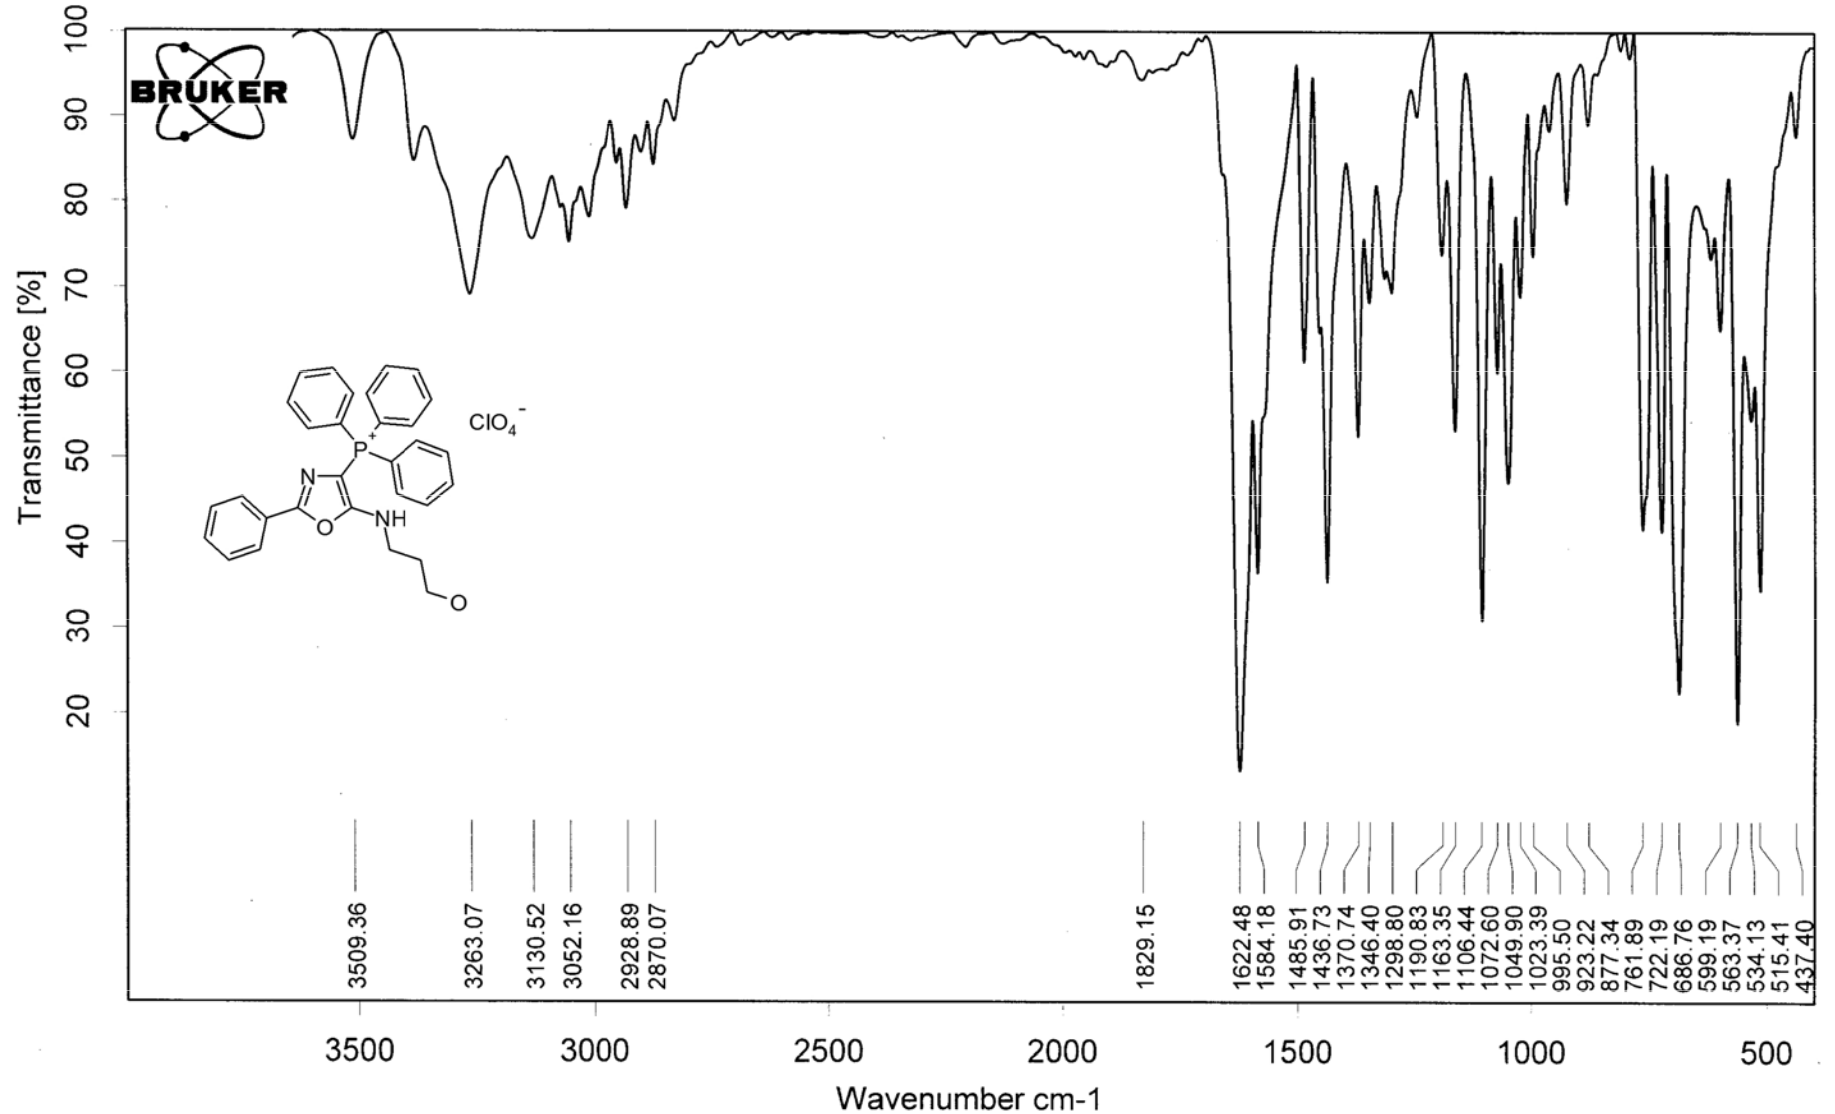


**Figure S 16.** IR spectrum of [5-(2- ydroxypropyl)amino-2-phenyl-4-oxazolyl]triphenylphosphonium perchlorate **3d**).


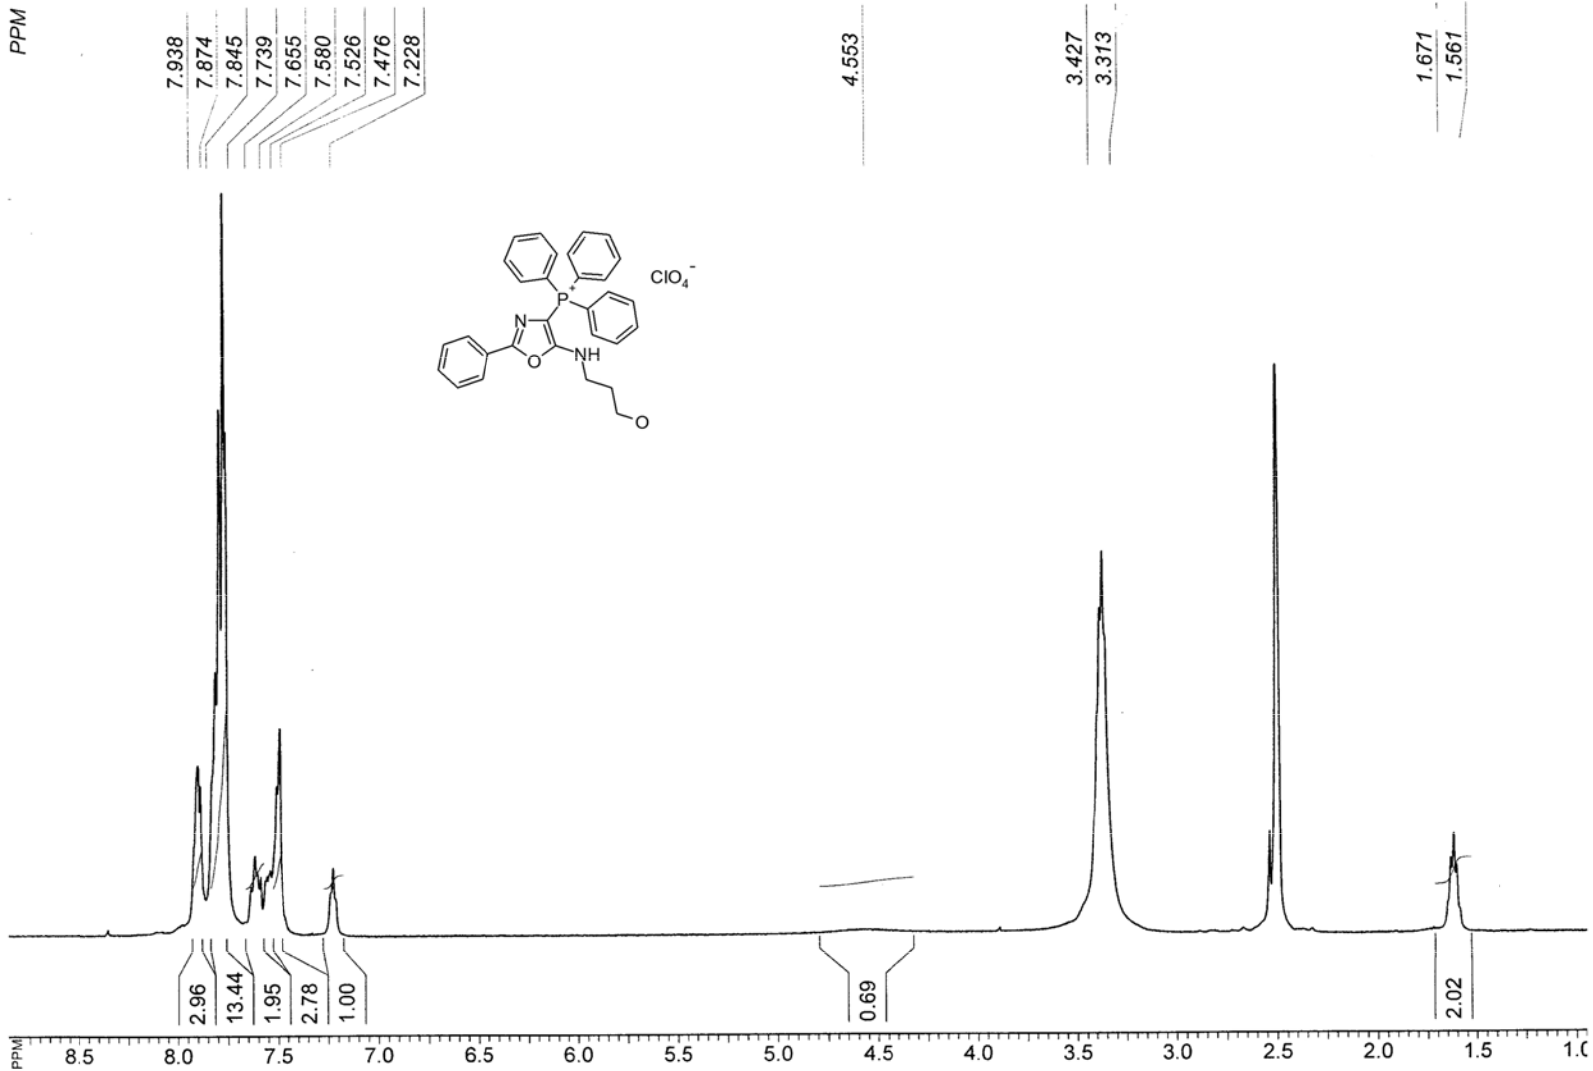


**Figure S 17.** 1H NMR spectrum of [5-(2-Hydroxypropyl)amino-2-phenyl-4-oxazolyl]triphenylphosphonium perchlorate (**3d**).


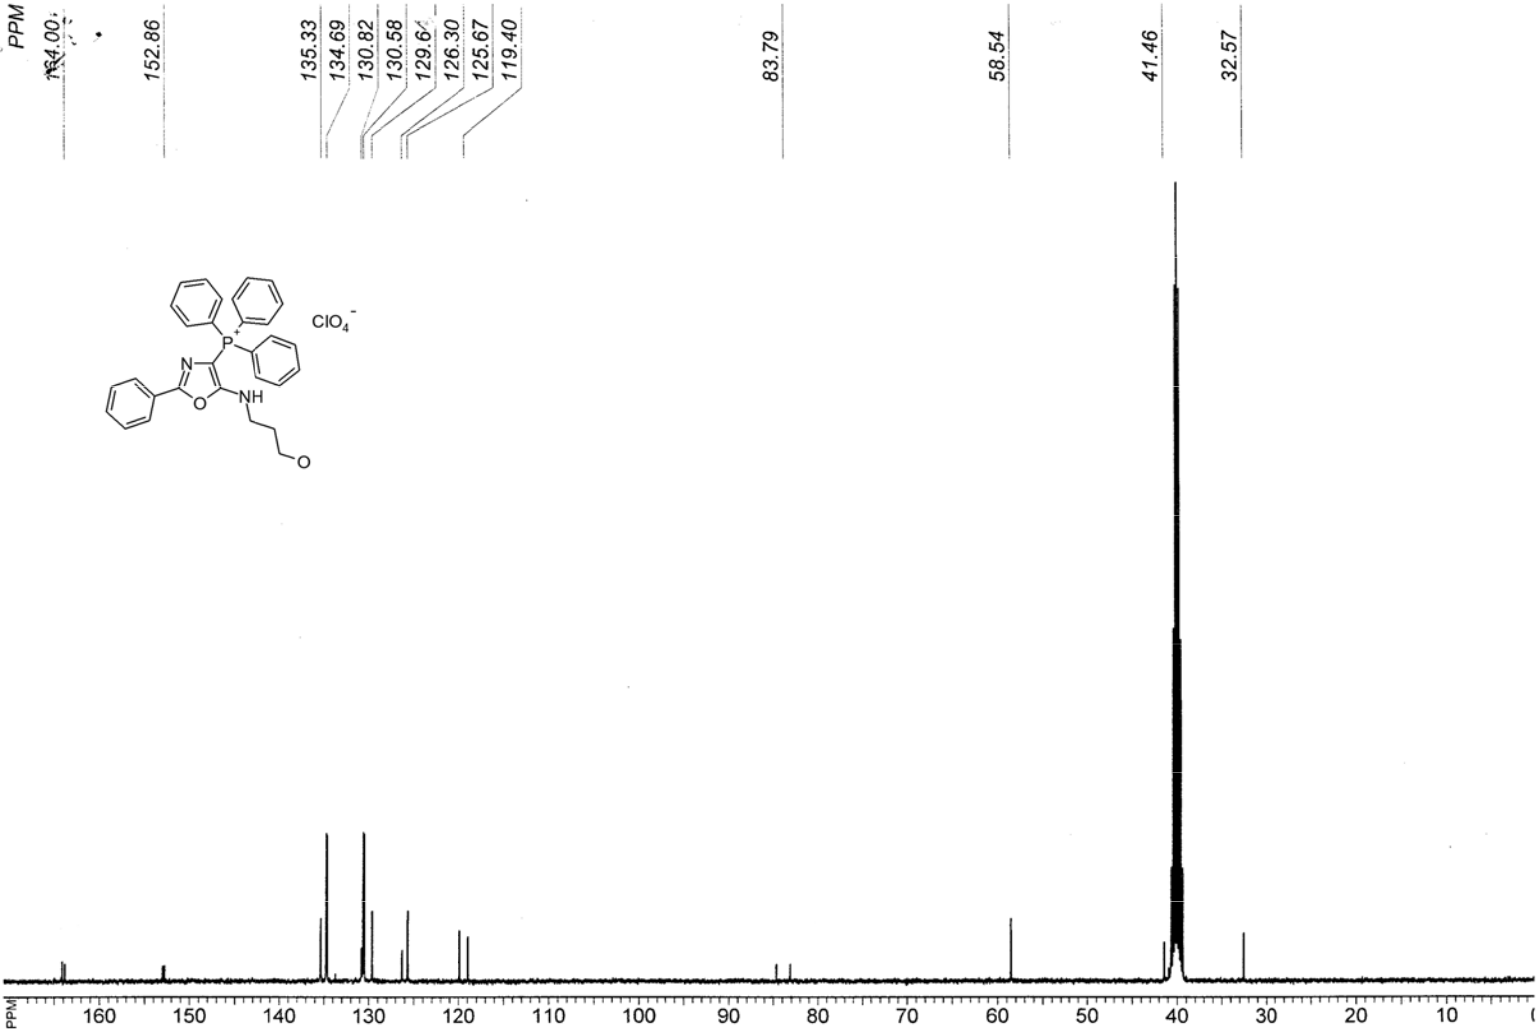


**Figure S 18.** 13C NMR spectrum of [5-(2-Hydroxypropyl)amino-2-phenyl-4-oxazolyl]triphenylphosphonium perchlorate (**3d**).


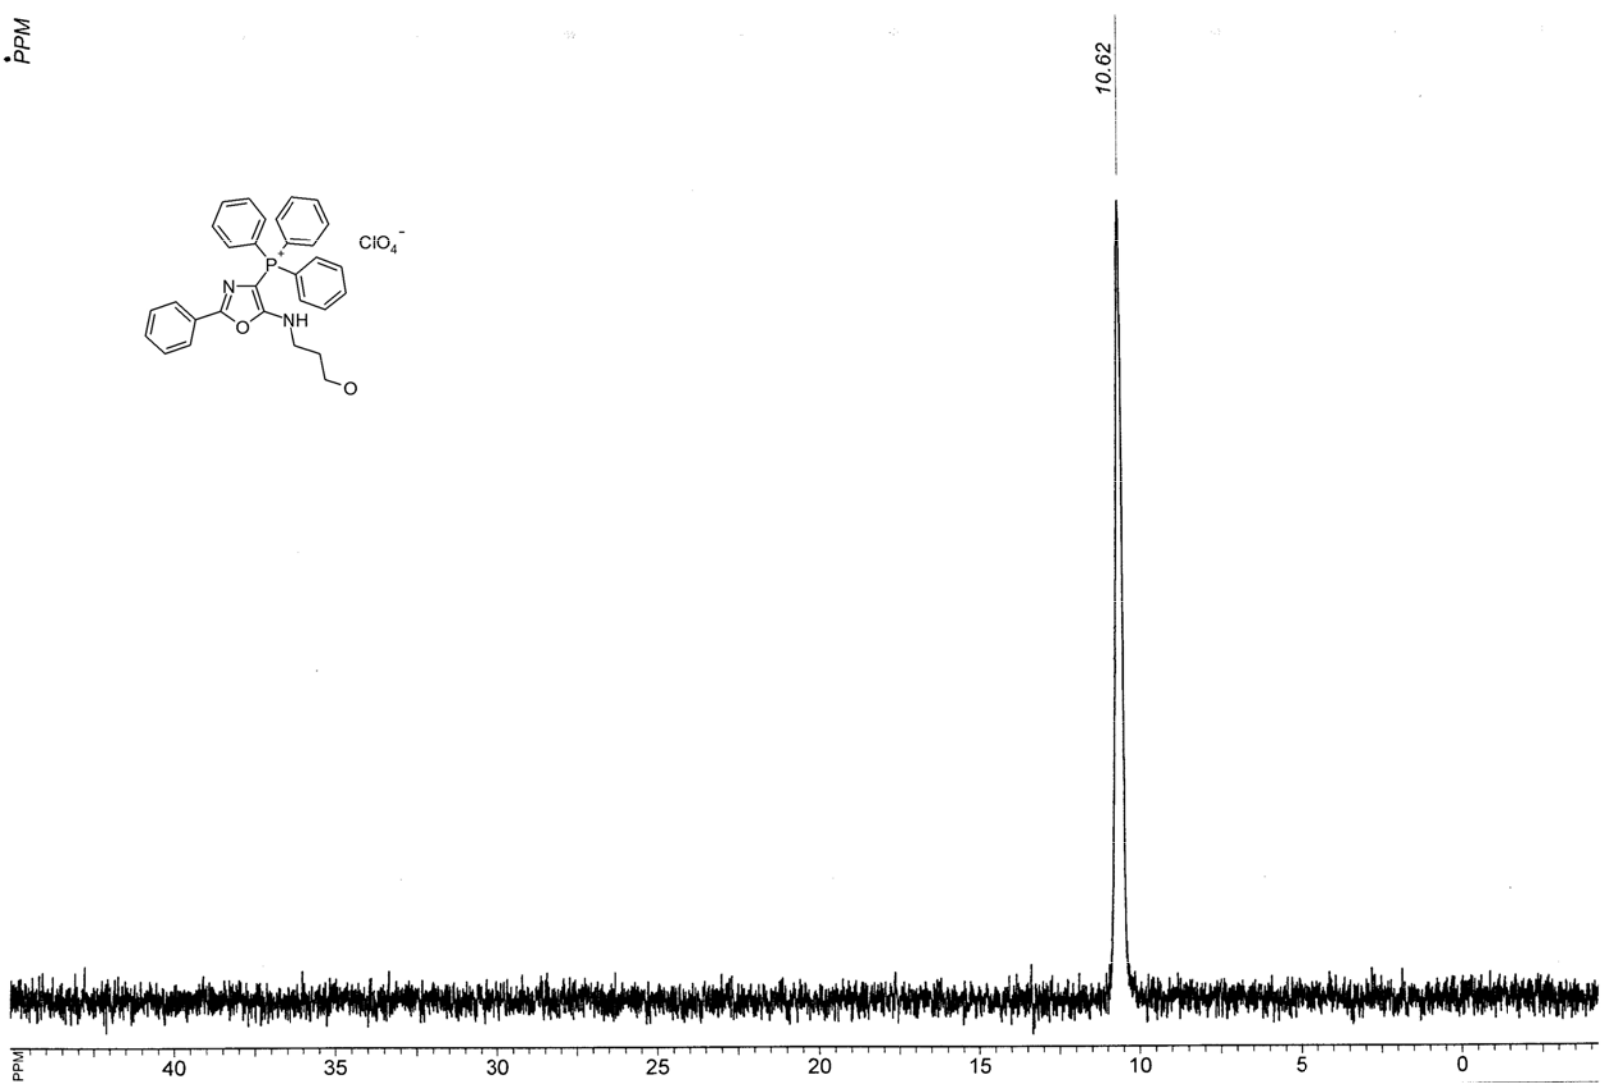


**Figure S 19.** 31P NMR spectrum of 5-(2-Hydroxypropyl)amino-2-phenyl-4-oxazolyl]triphenylphosphonium perchlorate (**3d**).


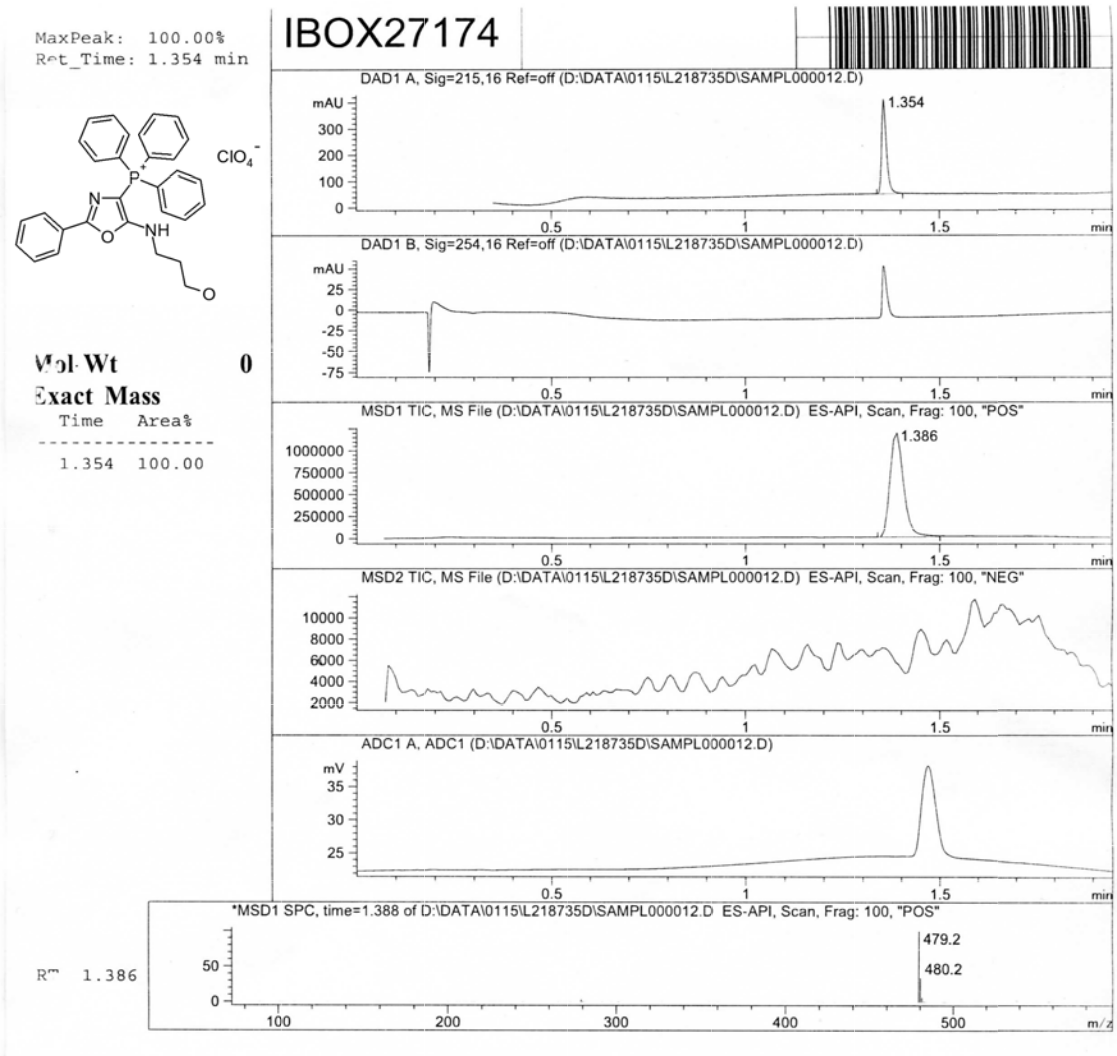


**Figure S 20.** LCMS analysis report of [5-(2-Hydroxypropyl)amino-2-phenyl-4-oxazolyl]triphenylphosphonium perchlorate (**3d**).


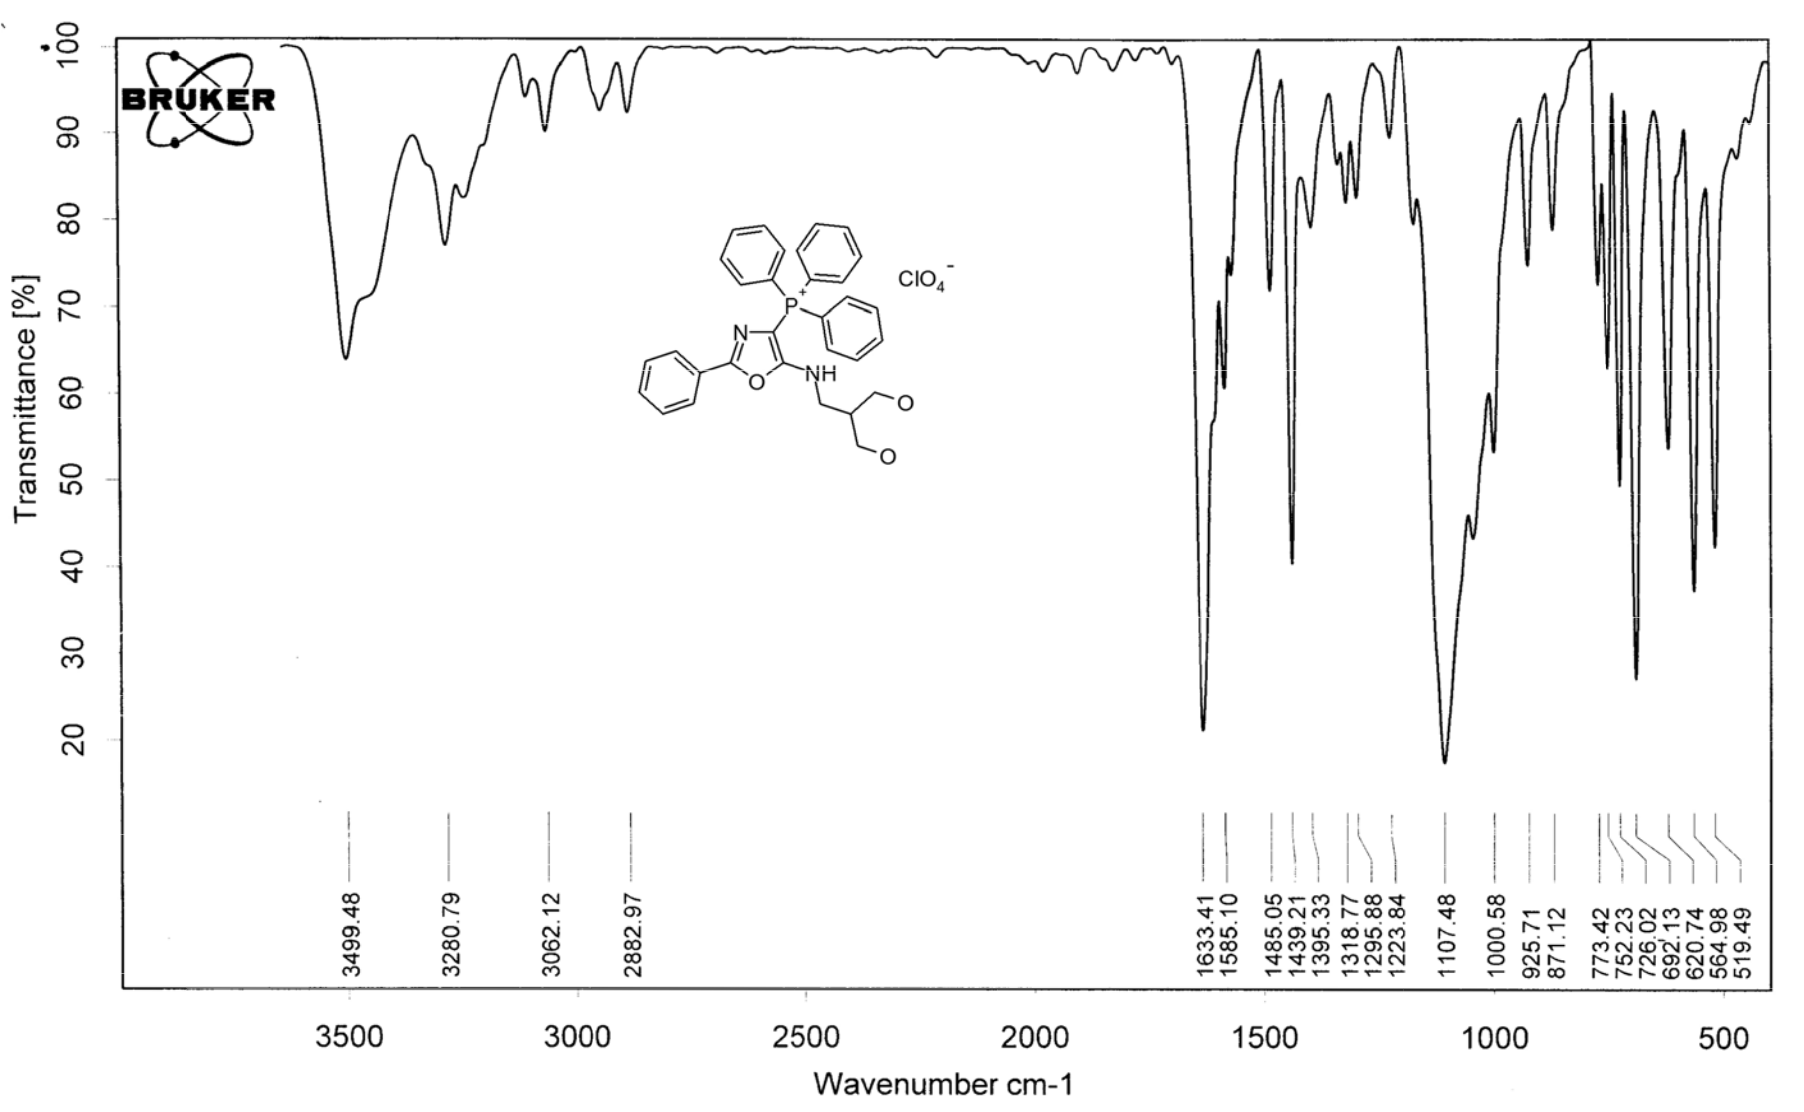


**Figure S 21.** IR (KBr) spectrum of[5-(2,3-Dihydroxypropyl)amino-2-phenyl-4-oxazolyl]triphenylphosphonium perchlorate (**3e**).


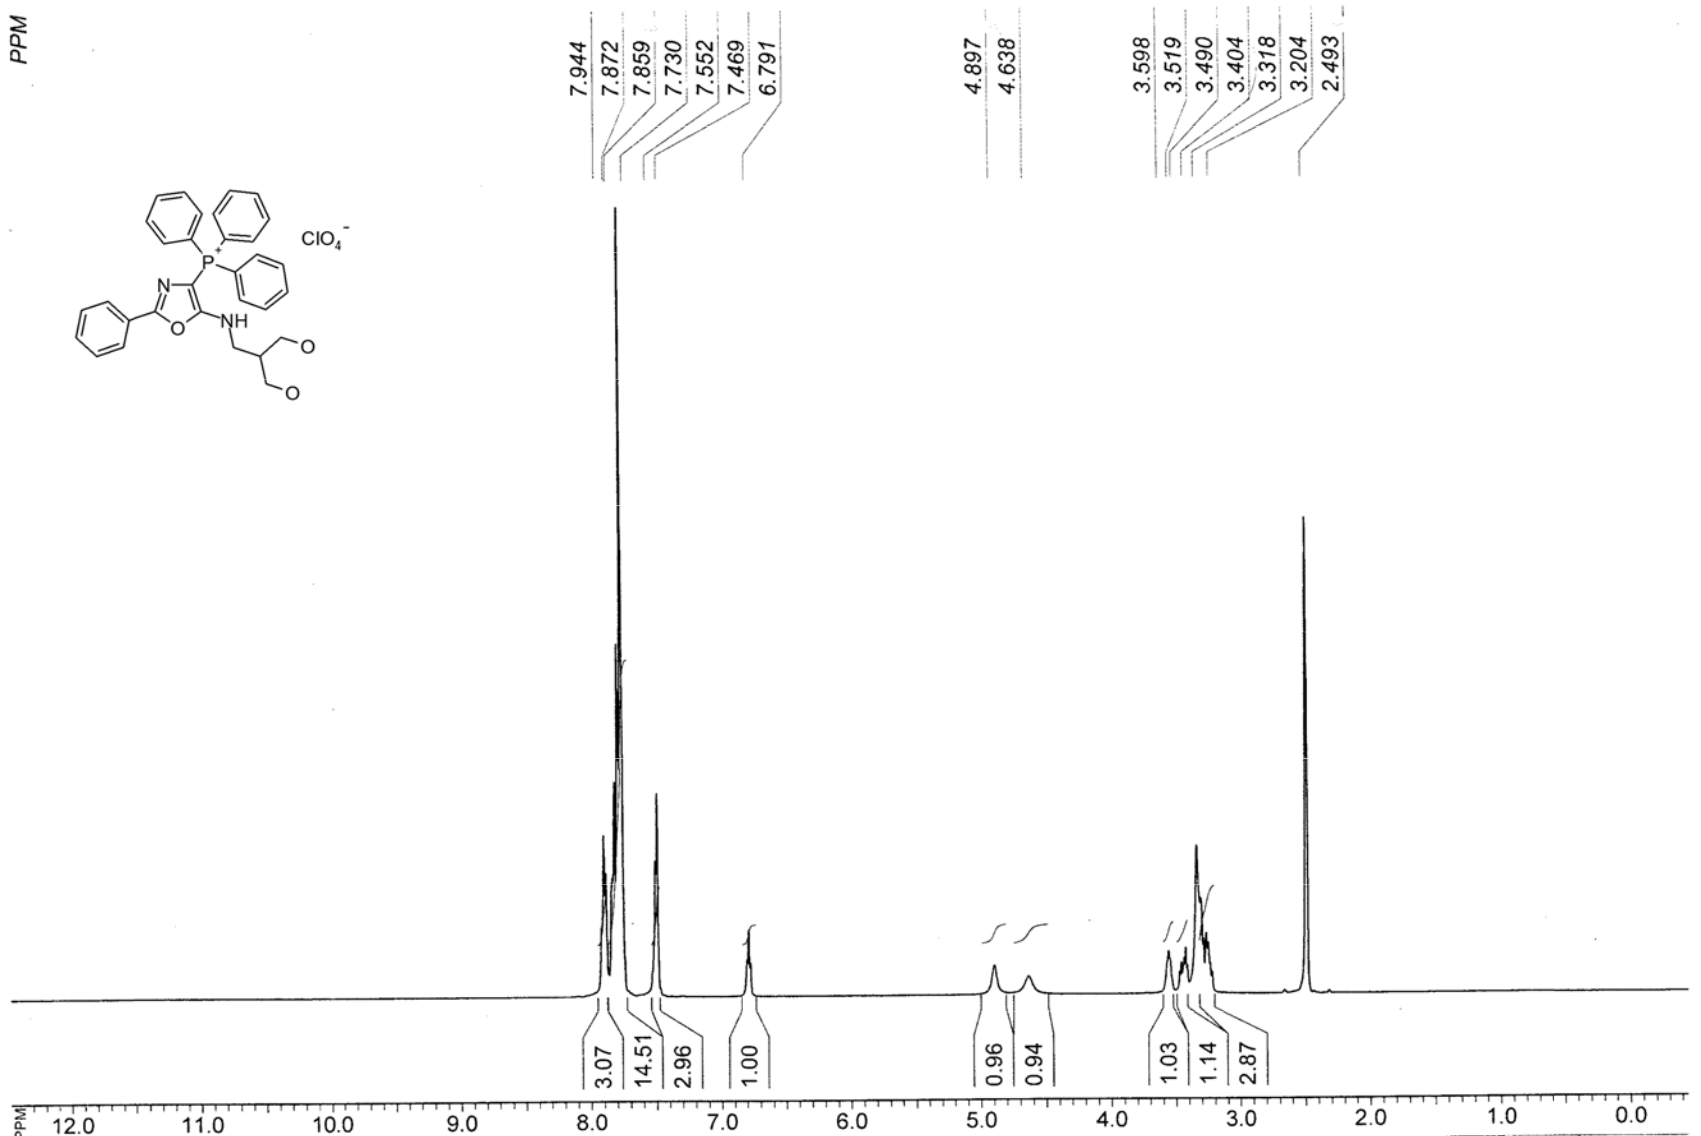


**Figure S 22.** 1H NMR spectrum of [5-(2,3-Dihydro ypropyl)amino-2-phenyl-4-oxazolyl]triphenylphosphonium perchlorate (**3e**).


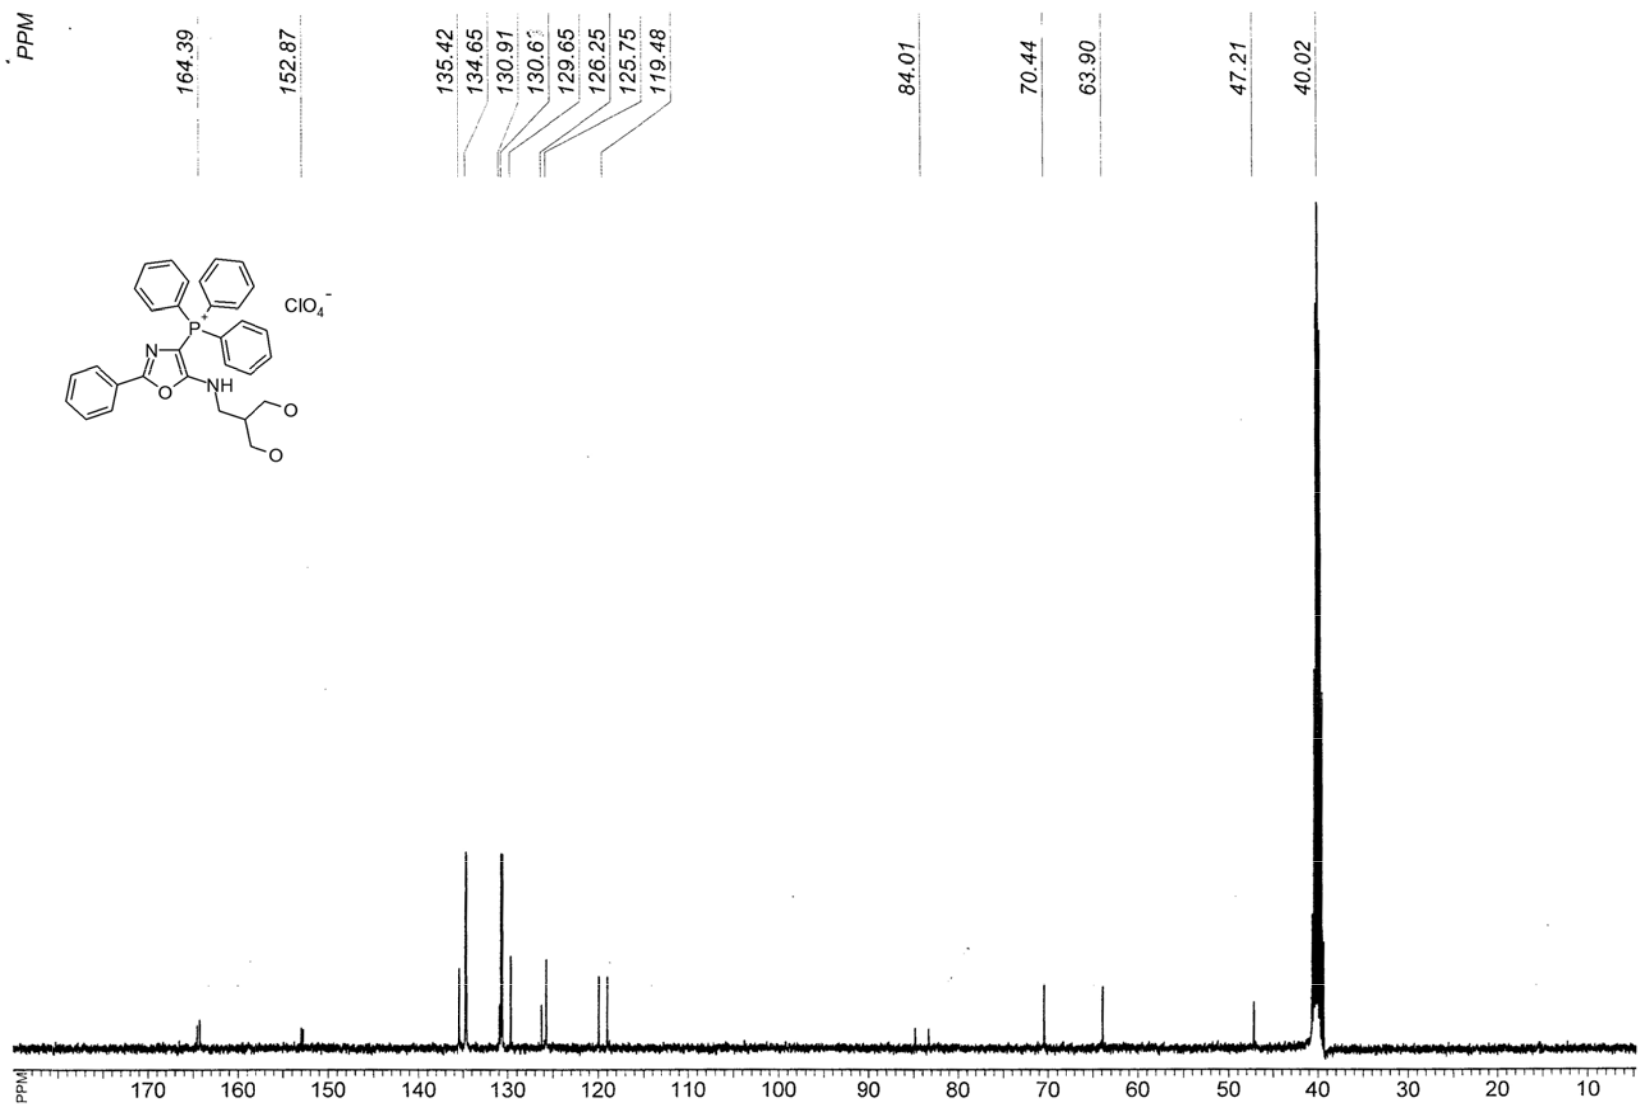


**Figure S 23.** 13C NMR spectrum of [5-(2,3-Dihydroxypropyl)amino-2-phenyl-4-oxazolyl]triphenylphosphonium perchlorate (**3e**).


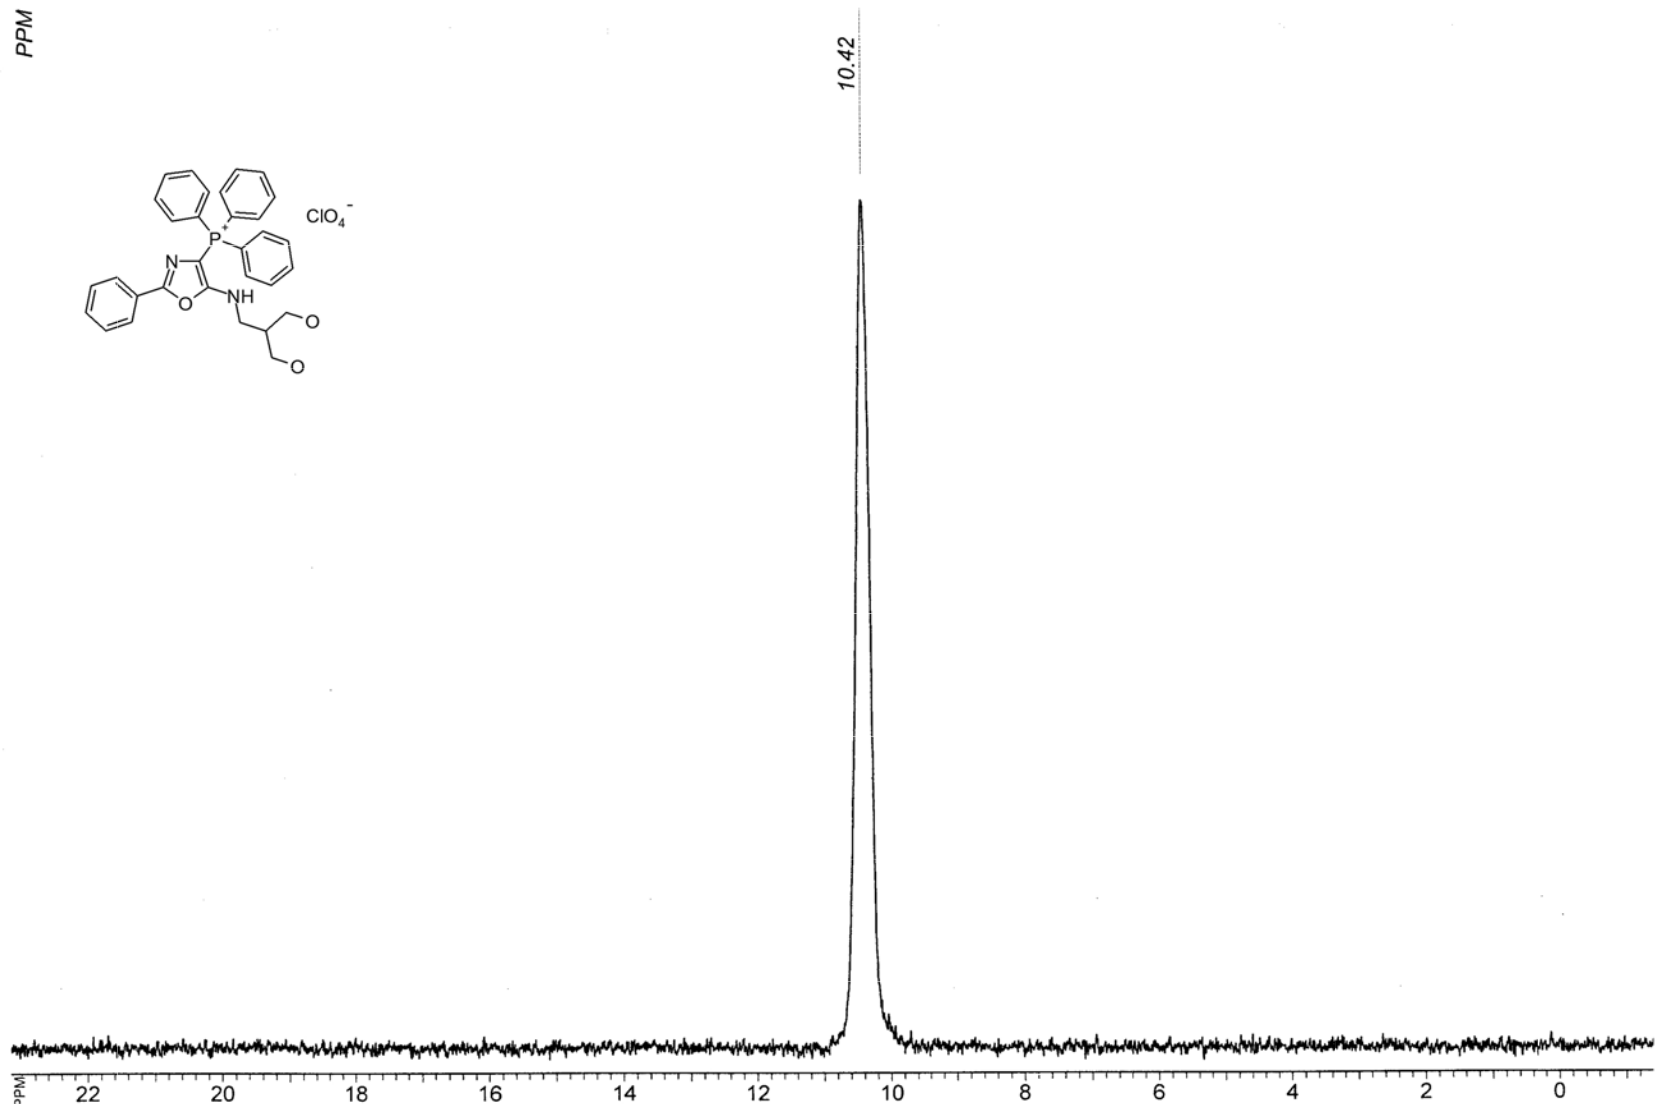


**Figure S 24.** 31P NMR spectrum of 5-(2,3-Dihydroxypropyl)amino-2-phenyl-4-oxazolyl]triphenylphosphonium perchlorate (**3e**).


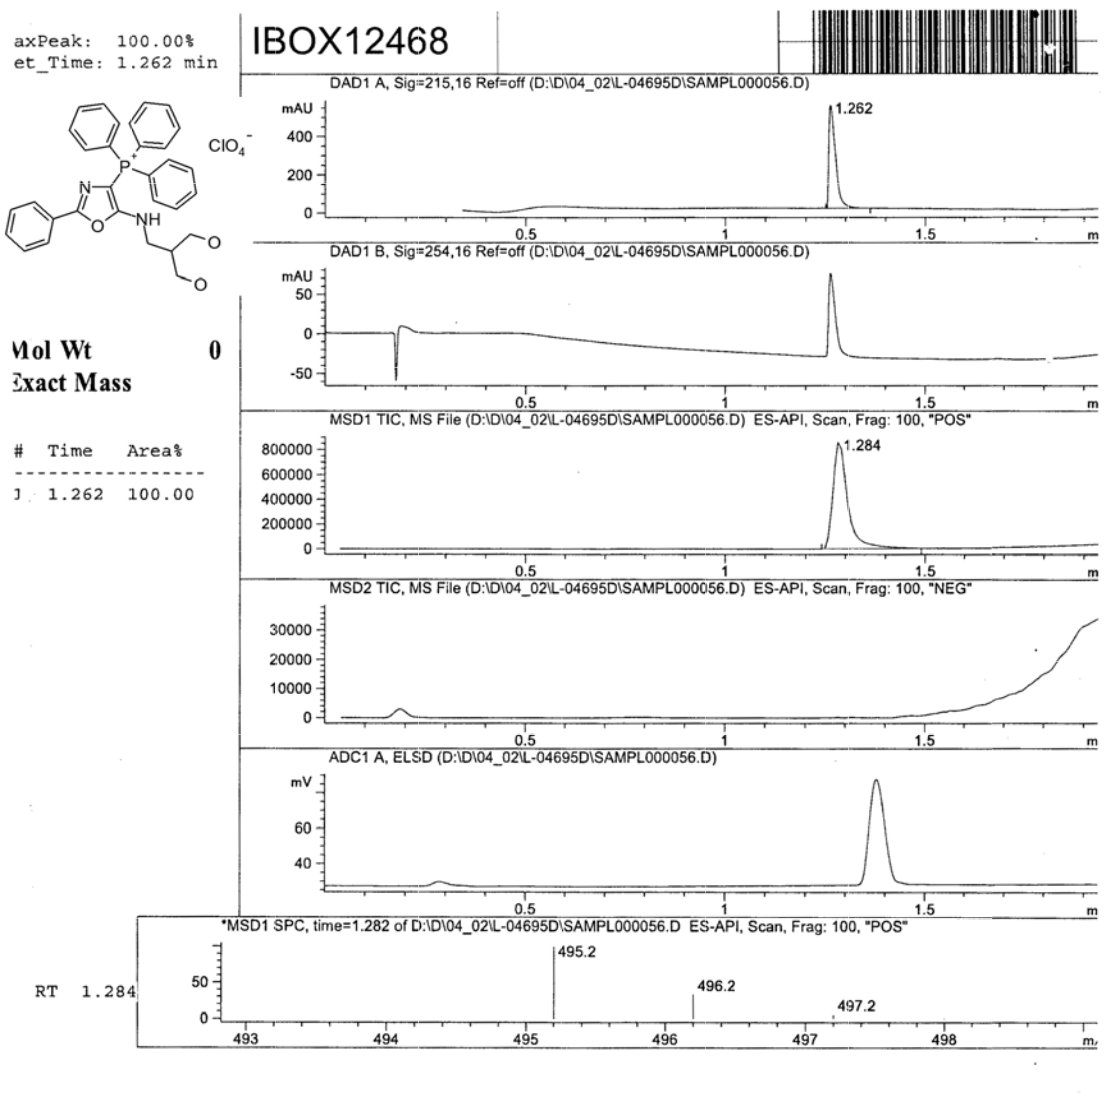


**Figure S 25.** LCMS analysis report of [5-(2,3-Dihydroxypropyl)amino-2-phenyl-4oxazolyl]triphe ylphosphonium perchlorate (**3e**).


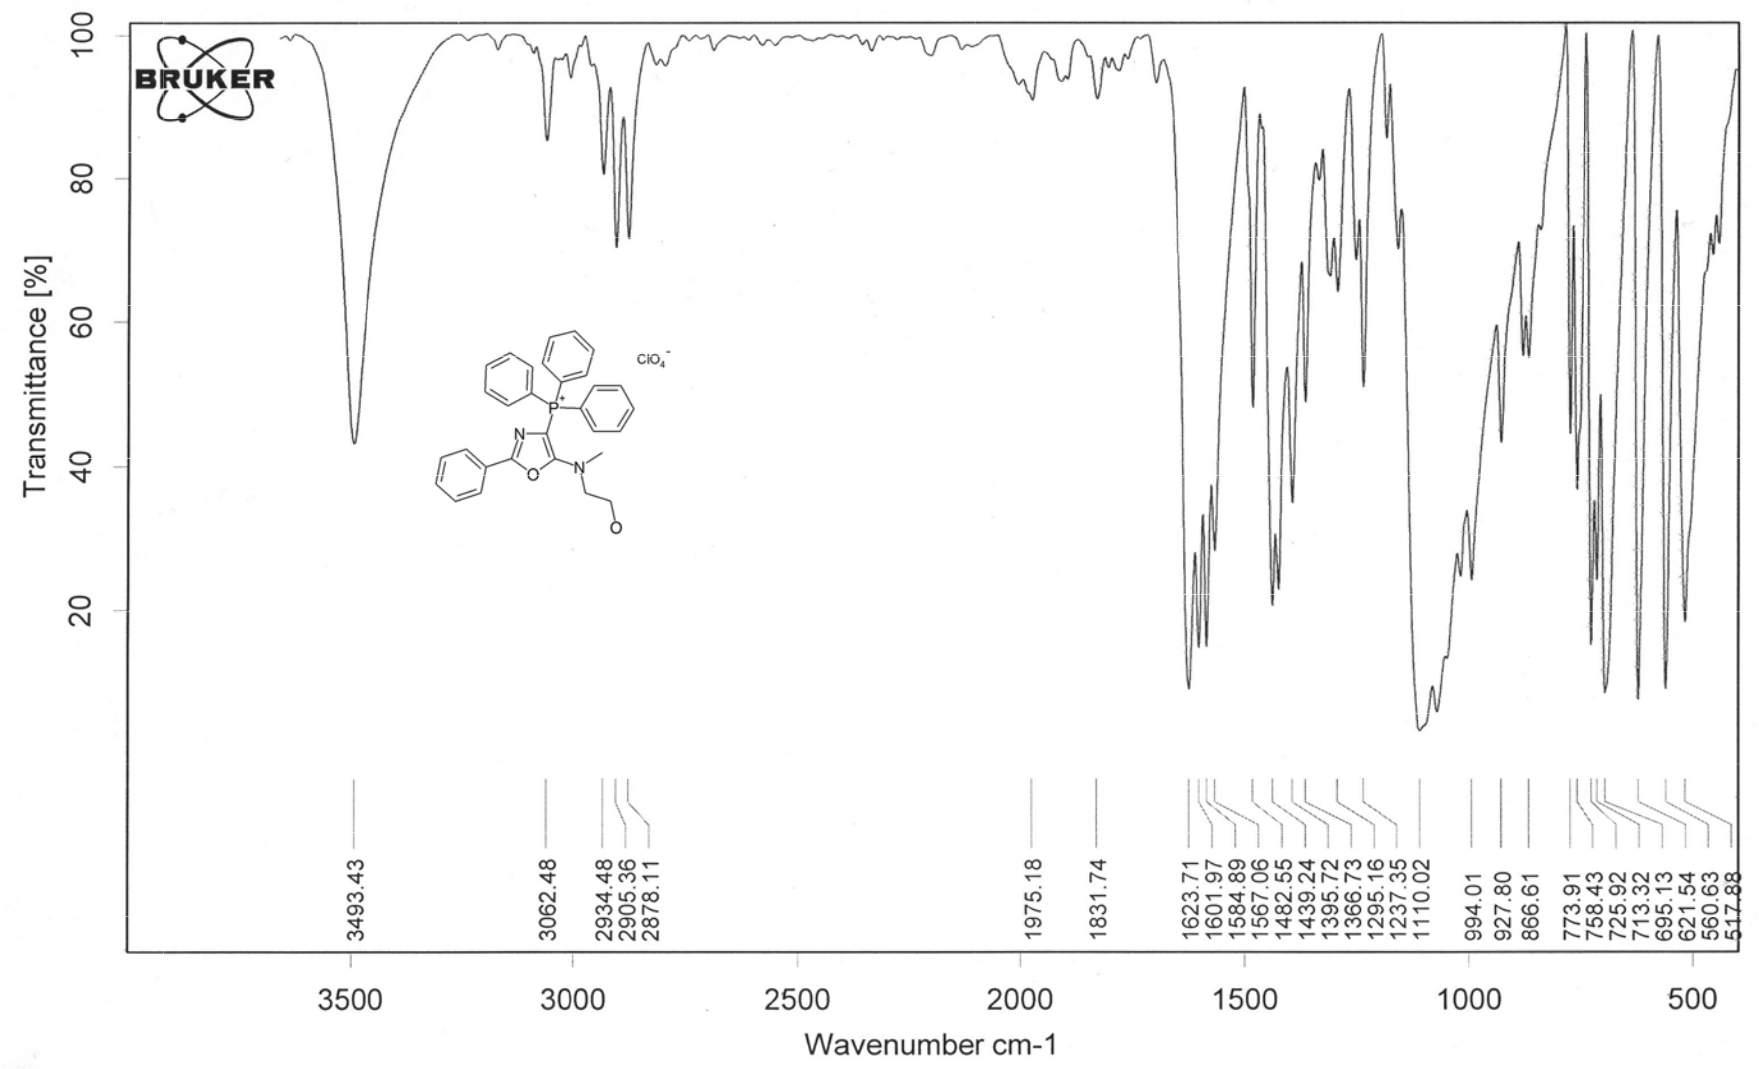


**Figure S 26.** IR (KBr) spectrum of[5-(2-Hydroxyethyl)methylamino-2-phenyl-4-oxazolyl]triphenylphosphoniumperchlorate (**3f**).


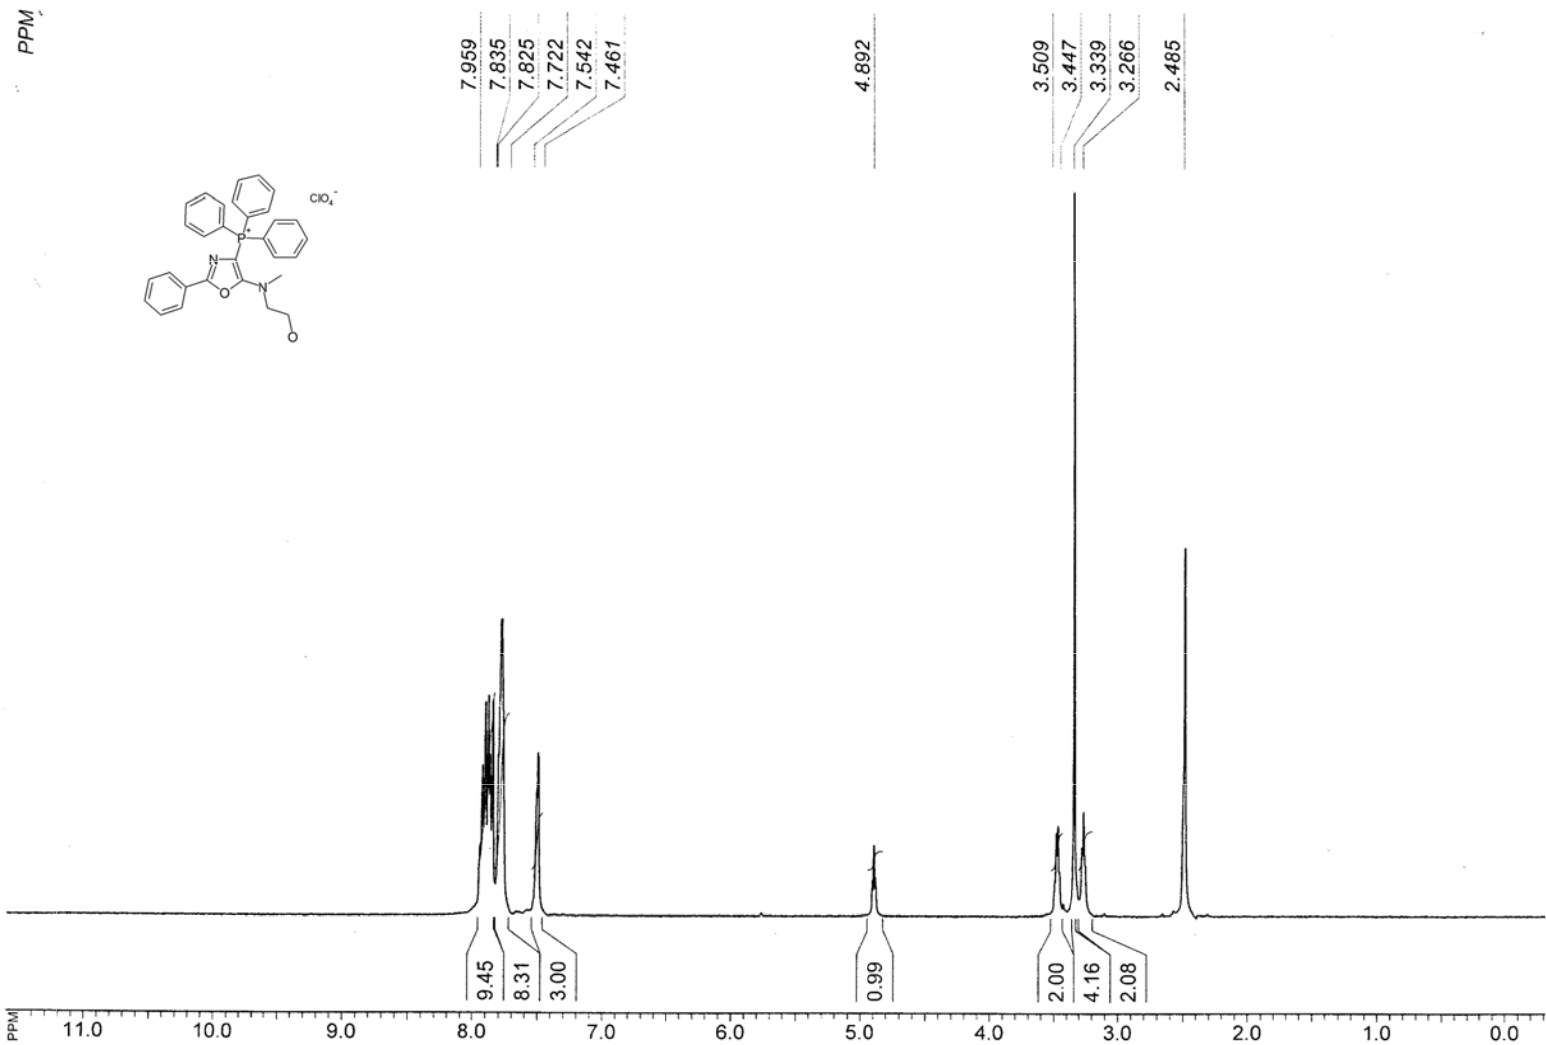


**Figure S 27.** 1H NMR spectrum of [5-(2-Hydroxyethyl)methylamino-2-phenyl-4-o azolyl]triphenylphosphoniumperchlorate (**3f**).


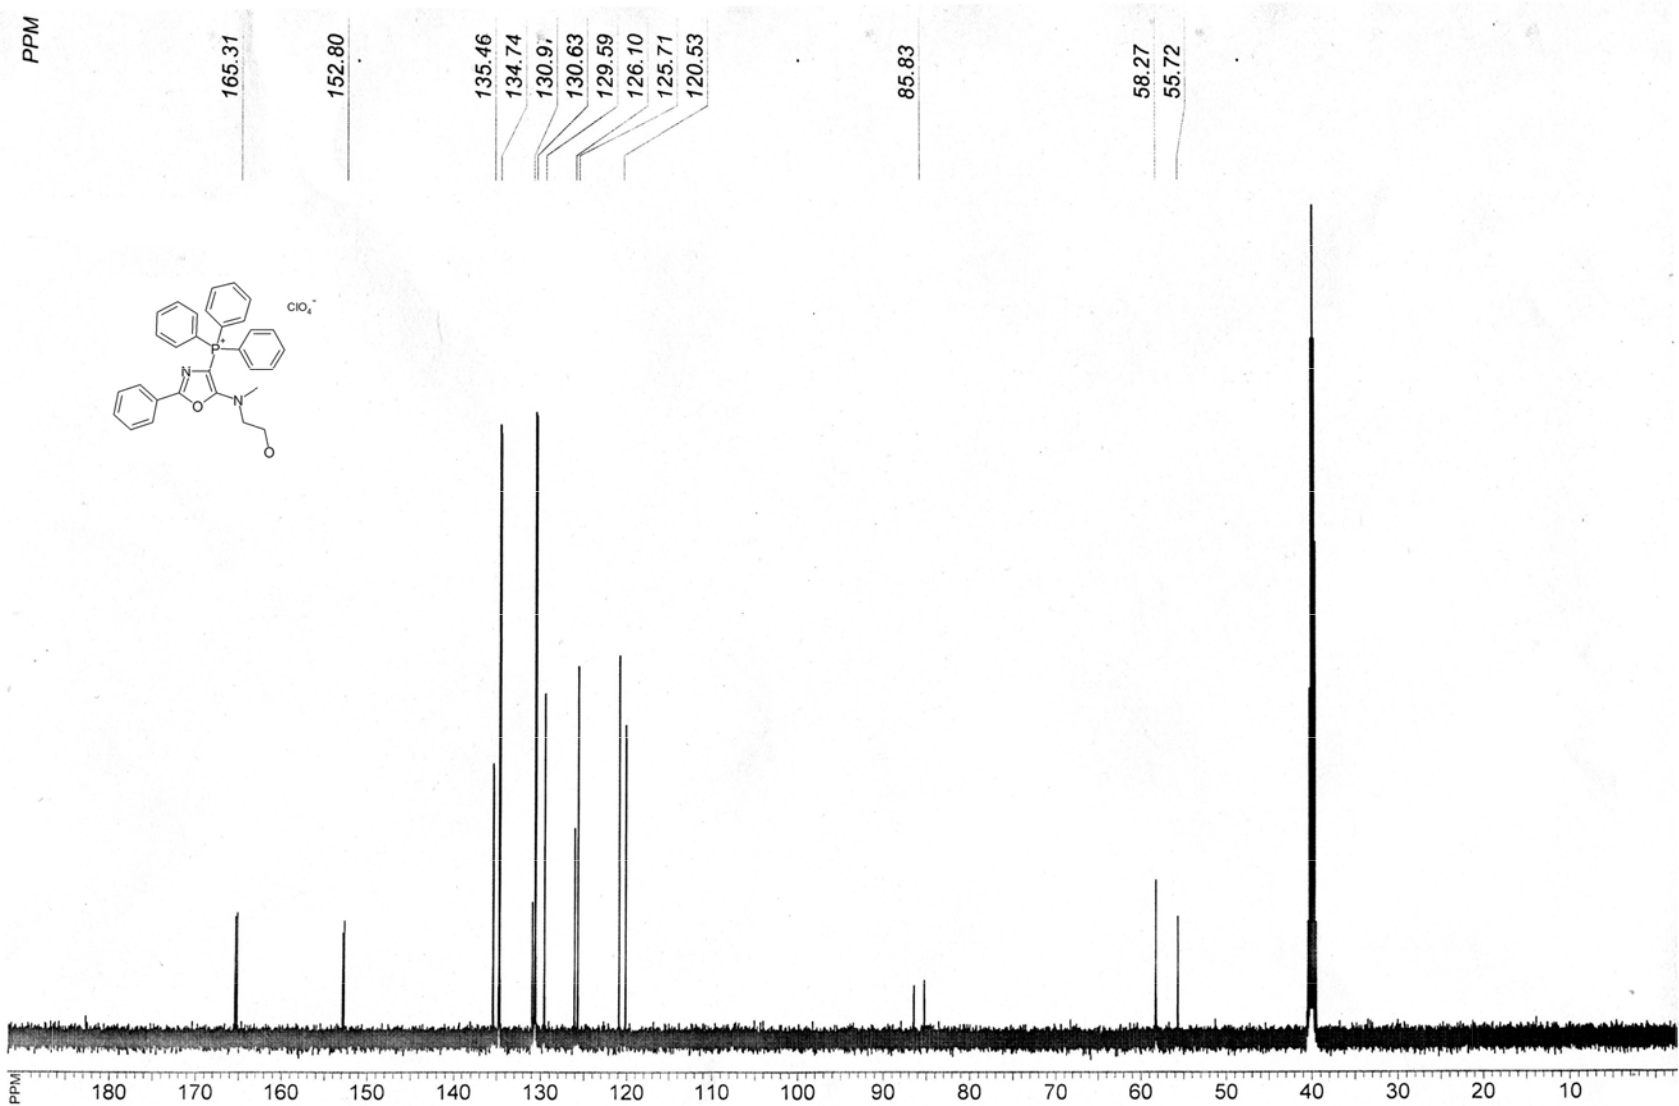


**Figure S 28.** 13C NMR spectrum of [5-(2-Hydroxyethyl)methylamino-2-phenyl-4-oxazolyl]triphenylphosphoniumperchlorate (**3f**).


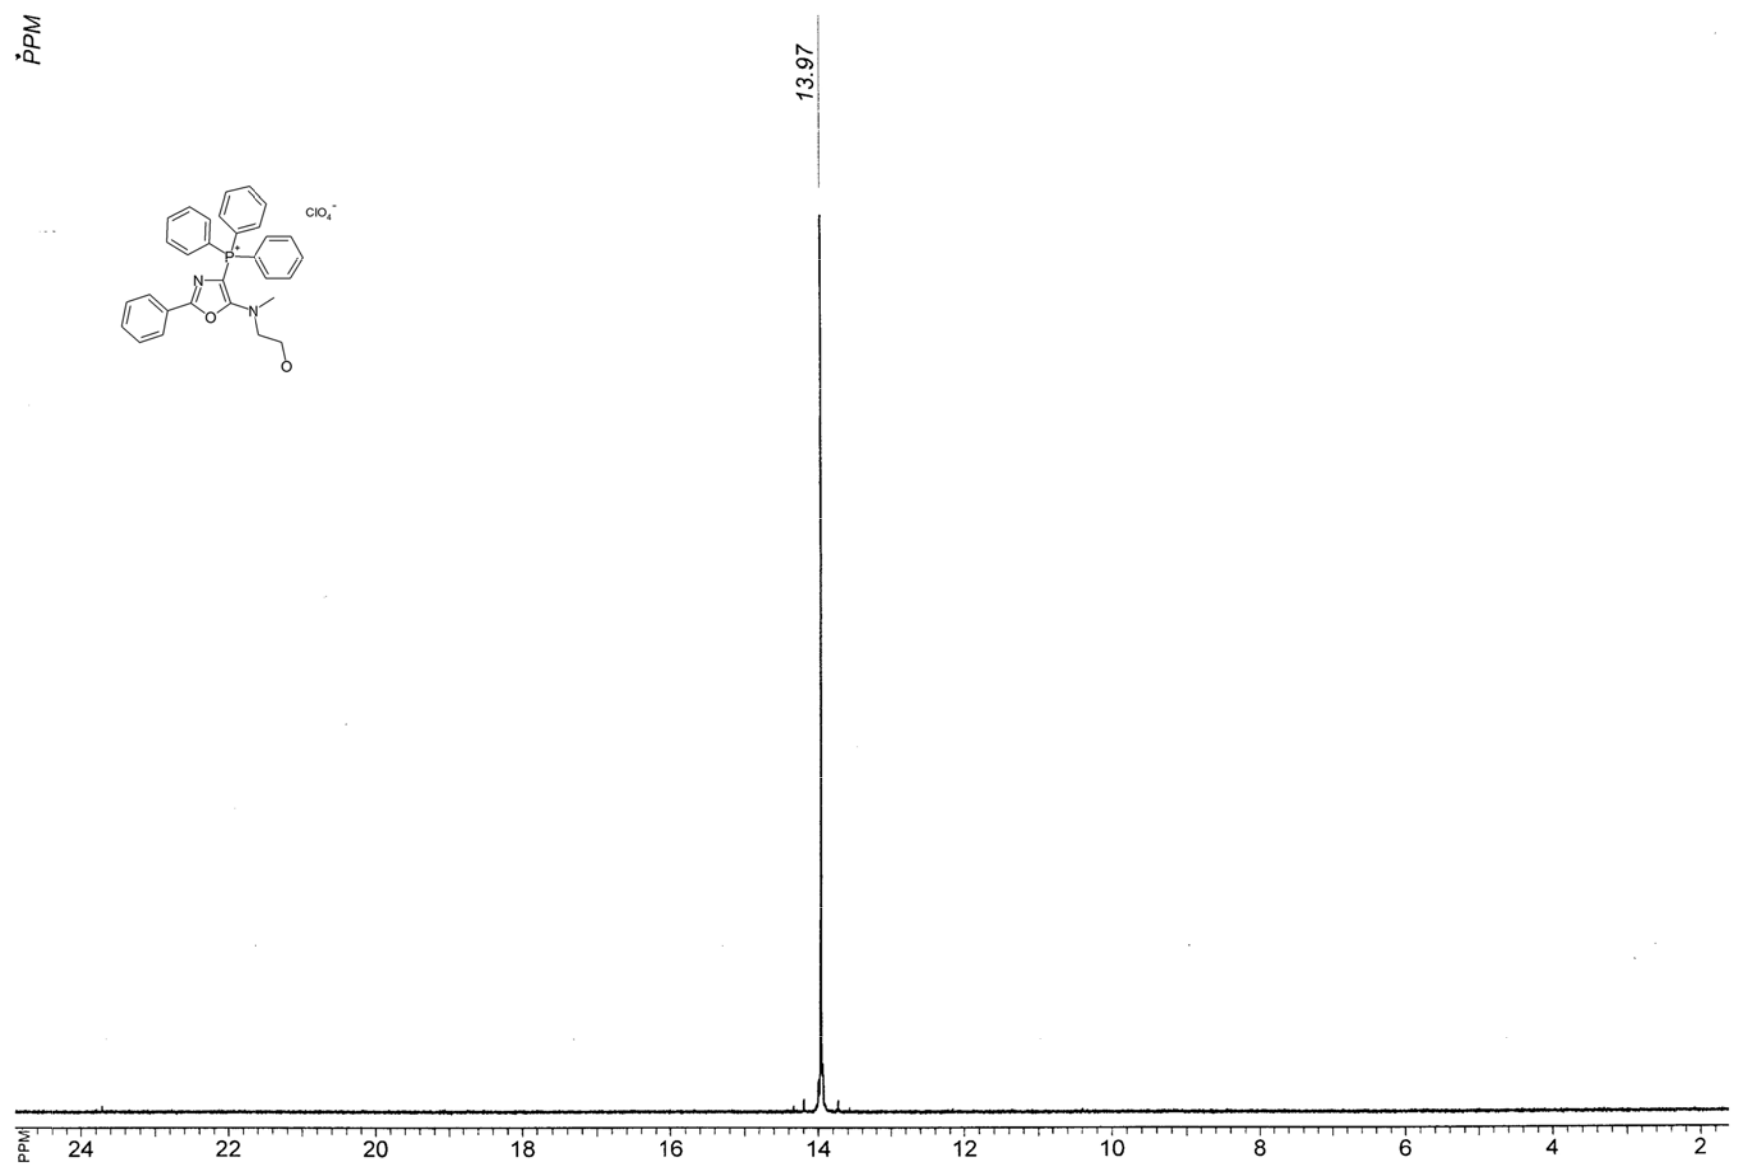


**Figure S 29.** 31P NMR spectrum of 5-(2-Hydroxyethyl)methylamino-2-phenyl-4-oxazolyl]triphenylphosphonium perchlorate (**3f**).


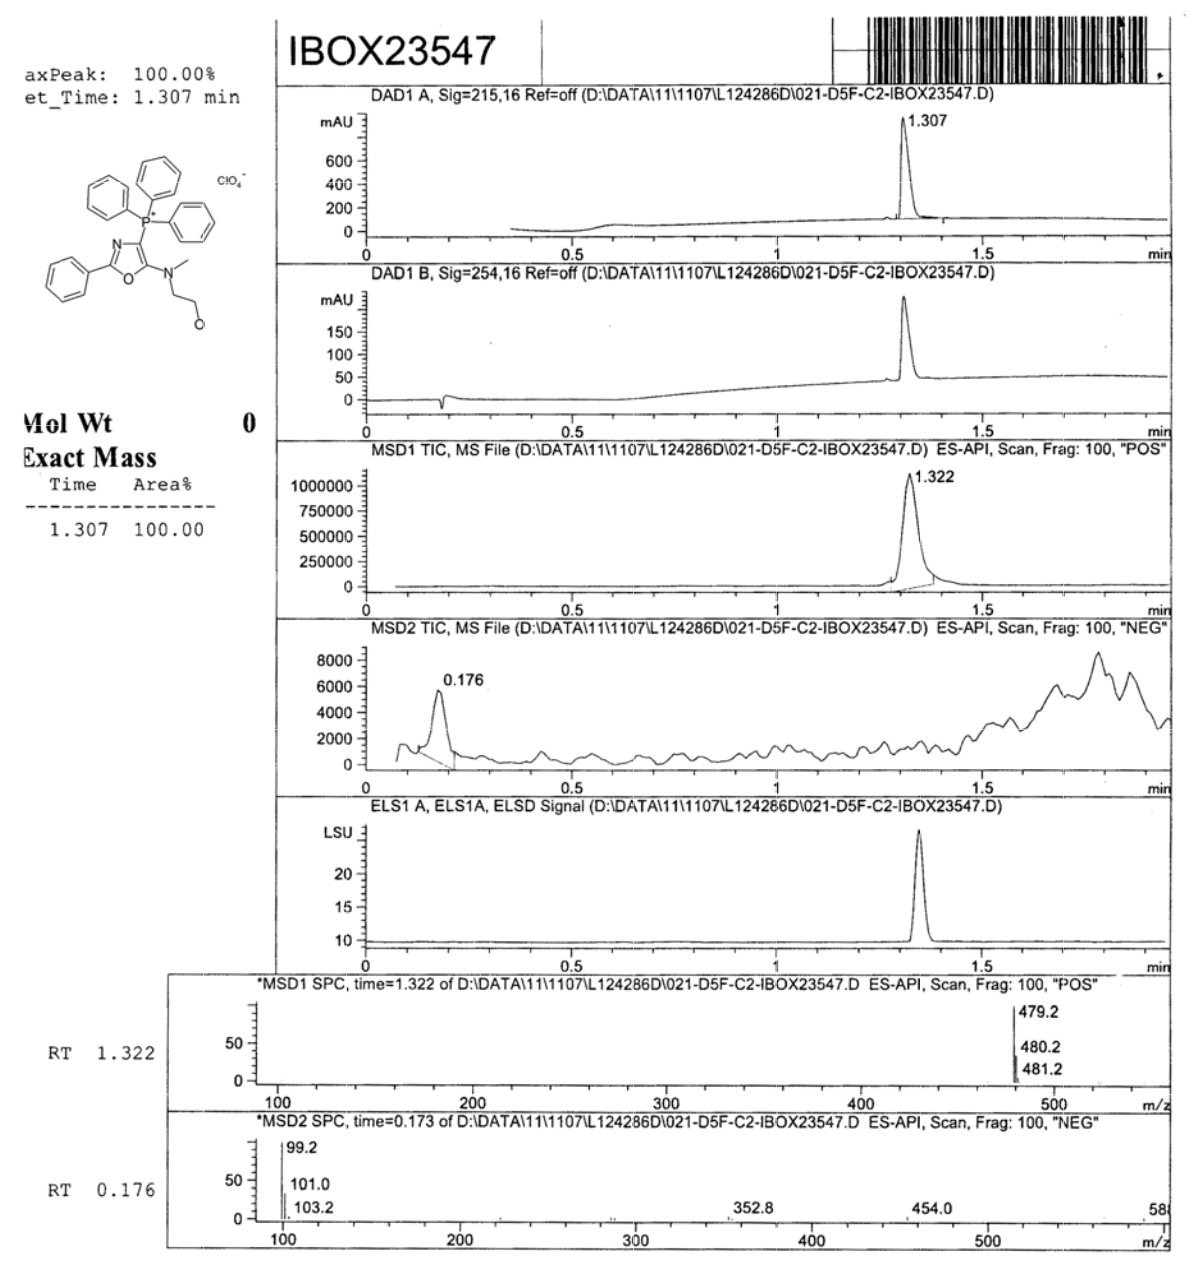


**Figure S 30.** LCMS analysis report of [5-(2-Hydroxyethyl)methylamino-2-phenyl-4-oxazolyl]tripheylphosphonium perchlorate (**3f**).


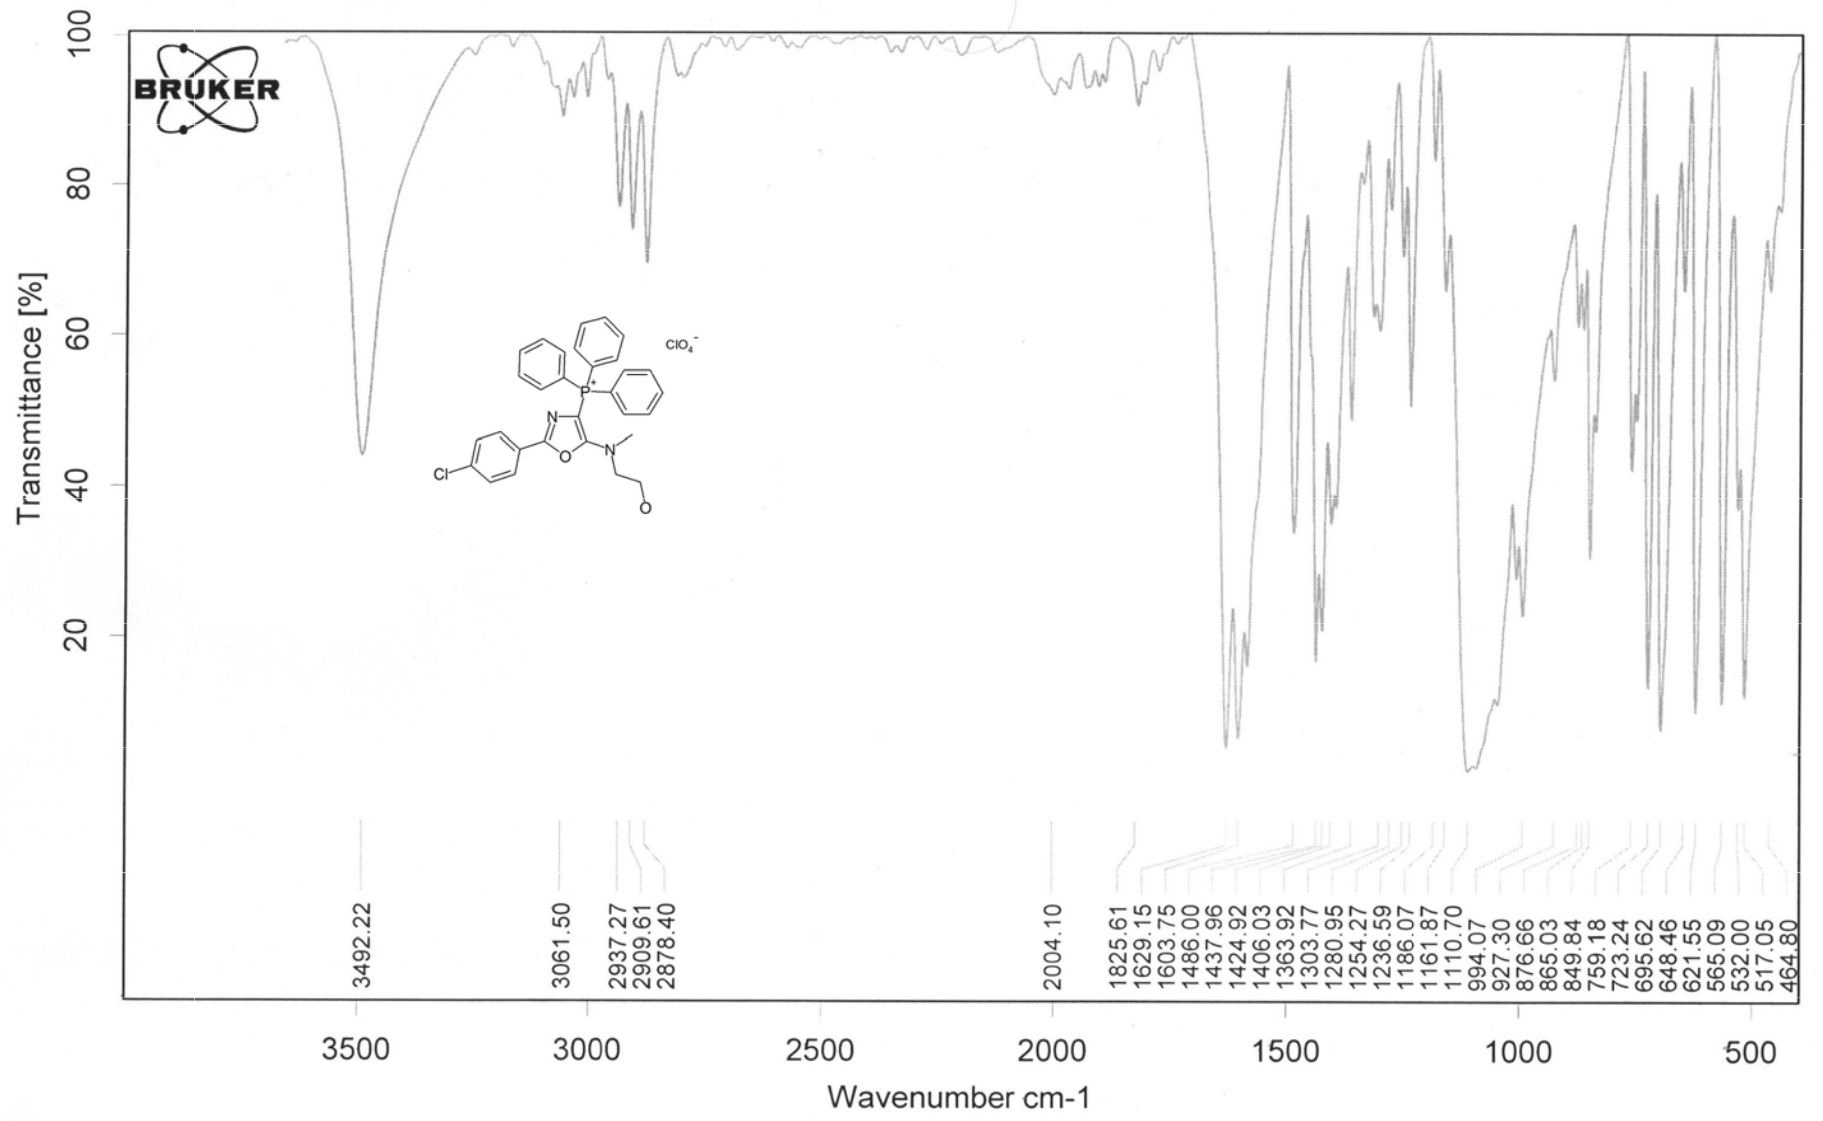


**Figure S 31.** IR (KBr) spectrum of[2-(4-Chlorophenyl)-5-(2-hydroxyethyl)methylamino-4-oxazolyl]triphenylphosphonium perchlorate (**3h**).


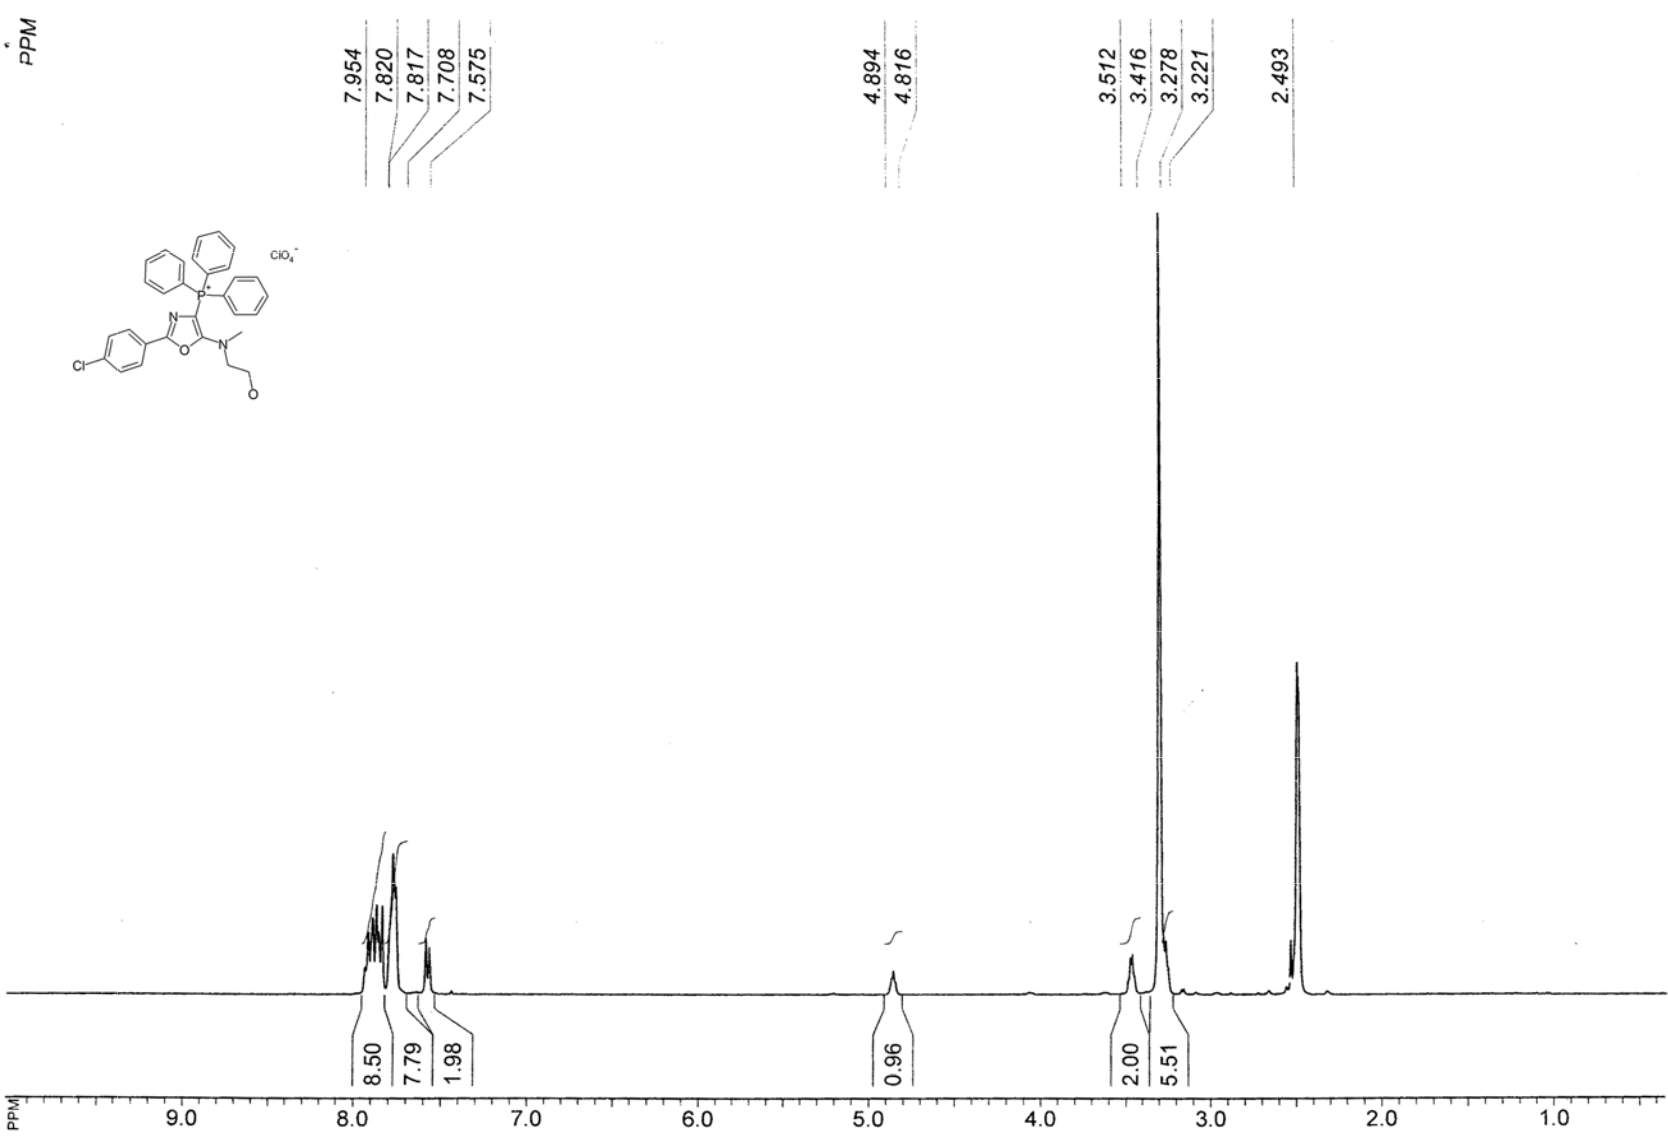


**Figure S 32.** 1H NMR spectrum of [2-(4-Chlorophenyl)-5-(2-hydroxyethyl)methylamino-4-oxazolyl]triphenylphosphonium perchlorate (**3h**).


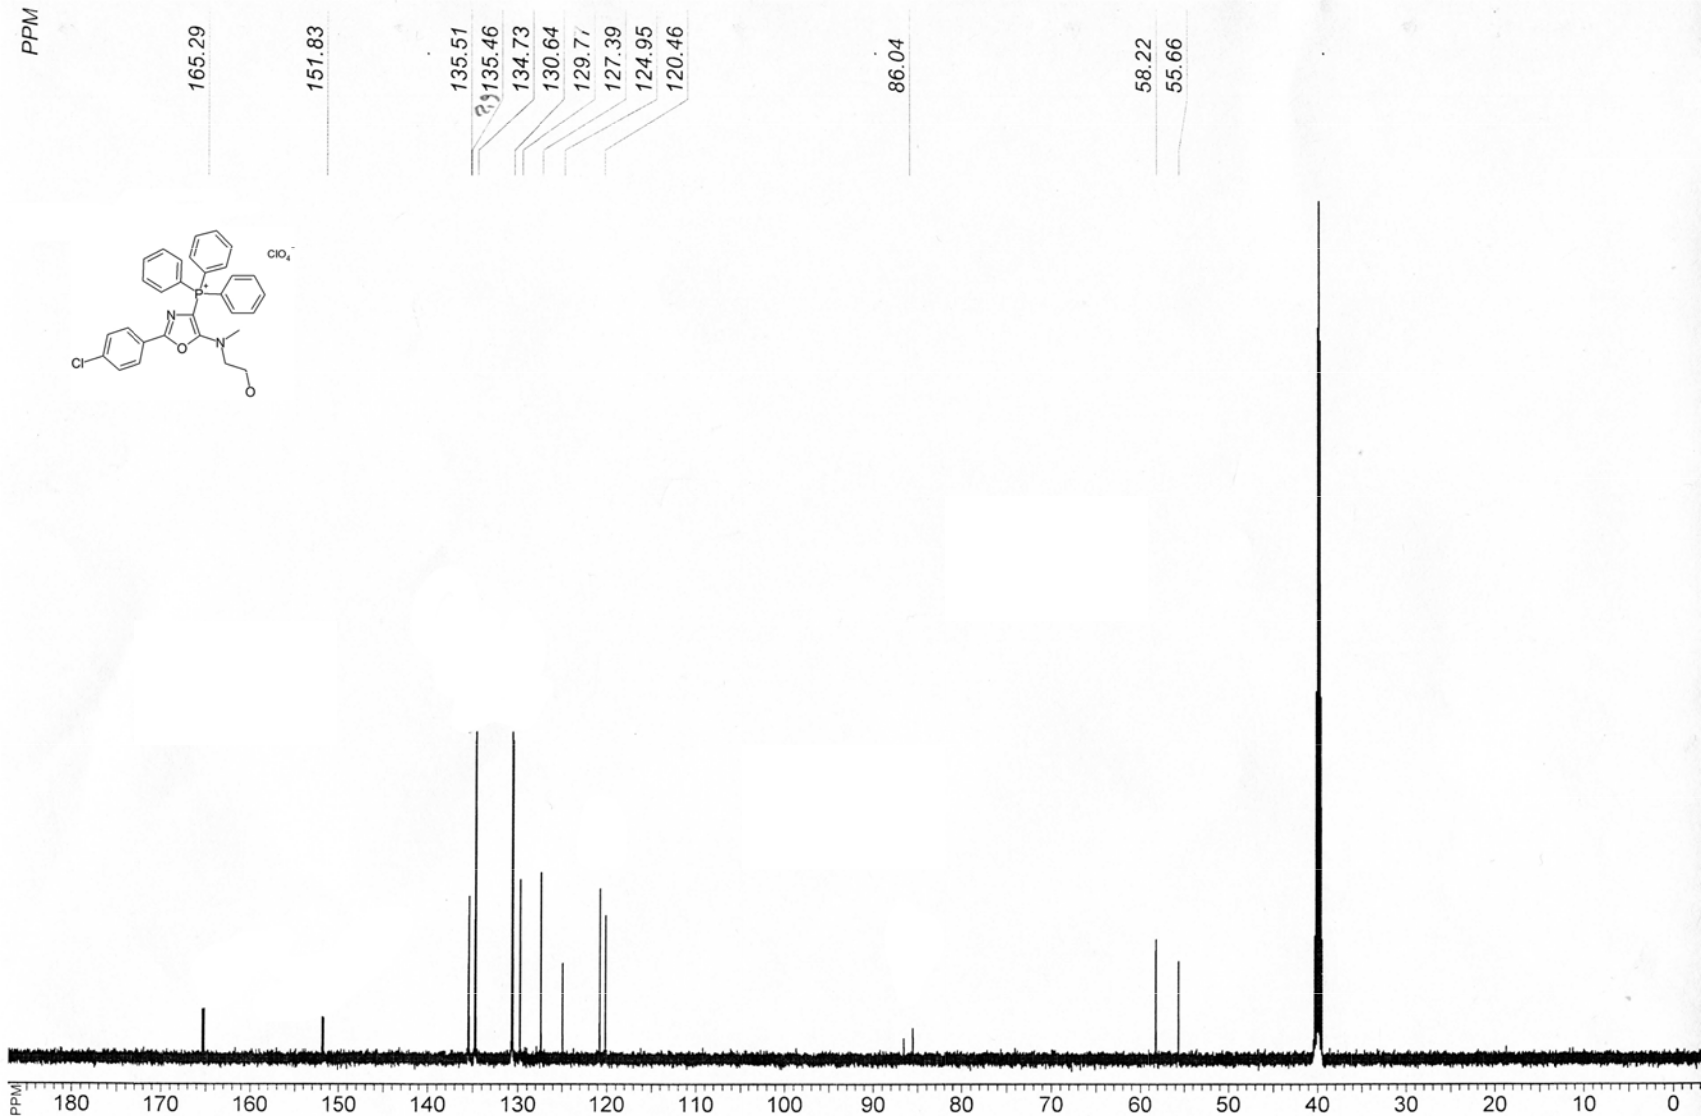


**Figure S 33.** 13C NMR spectrum of [2-(4-Chlorophenyl)-5-(2-hydroxyethyl)methylamino-4-oxazolyl]triphenylphosphonium perchlorate (**3h**).


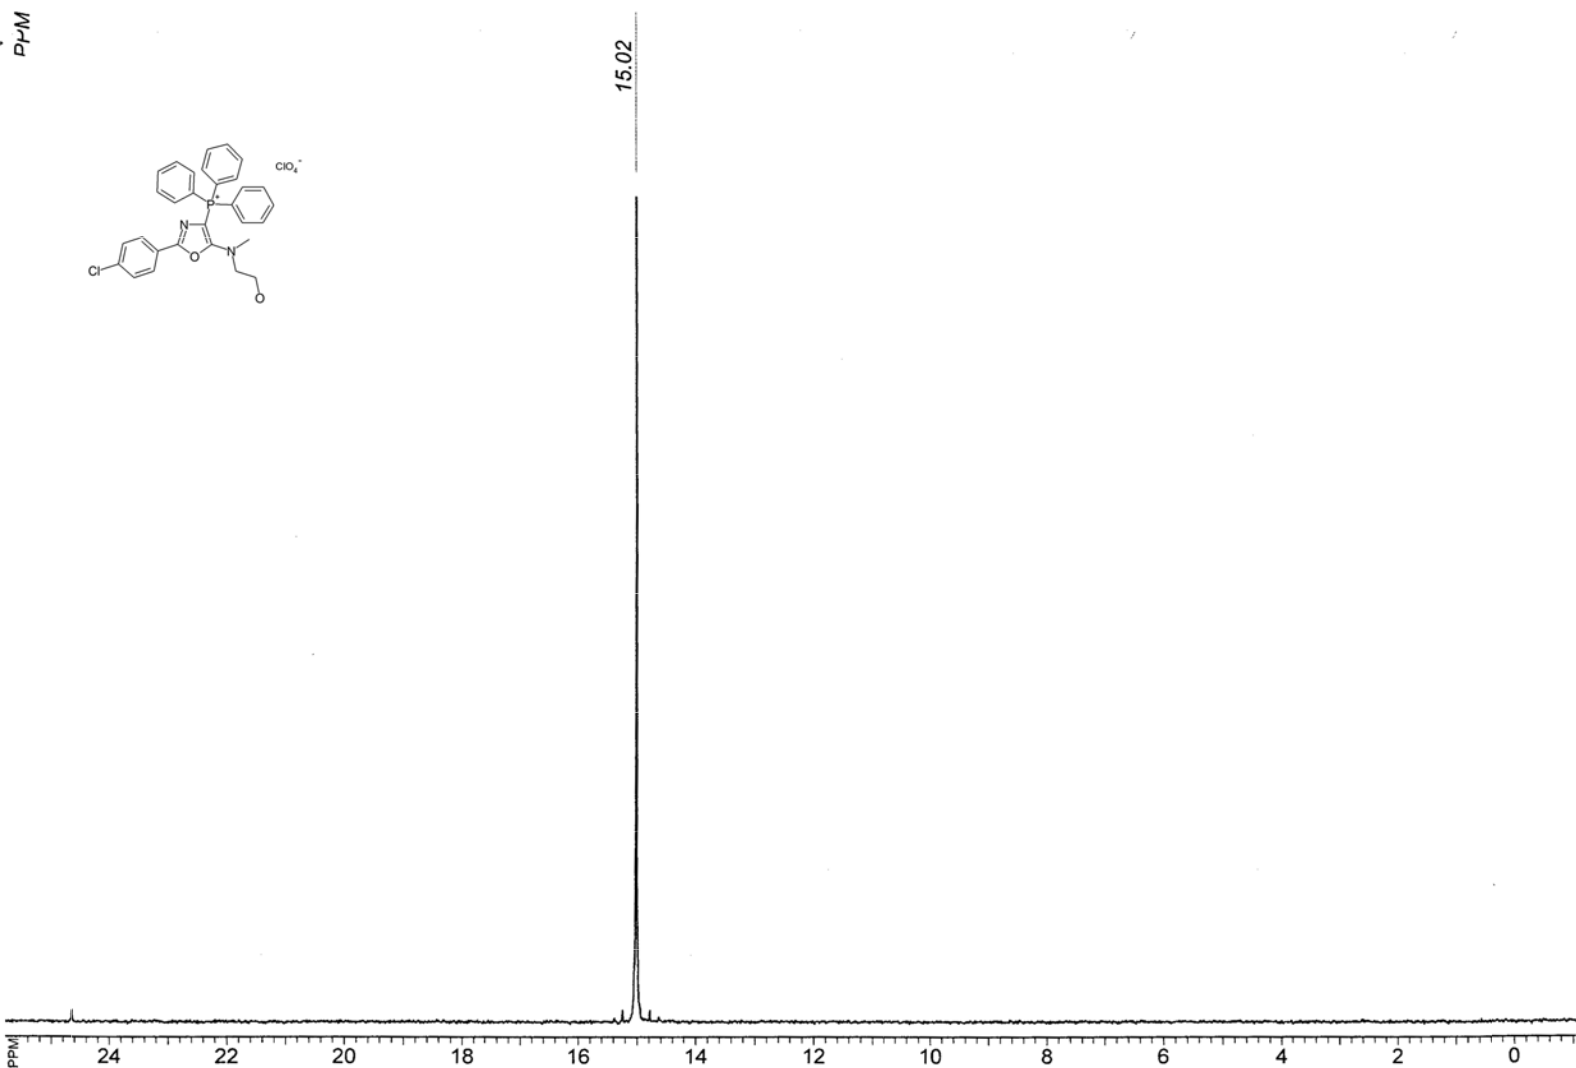


**Figure S 34.** 31P NMR spectrum of 2-(4-Chlorophenyl)-5-(2-hydroxyethyl)methyl mino-4-oxazol l]triphenylphosphonium perchlorate (**3h**).


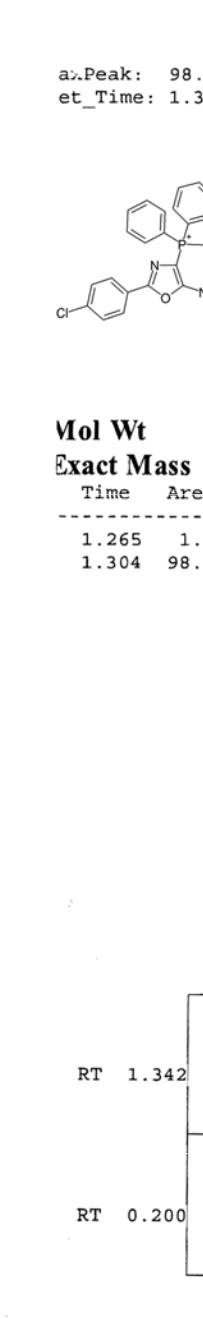


**Figure S 35.** LCoxazolyl]triphe нydroxyethyl)m

-MS analy is report of [2-(4 -Chlo rophenyl)- 5-(2-hydrox yethyl)methylamino-4 - ylphosphonium perchlorate [2-(4-chlorophe yl) -5-[(2-ethylamino ]-4-oxazol yl]triphenyl-phosphonium perchlorate (**3h**).


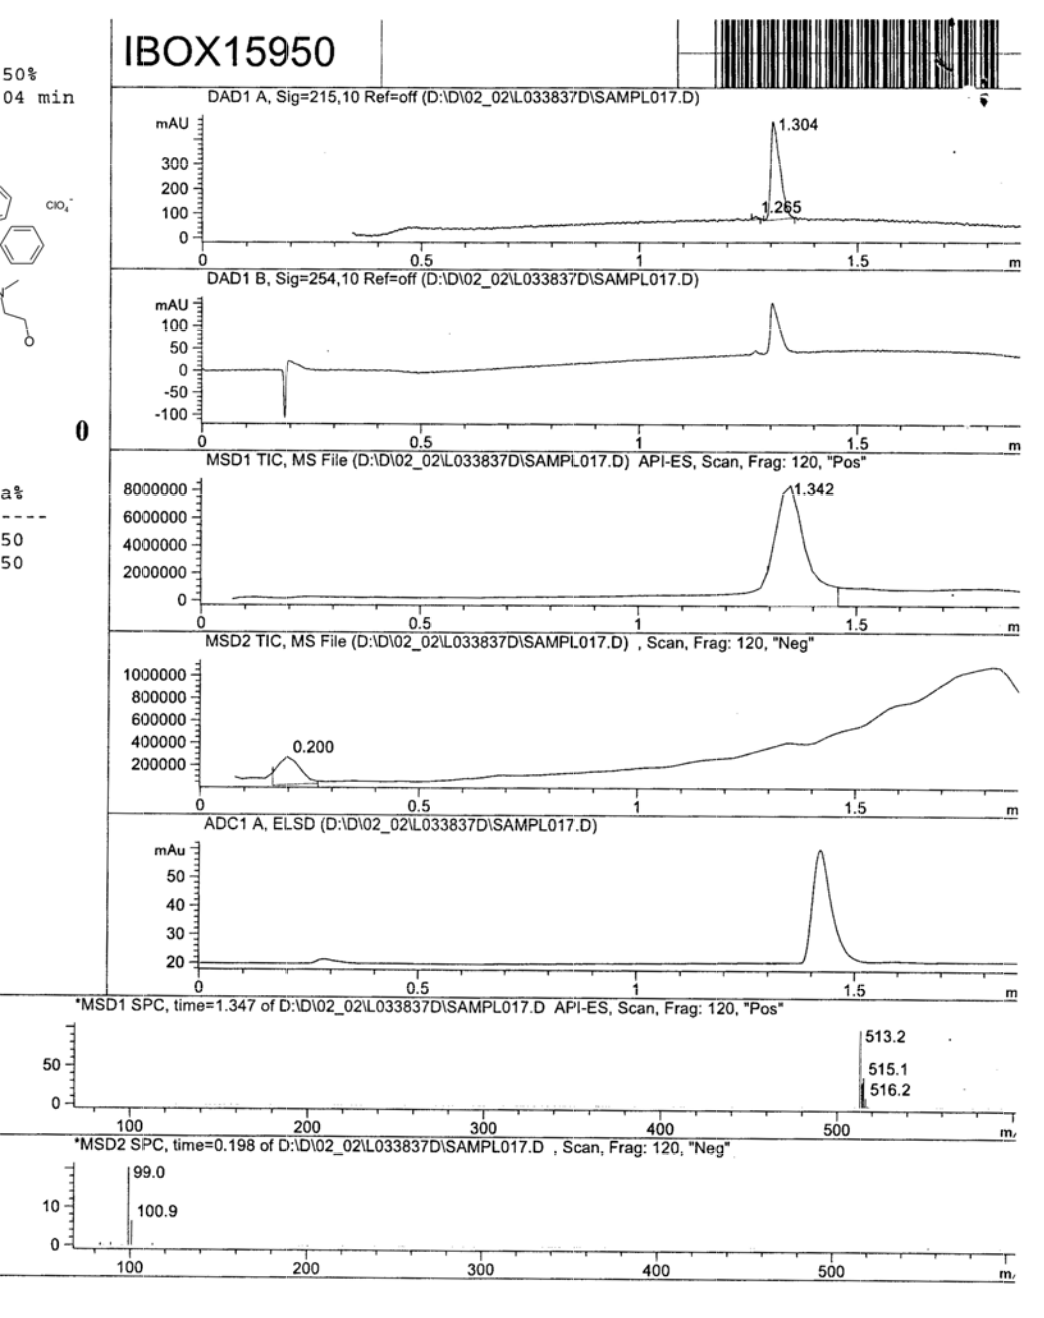


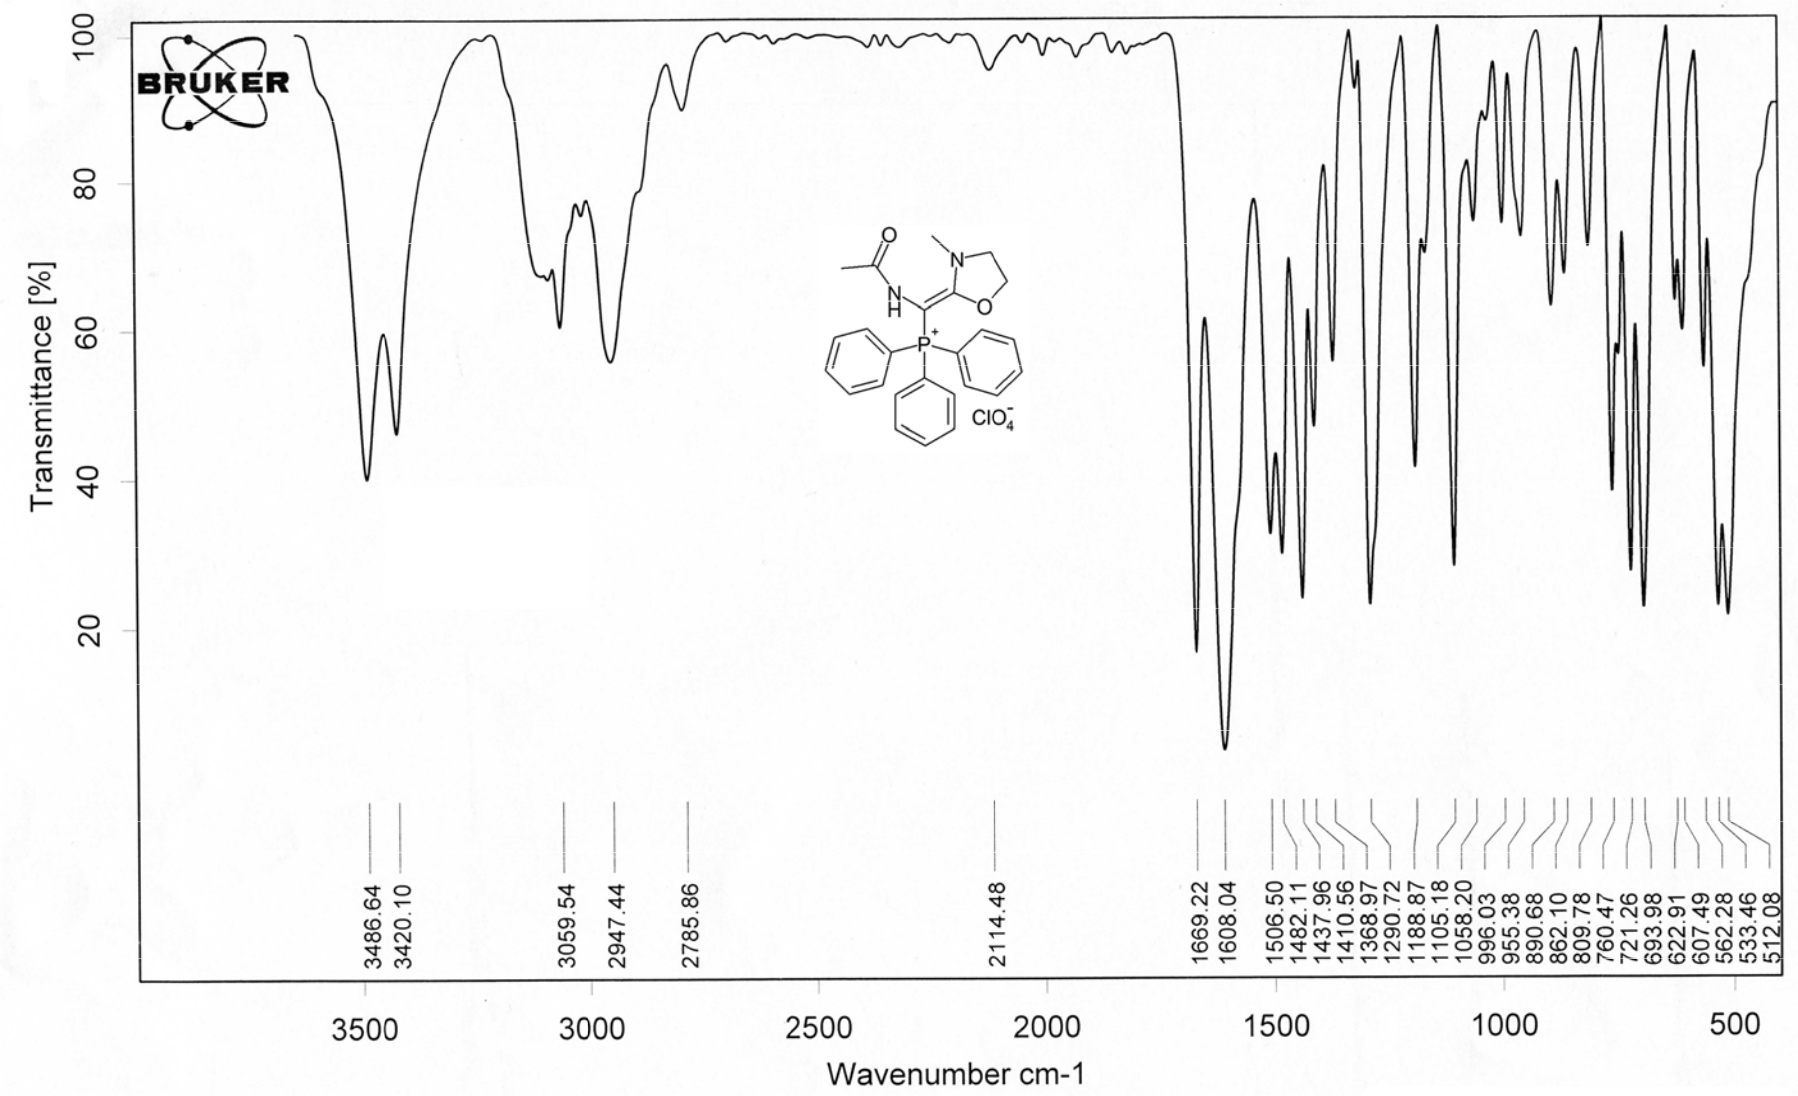


**Figure S 36.** IR (KBr) spectrum of [Acetylamino-(3-methyl 1,3-oxazolidin-2-ylidene)methyl]triphenylphosphonium perchlorate (**5a**).


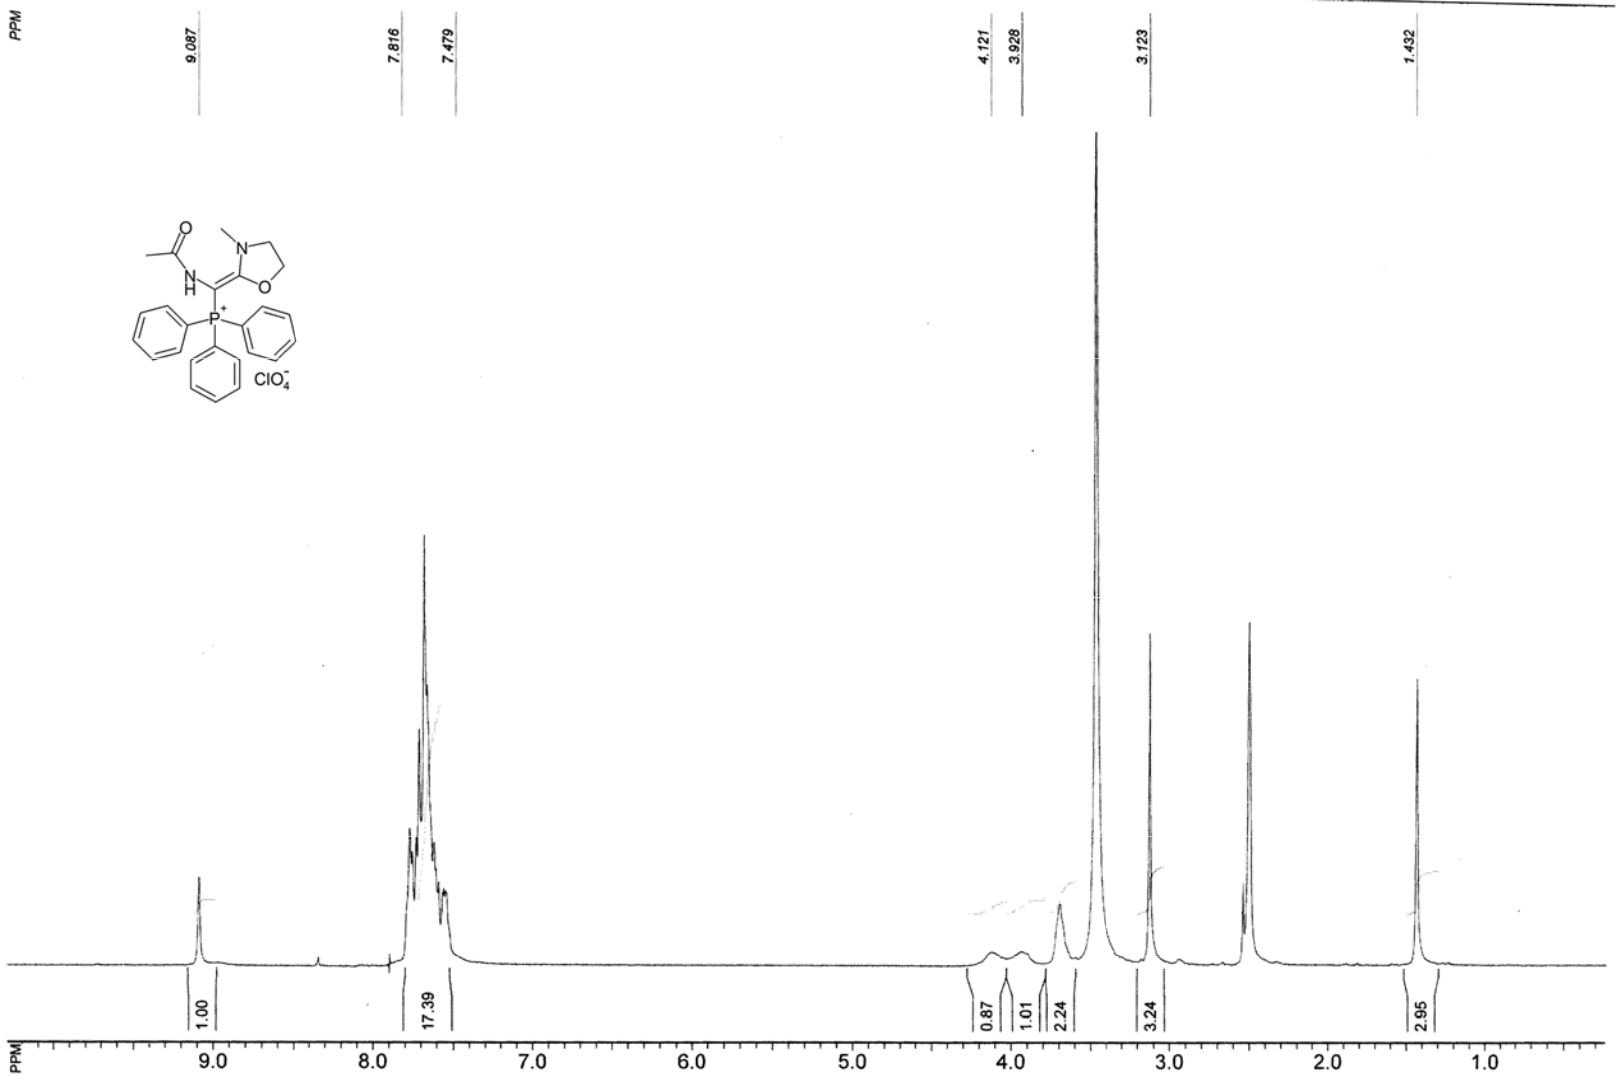


**Figure S 37.** 1H NMR spectrum of [Acetylamino-(3-methyl-1,3-oxazolidin-2-ylide e)methyl]triphenylphosphoniumperchlorate (**5a**).


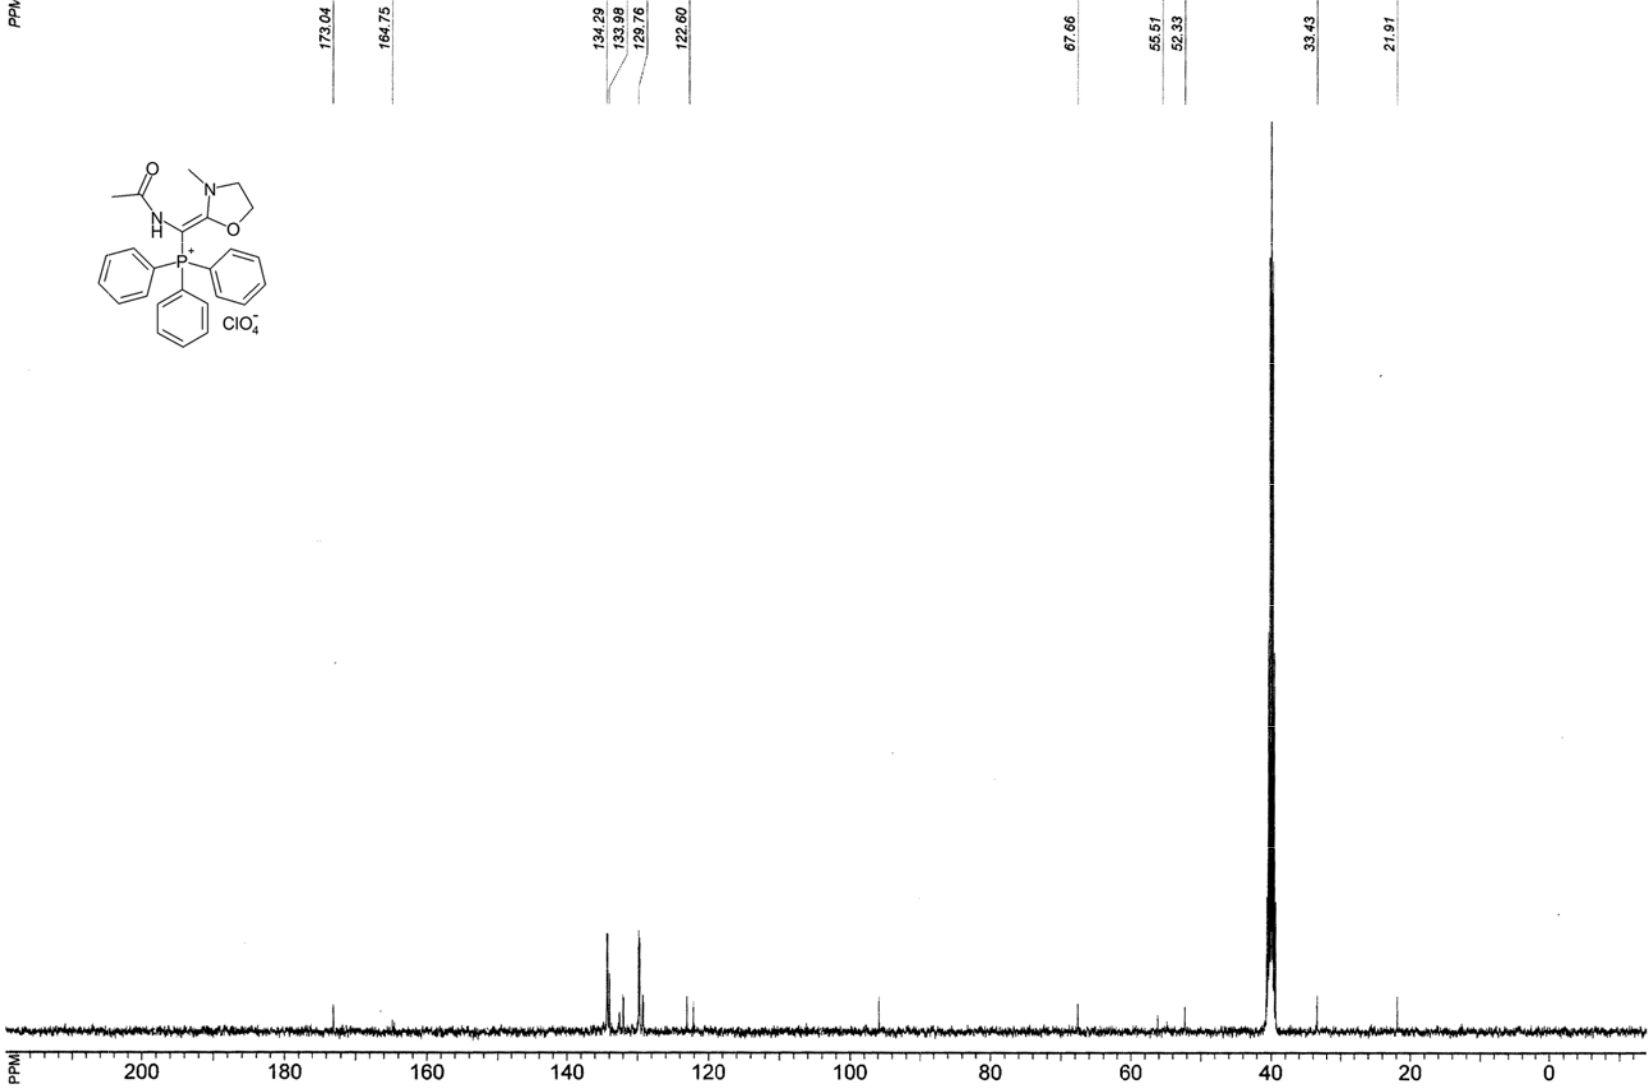


**Figure S 38.** 13C NMR spectrum of [Acetylamino-(3-methyl-1,3-oxazolidin-2-ylidene)methyl]triphenylphosphoniumperchlorate ( **a**).


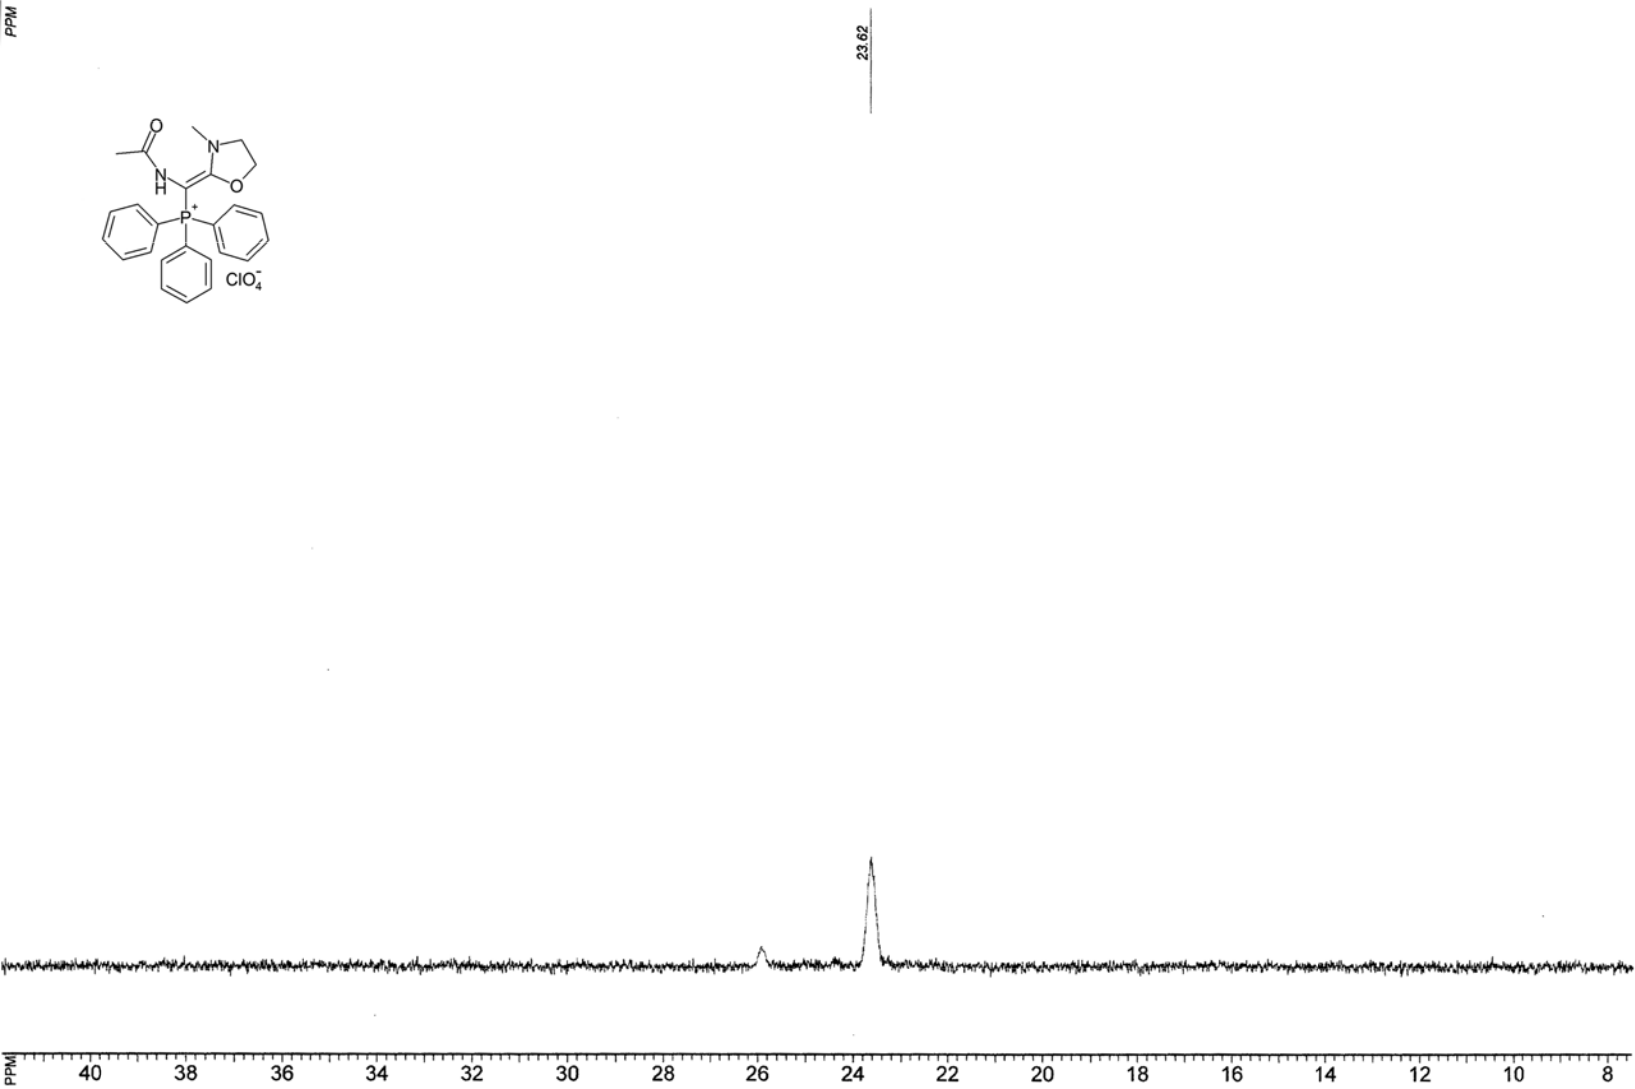


**Figure S 39.** 31P NMR spectrum of Acetylamino-(3-methyl-1,3-oxazolidin-2-ylidene)methyl]triphenylphosphoniumperchlorate (**5 a**).


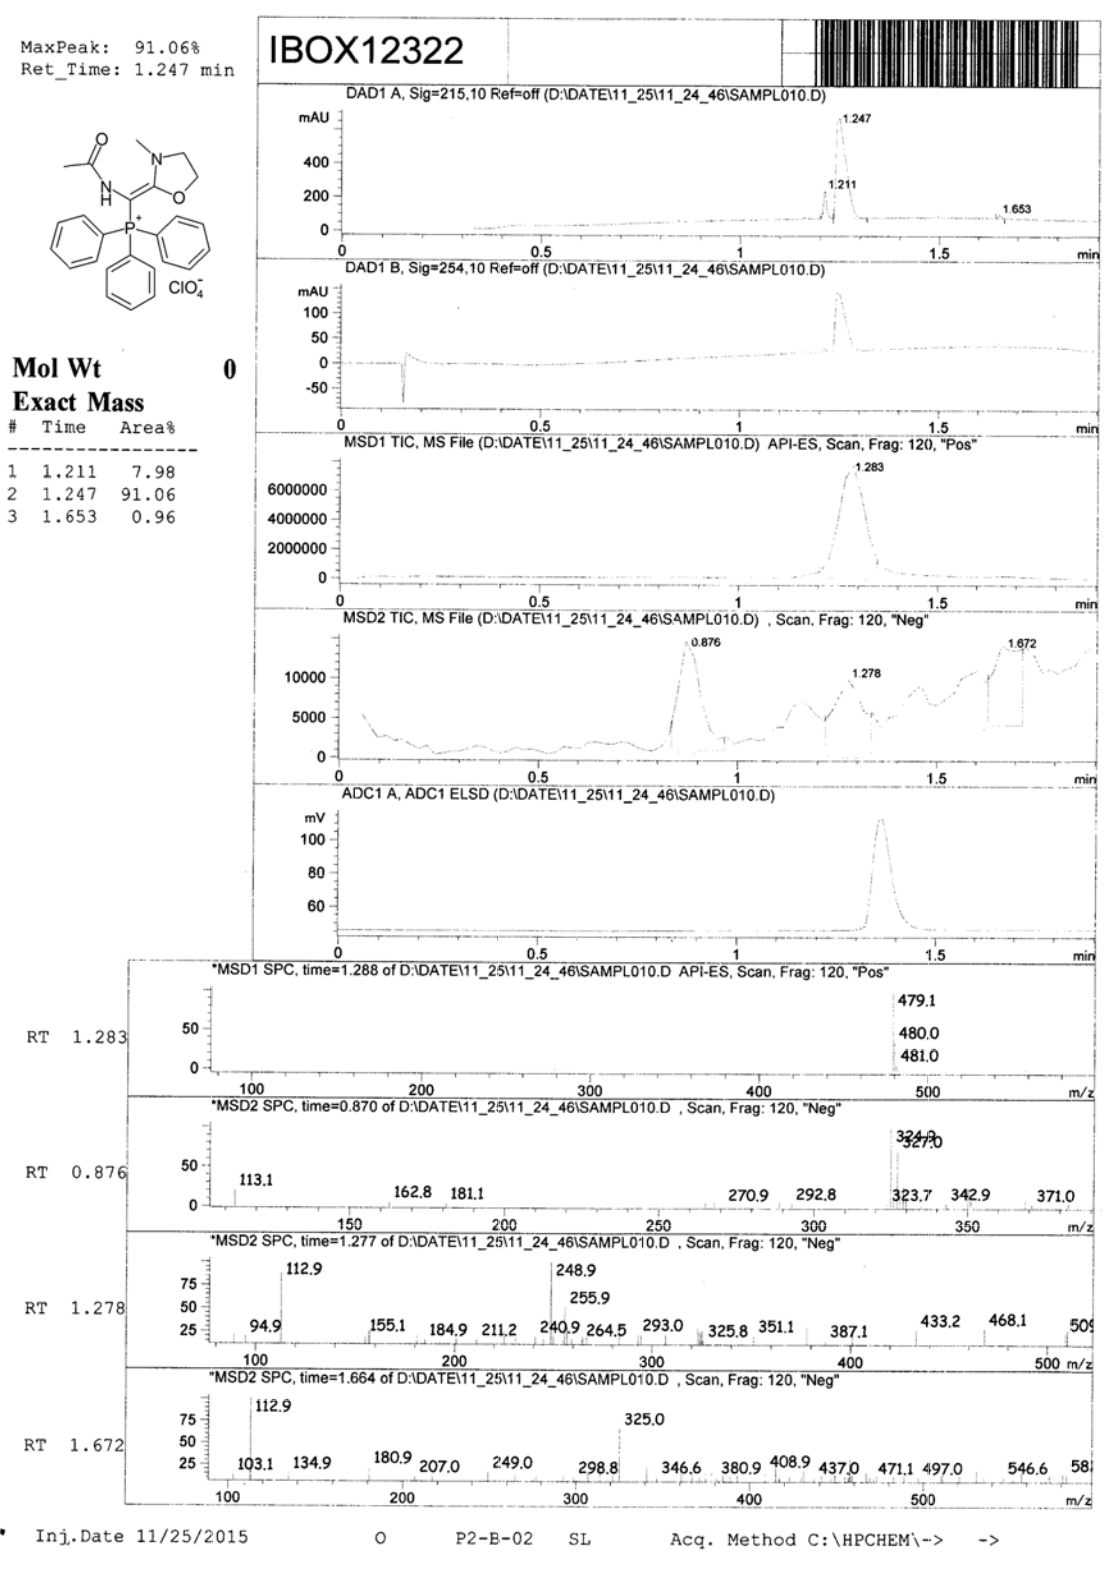


**Figure S 40.** LC-MS analysis report of [Acetylamino-(3-methyl-1,3-oxazolidin-2-yl dene)meth yl]triphenyl phosphoni m perchlorate (**5a**).


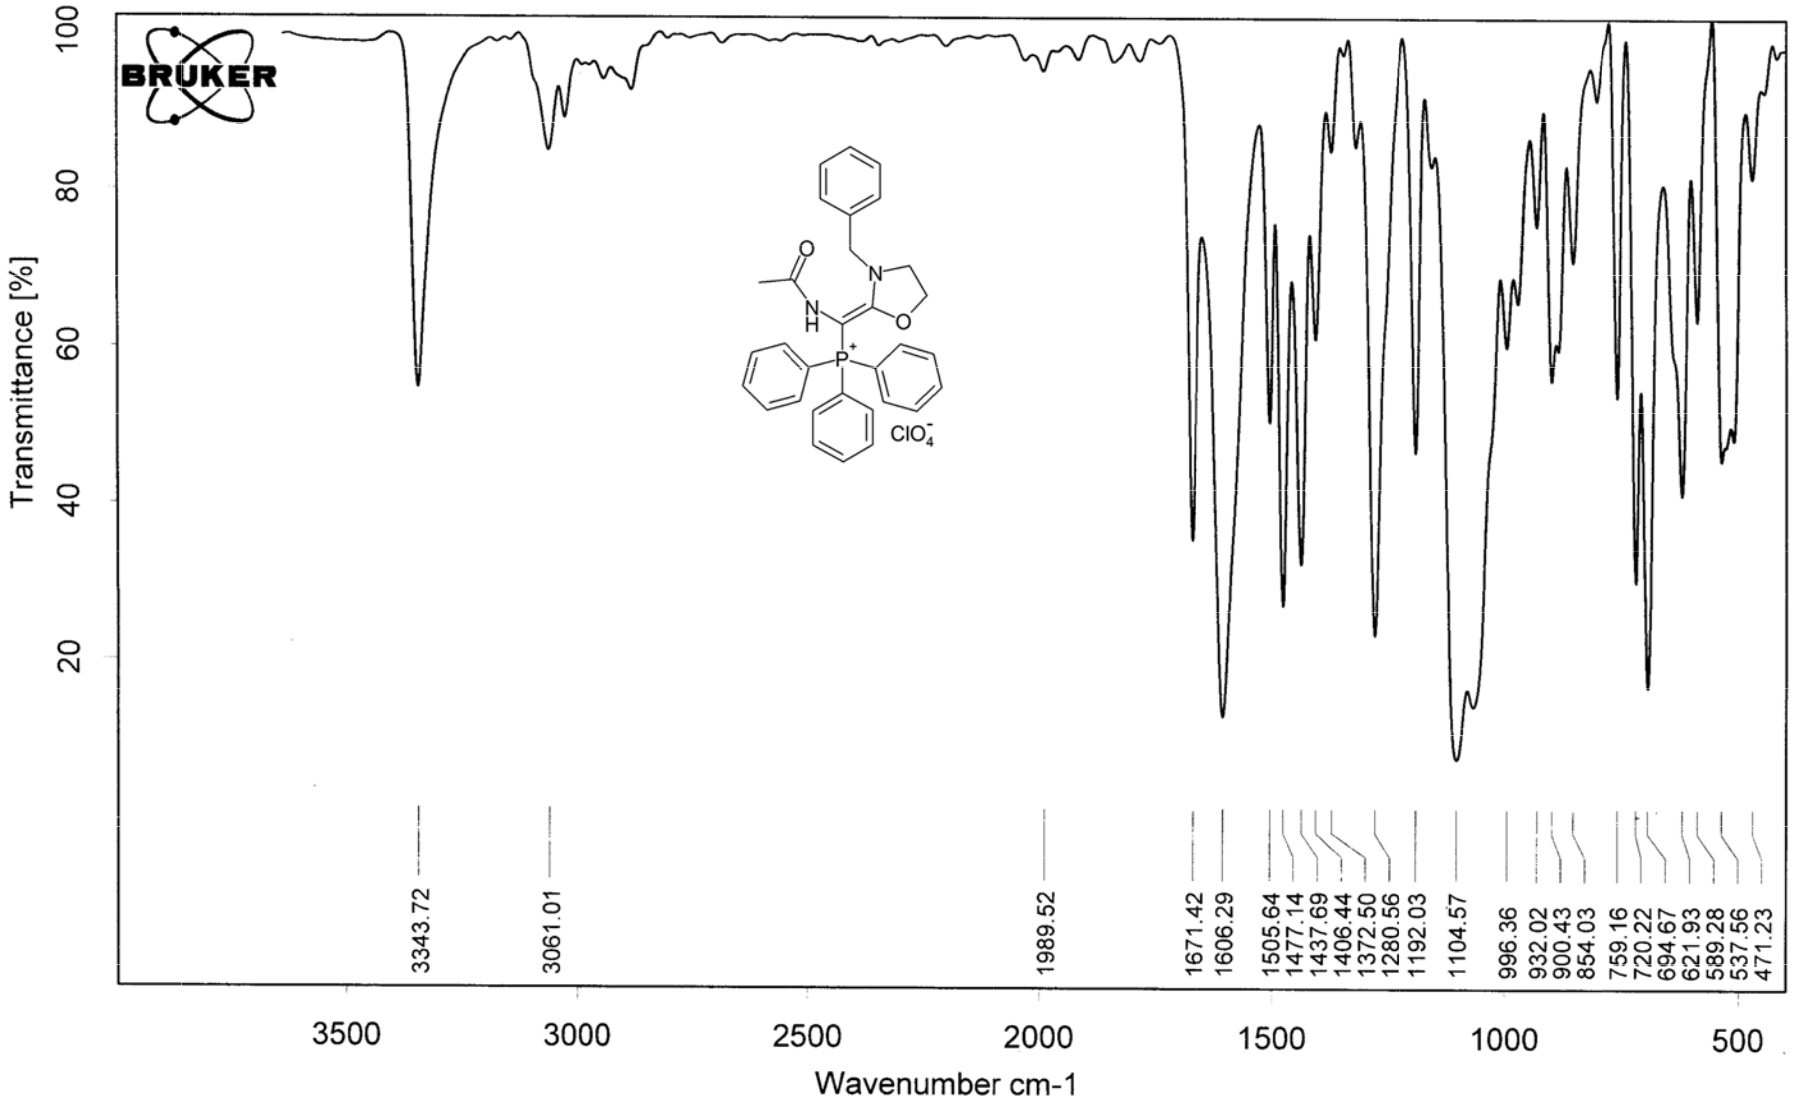


**Figure S 41.** IR (KBr) spectrum of [Acetylamino-(3-benzyl-1,3-oxazolidin-2-ylidene)methyl]triphenylphosphonium perchlorate (**5b**).


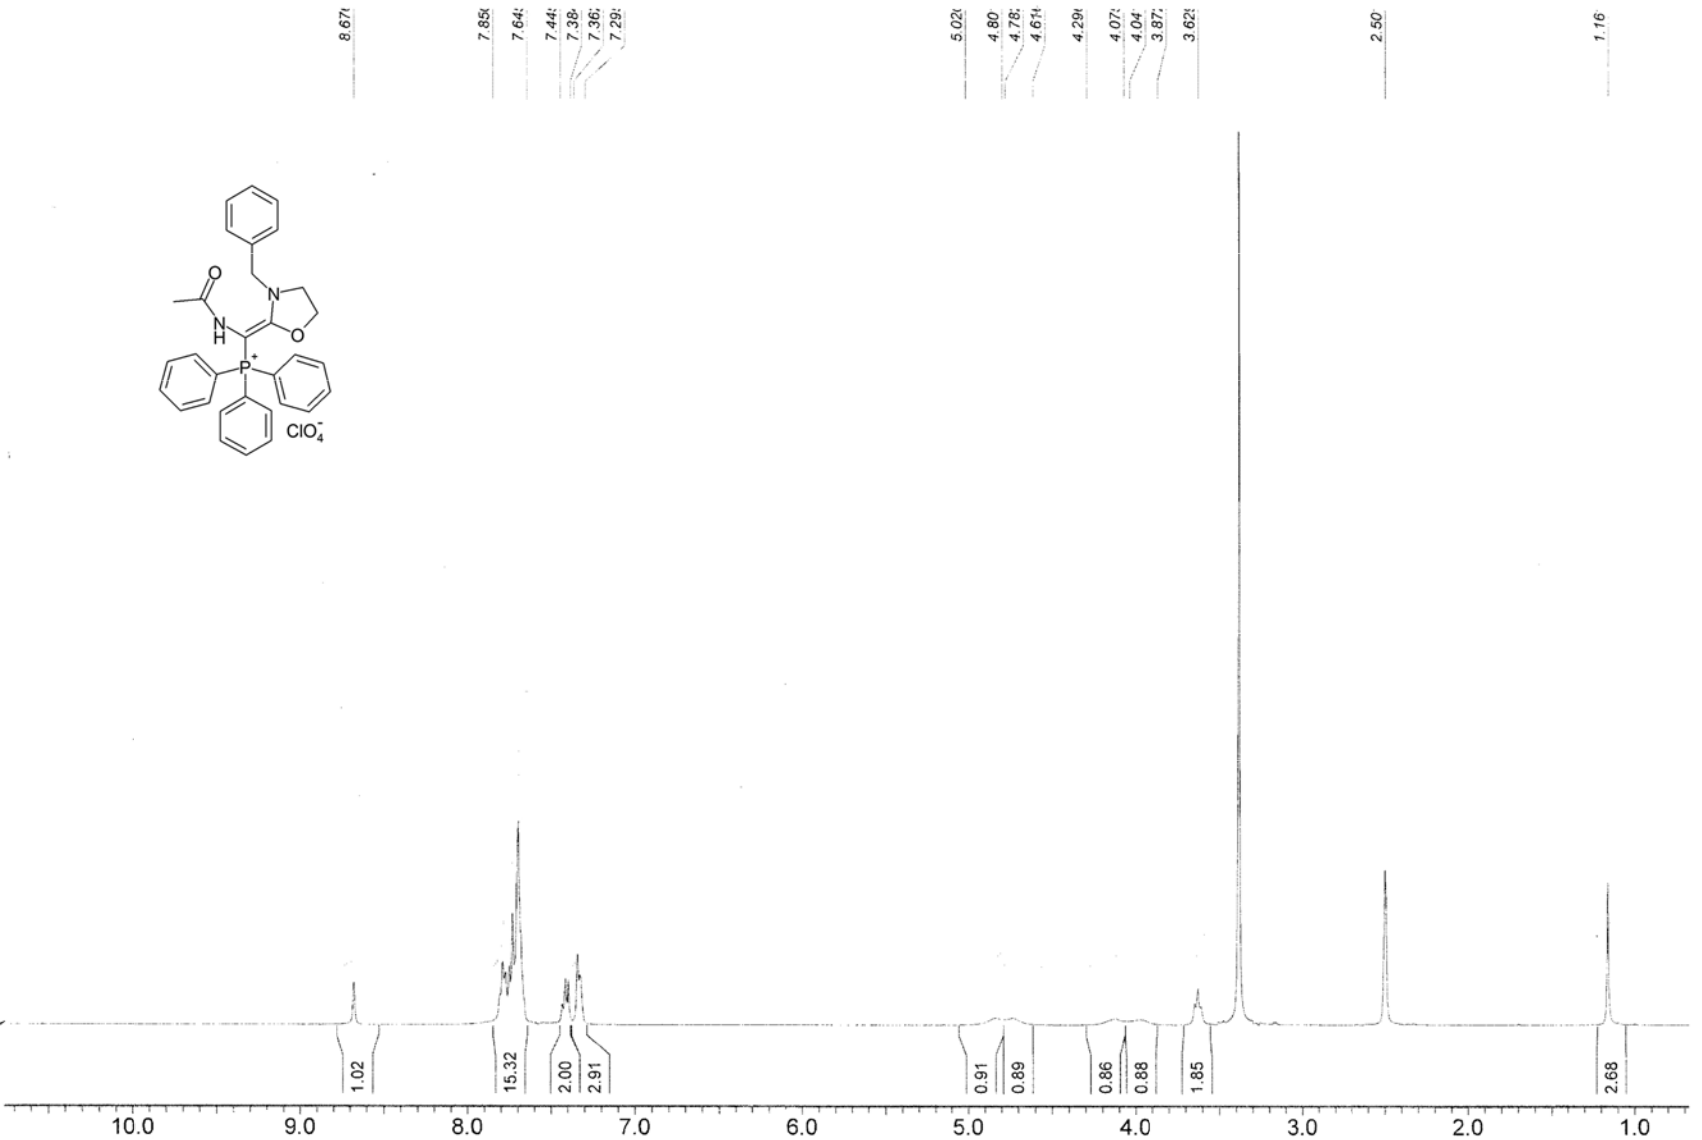


**Figure S 42.** 1H NMR spectrum of [Acetylamino-(3-benzyl-1,3-oxazolidin- -ylidene)methyl]triphenylphosphonium perchl rate (**5b**).


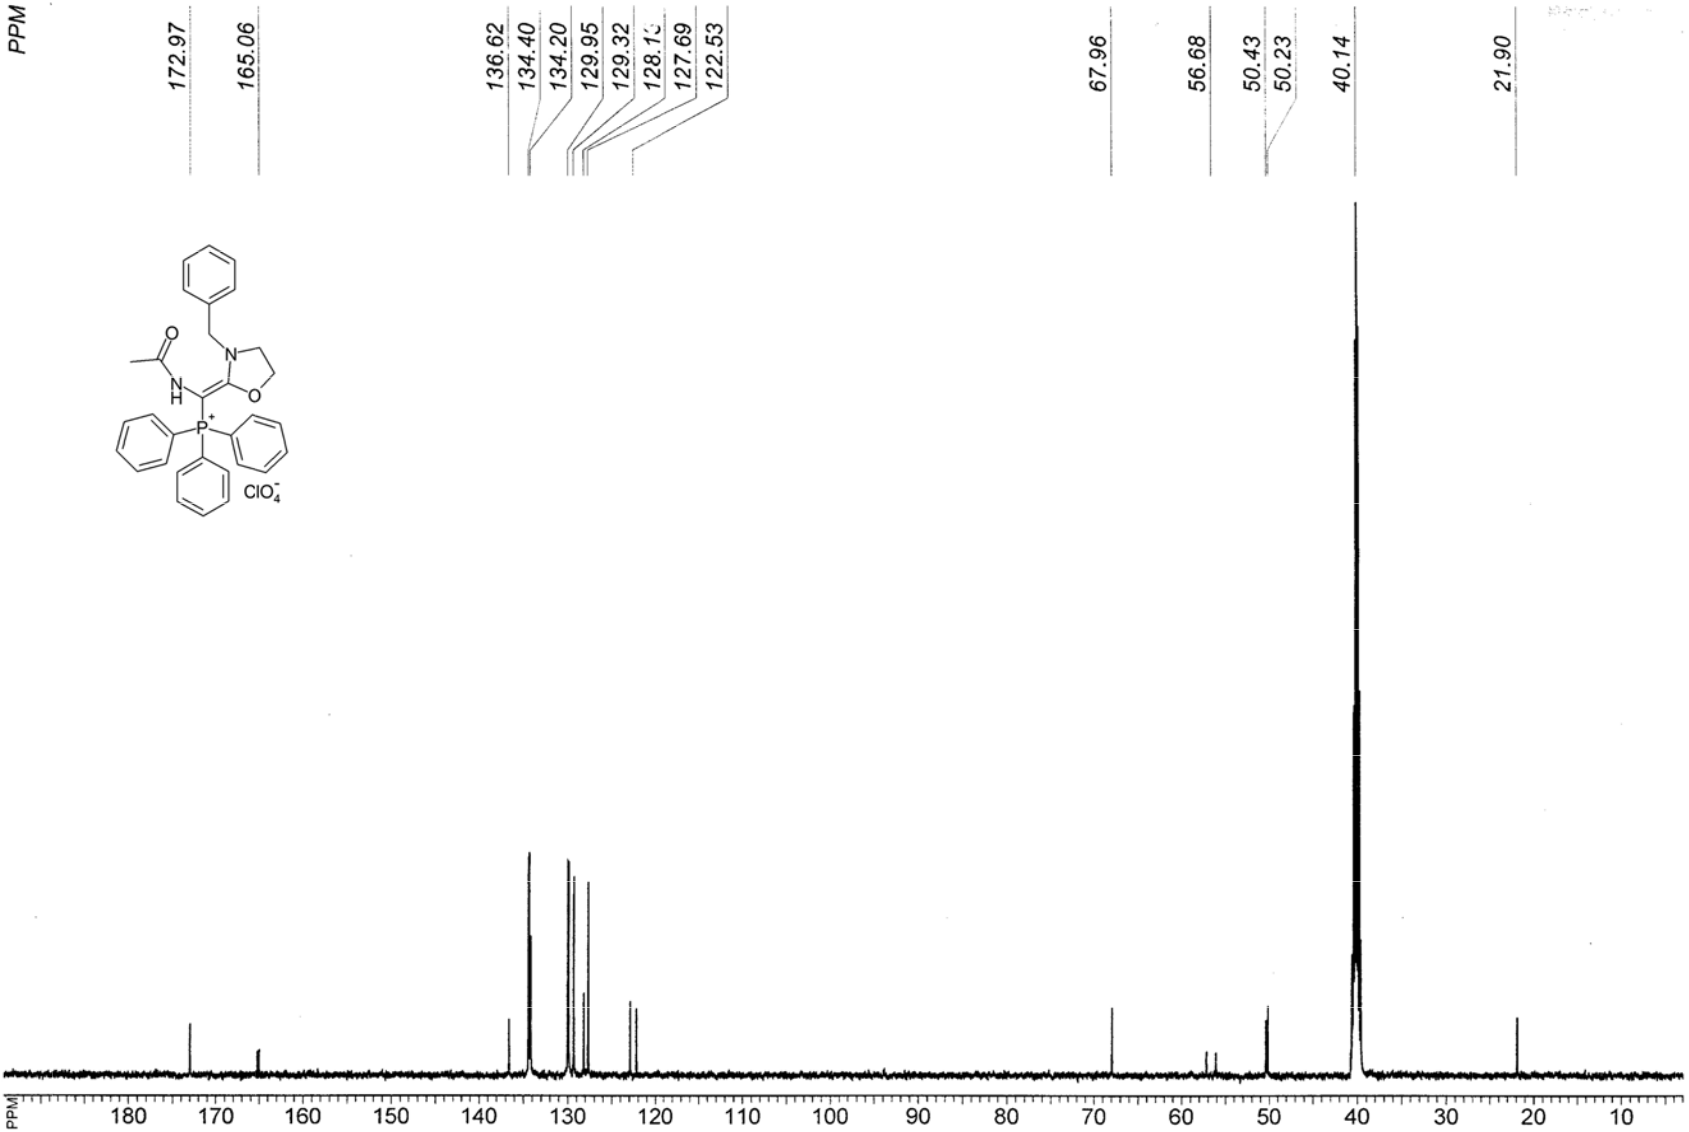


**Figure S 43.** 13C NMR spectrum of [Acetylamino-(3-benzyl-1,3-oxazolidin-2-ylidene)methyl]triphenylphosphoniumperchlorate (**5 b**).


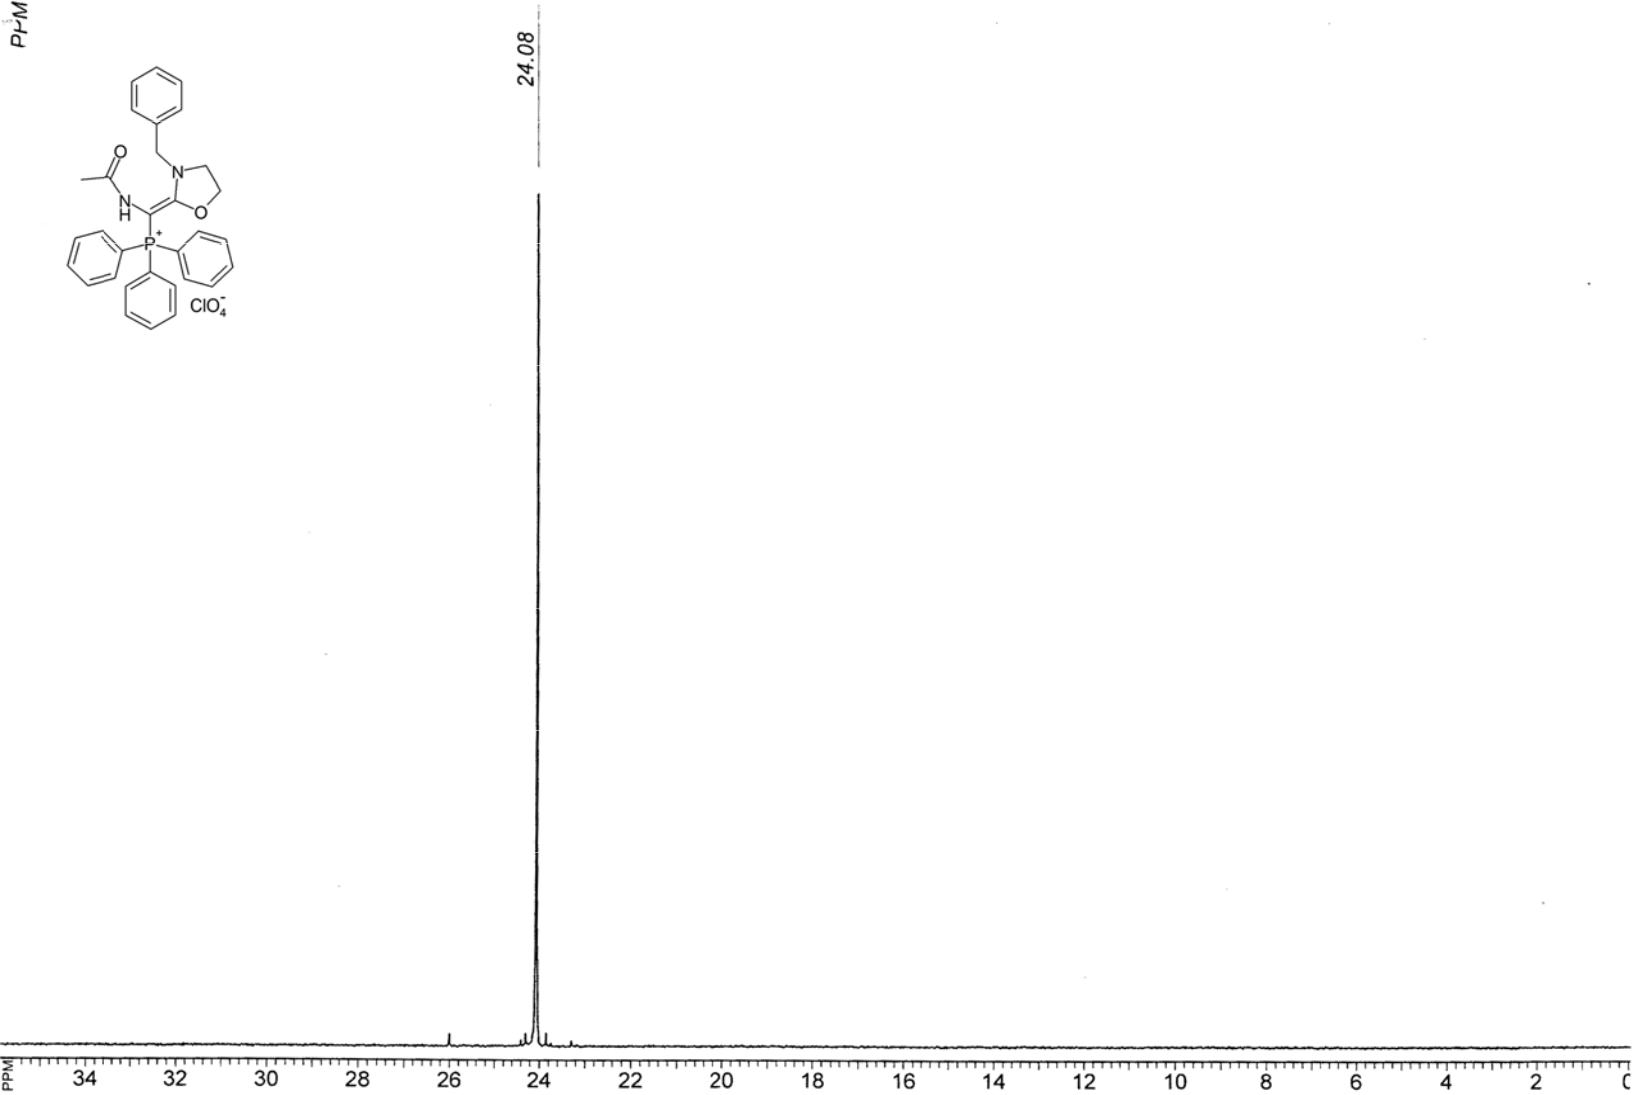


**Figure S 44.** 31P NMR spectrum of Acetylamino-(3-benzyl-1,3-oxazolidin-2-ylide e)methyl]triphenylphosphoniumperchlorate (**5b**).


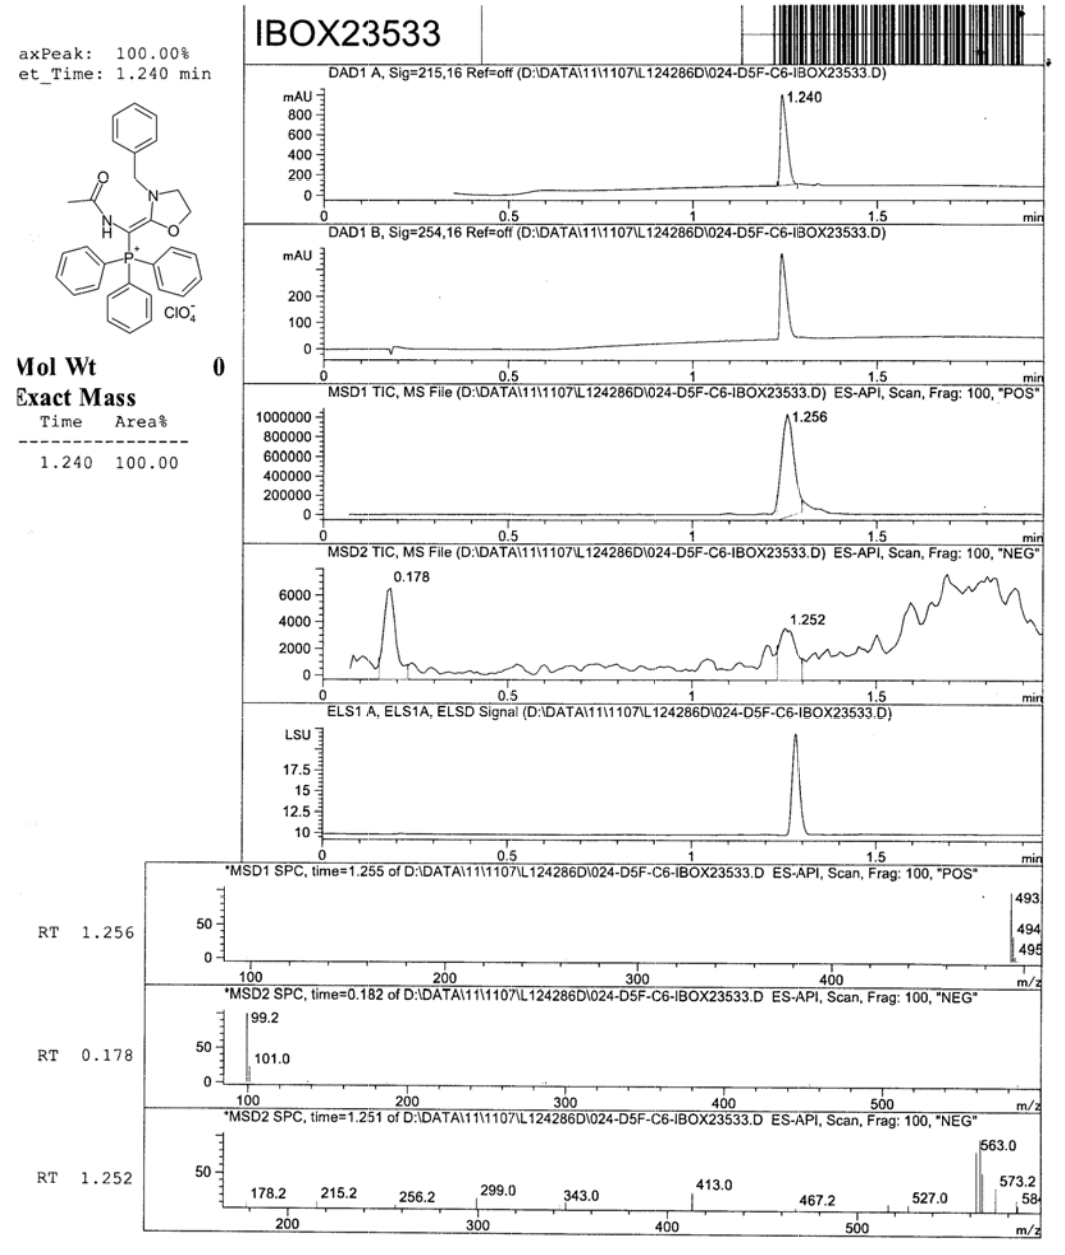


**Figur e S45.** LC-MS analysis report of [Acetylamino-(3-benzyl -1,3-oxazolidin-2-ylidene)methyl]triphenylphosphoniu perchlorate (**5b**).


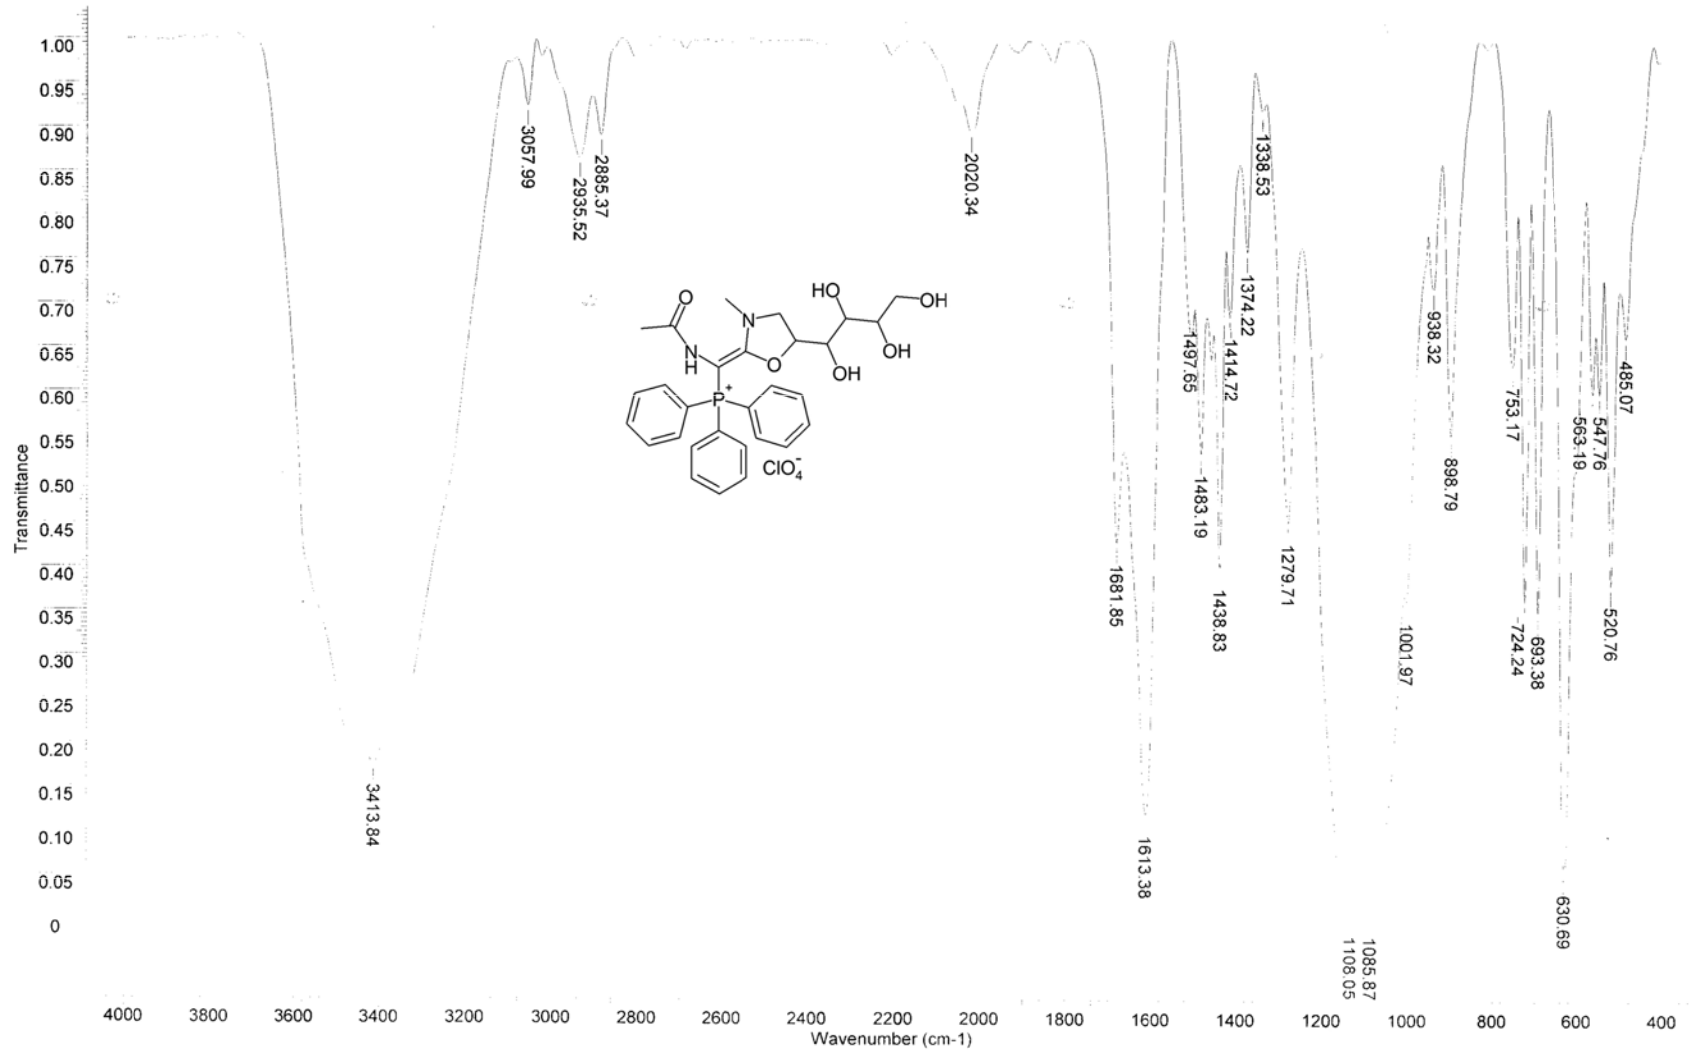


**Figure S 46.** IR (KBr) spectrum of {Acetylamino-[3-methyl-5-((1S,2R,3S)-1,2,3,4-tetrahydroxybutyl)-1,3-oxazolidin-2-ylidene]met hyl}triphenylph osphonium perchlorate (**5c**).


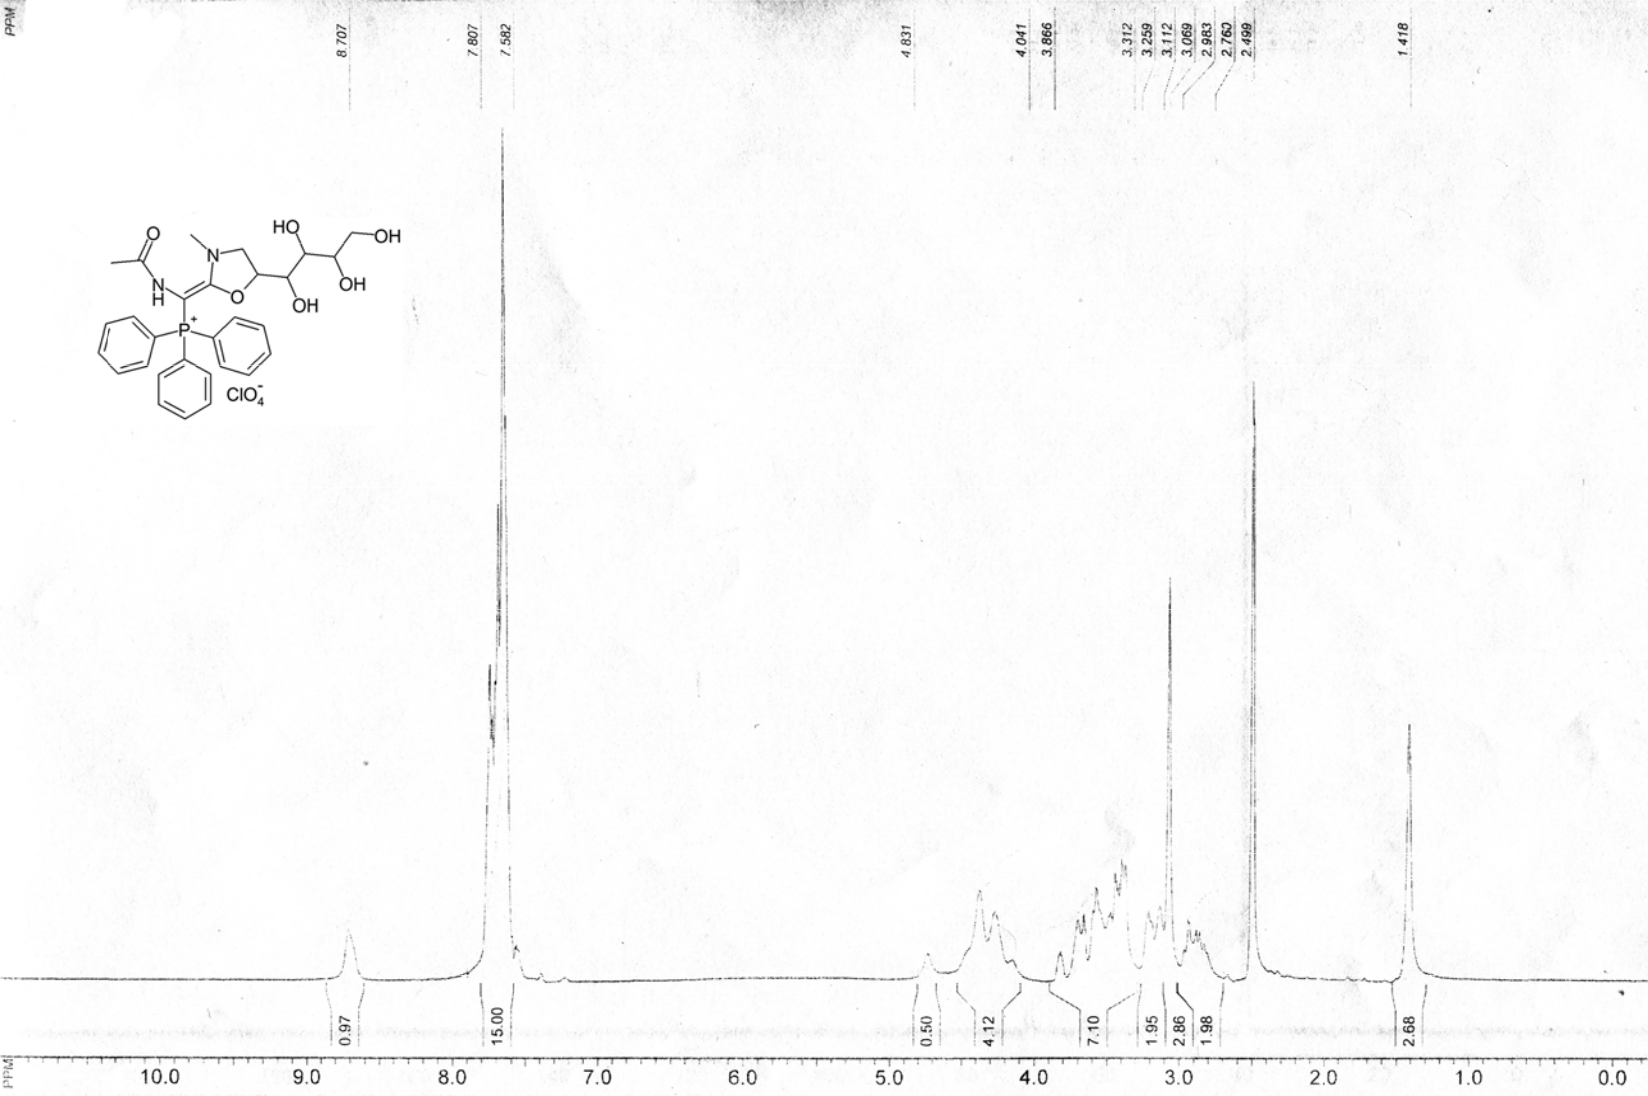


**Figure S 47.** 1H NMR spectrum of{Acetylamino-[3-methyl-5-((1S,2R,3S)-1,2,3,4-tetrahydroxybutyl)-1,3-oxazolidin-2-ylidene]methyl}triphenylphosphonium perchlorate (**5c**).


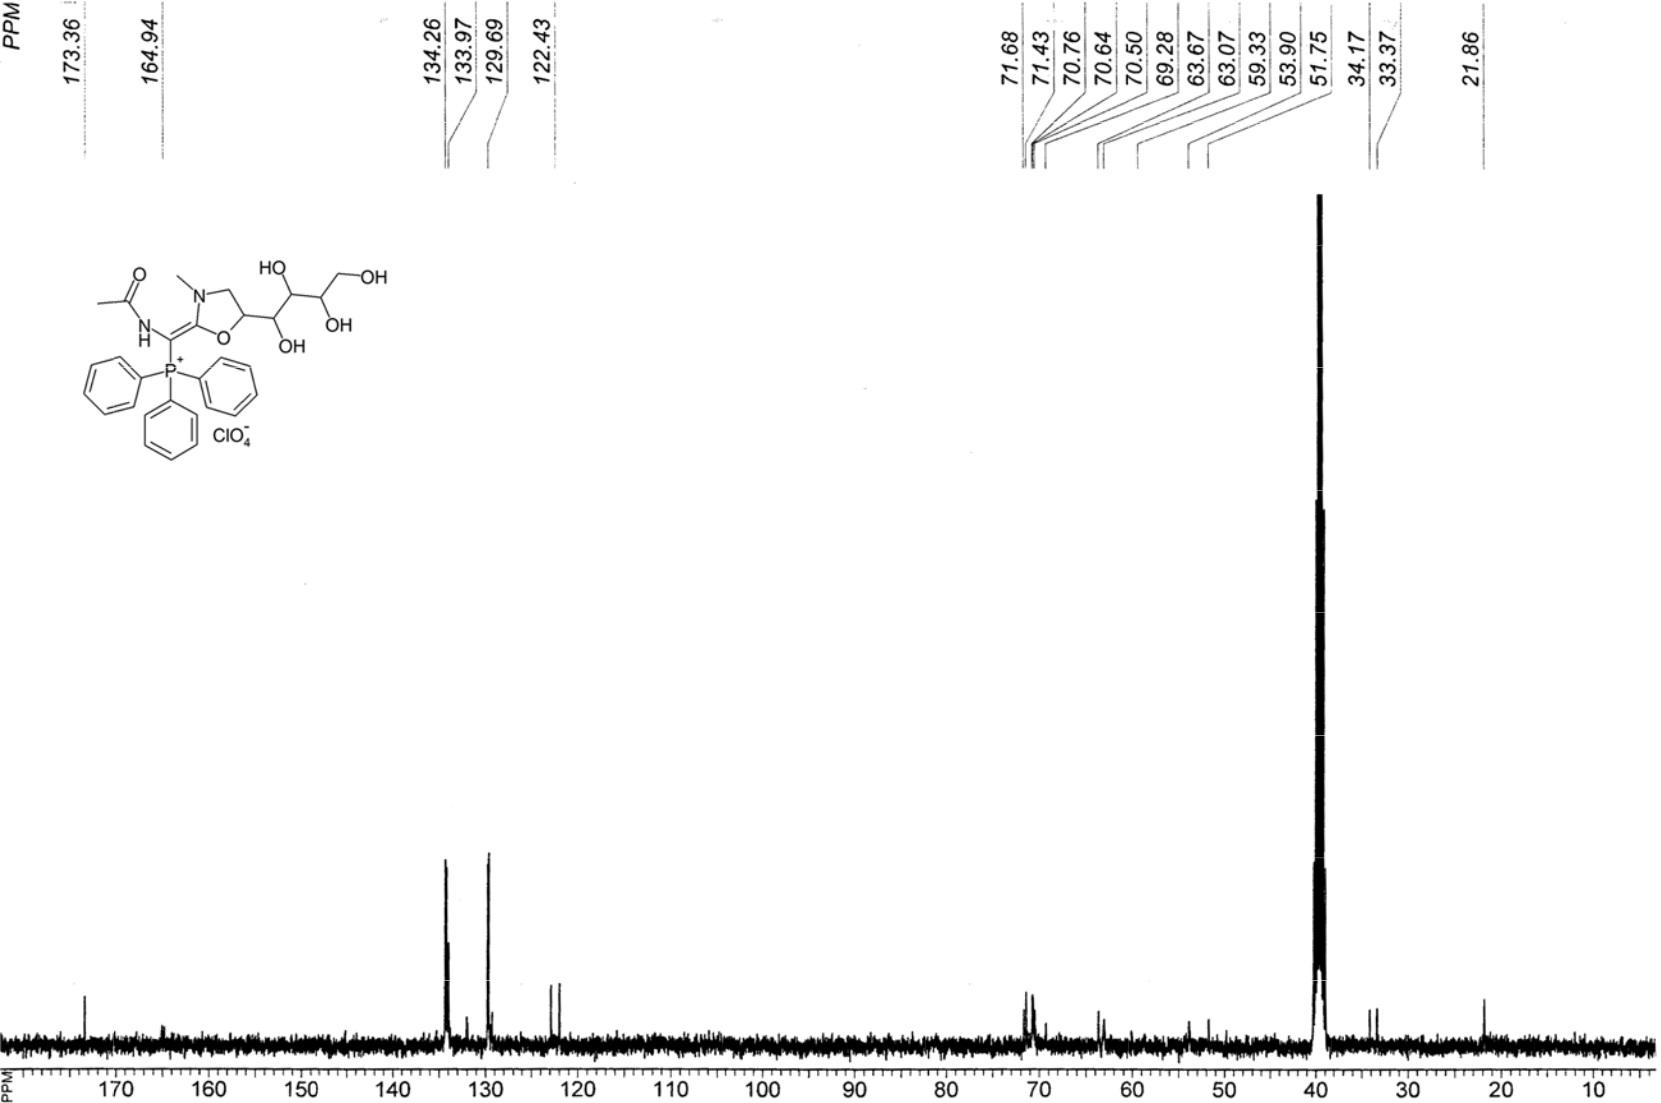


**Figure S 48.** 13C NMR spectrum of {Acetylamino-[3-methyl-5-((1S,2R,3S)-1,2,3,4-tetrahydroxybutyl)-1,3-oxazolidin-2-ylidene]methyl}triphenylphosphonium perchlorate (**5c**).


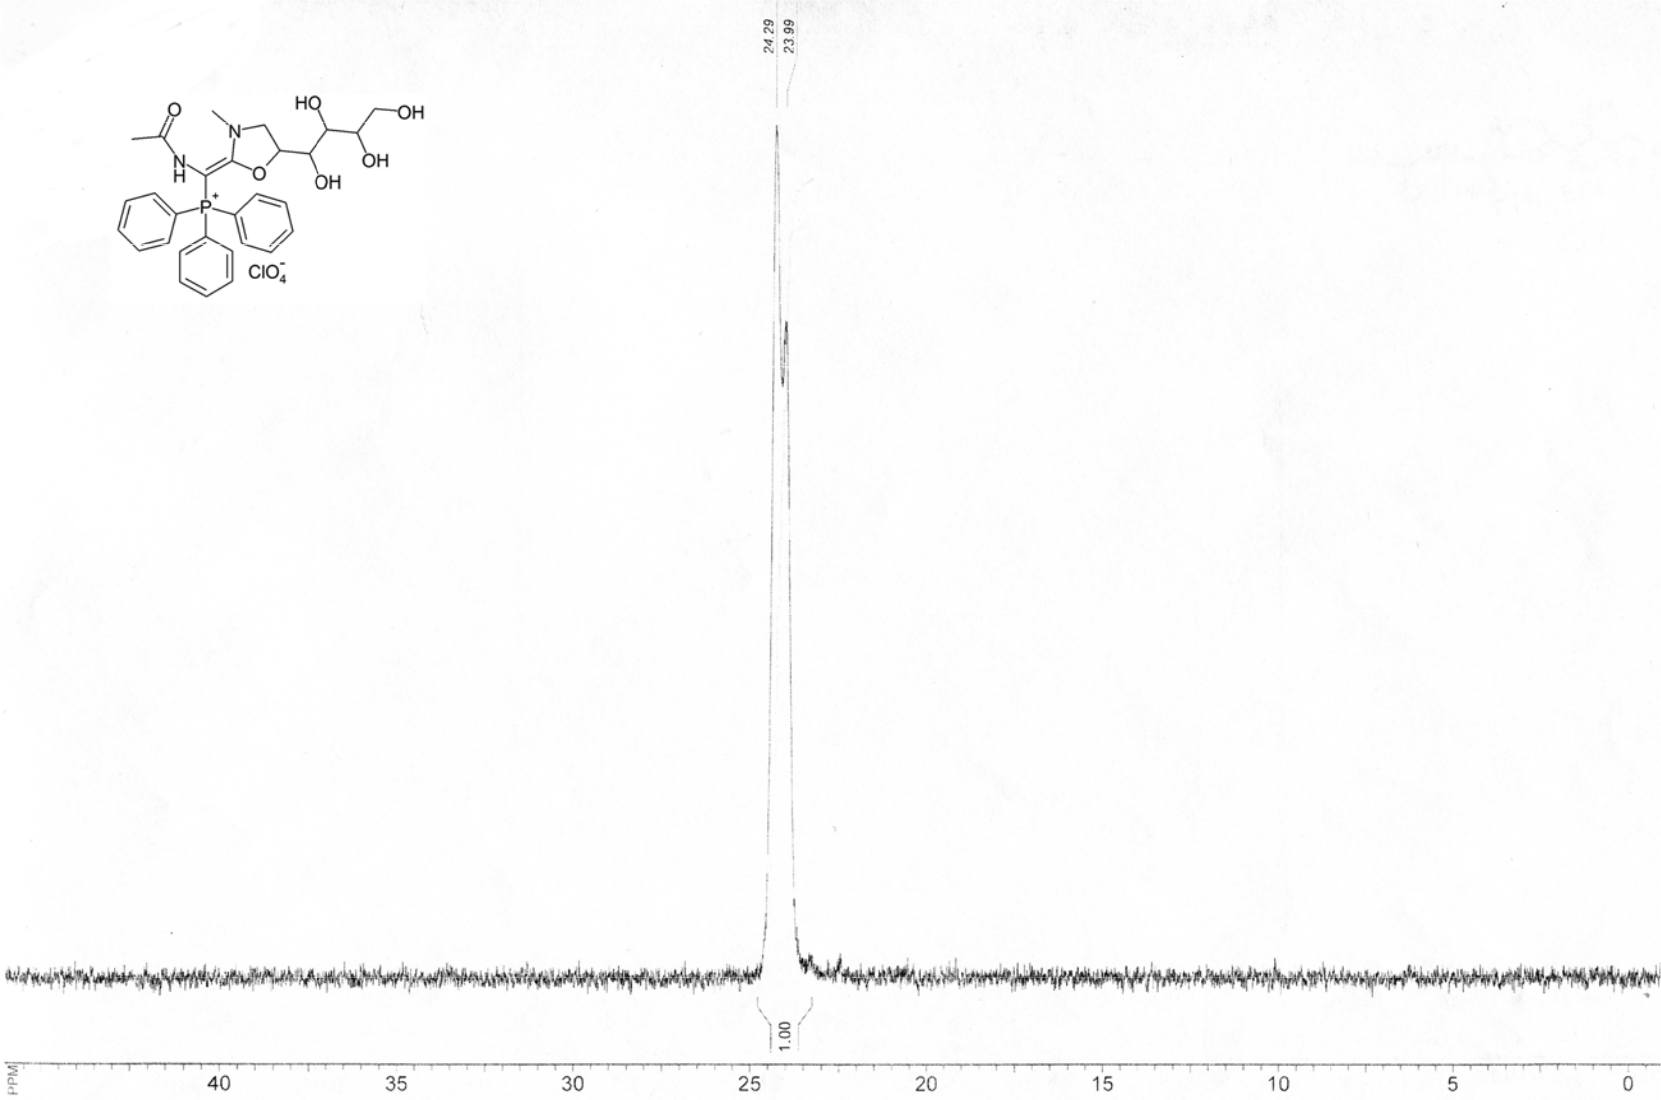


**Figure S 49.** 31P NMR spectrum of{Acetylamino-[3-methyl-5-((1S,2R,3S)-1,2,3,4-tetrahydroxybu yl)-1,3-oxazoli in-2-ylidene]methyl}triphenylphosphonium perchlorate (**5c**).


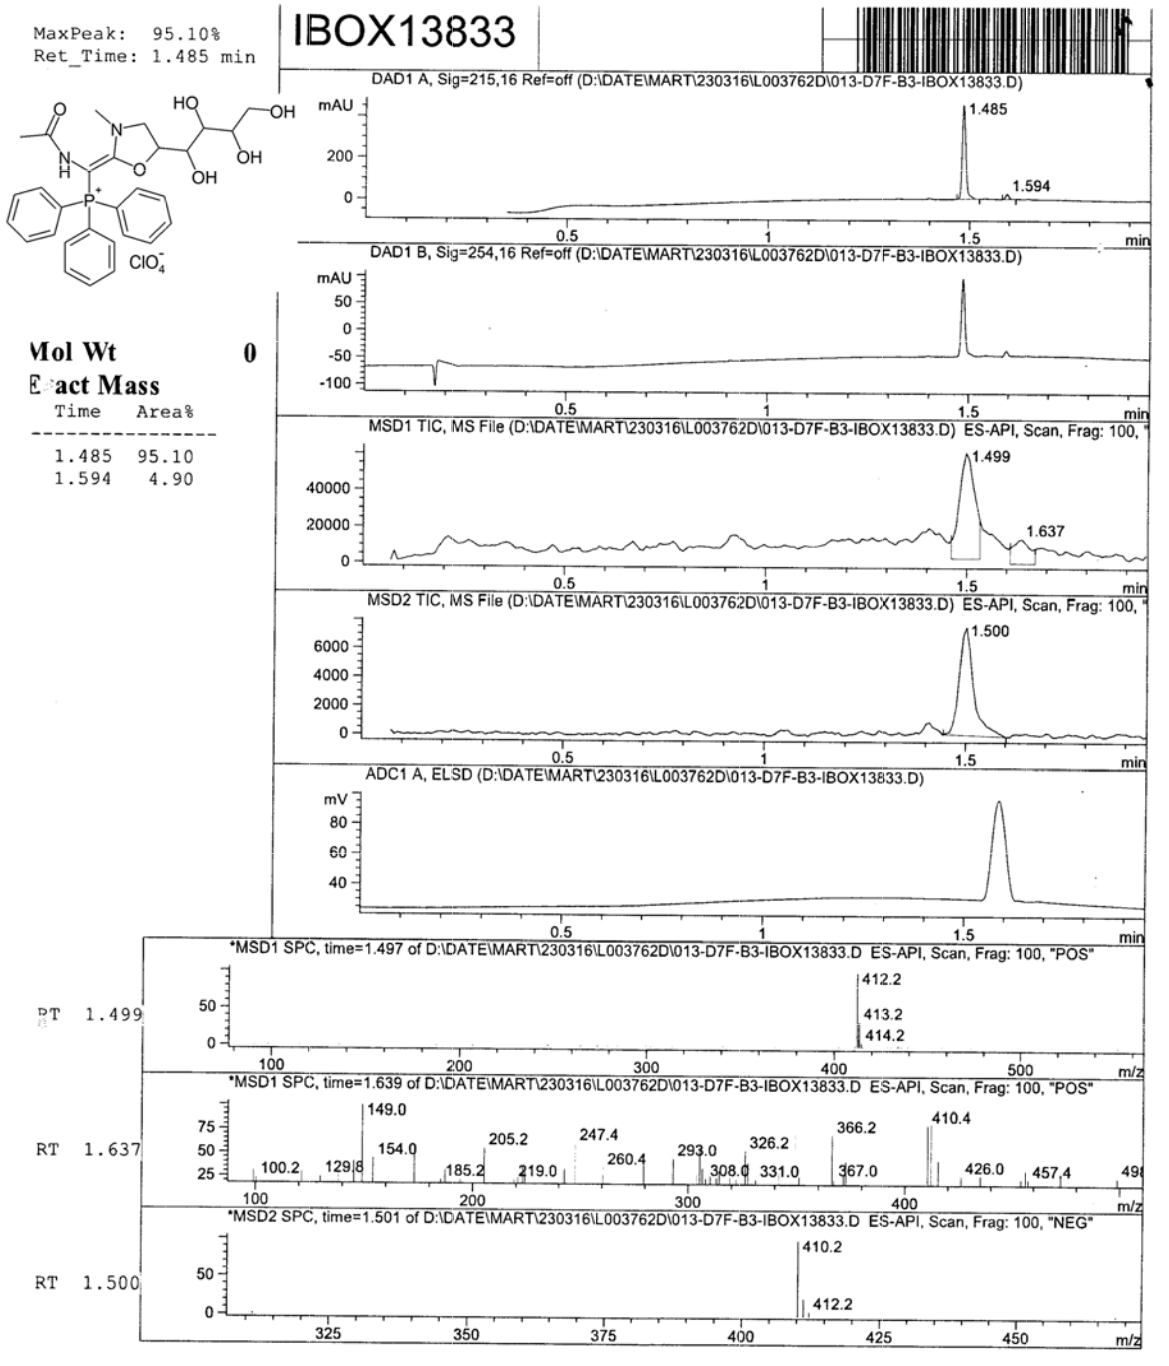


**Figure S 50.** LC-MS analy is report {Acetylamino-[3-methyl-5-((1S,2R,3S)-1,2,3,4-

tetrahydroxybutyl)-1,3-oxazolidin-2-ylidene]met hyl}triphenylphosphon ium perchlorate (**5c**).


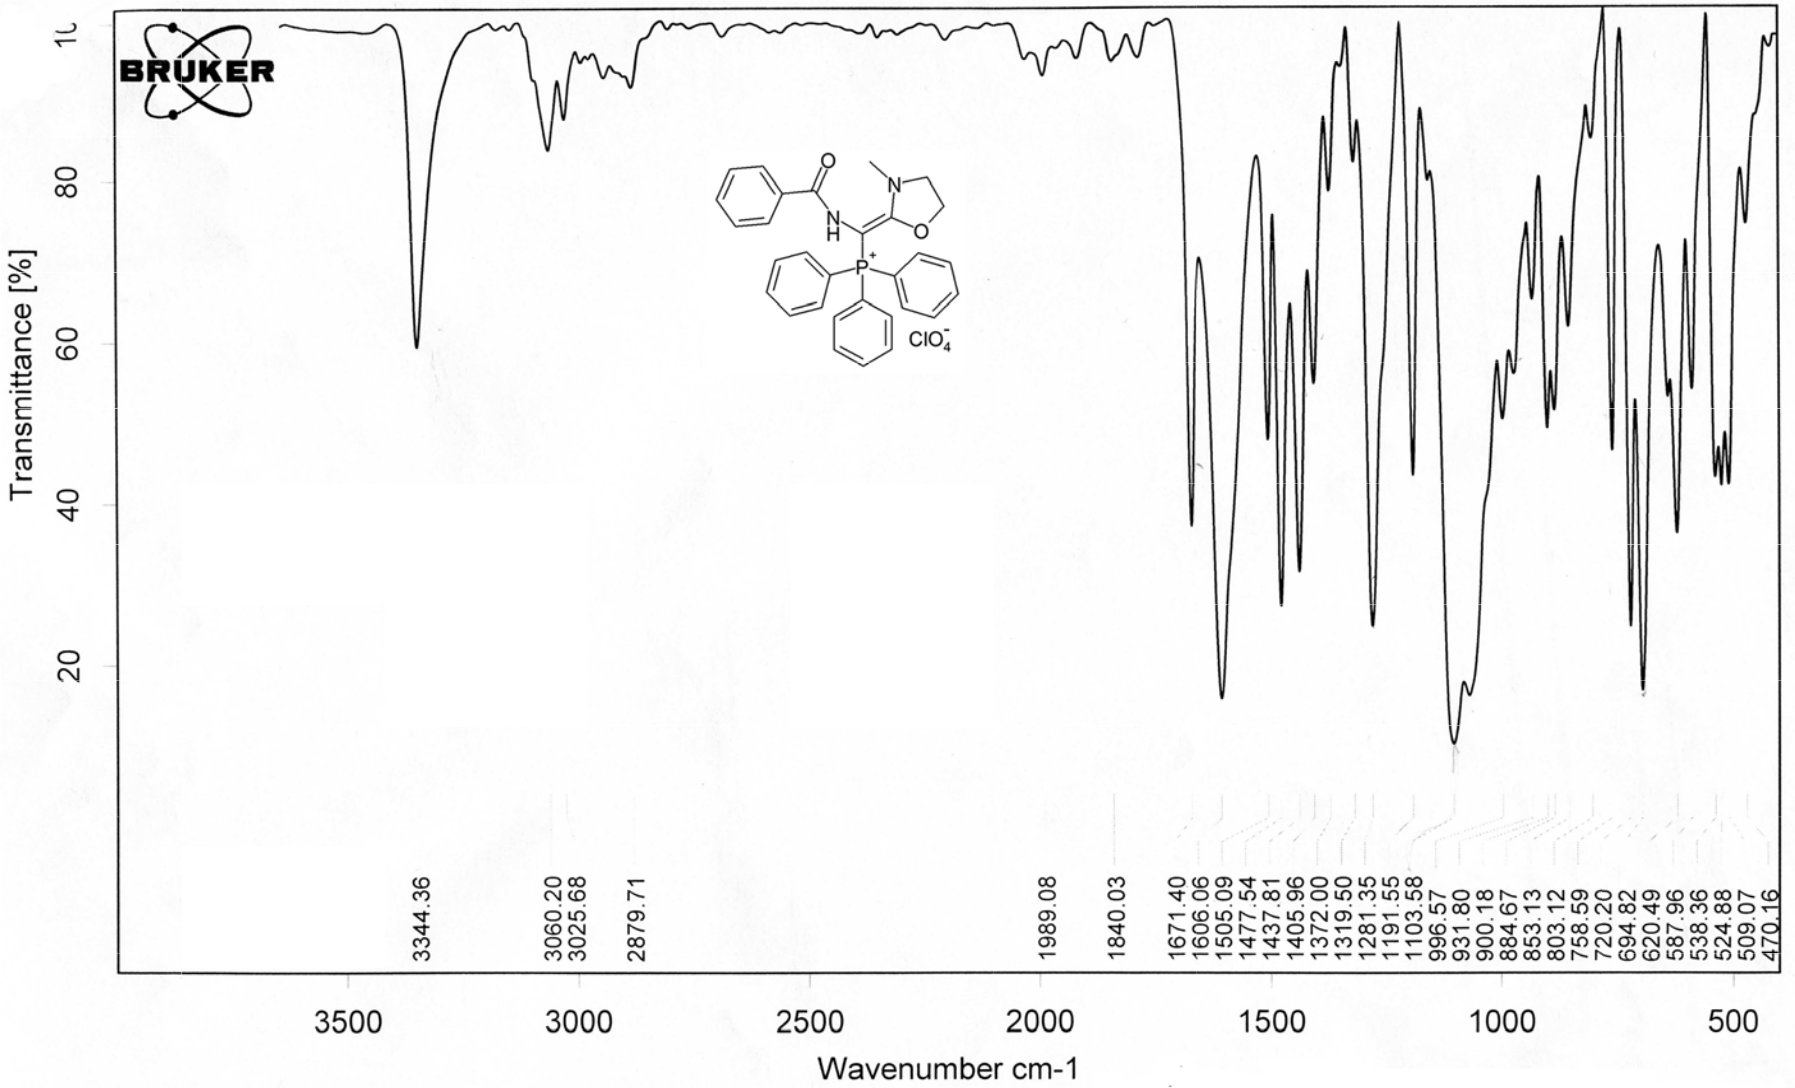


**Figure S 51.** IR (KBr) spectrum of [Benzoylamino-(3-meth l-1,3-oxazolidi -2-ylidene)methyl]triphenylph sphonium perchlorate (**5d**).


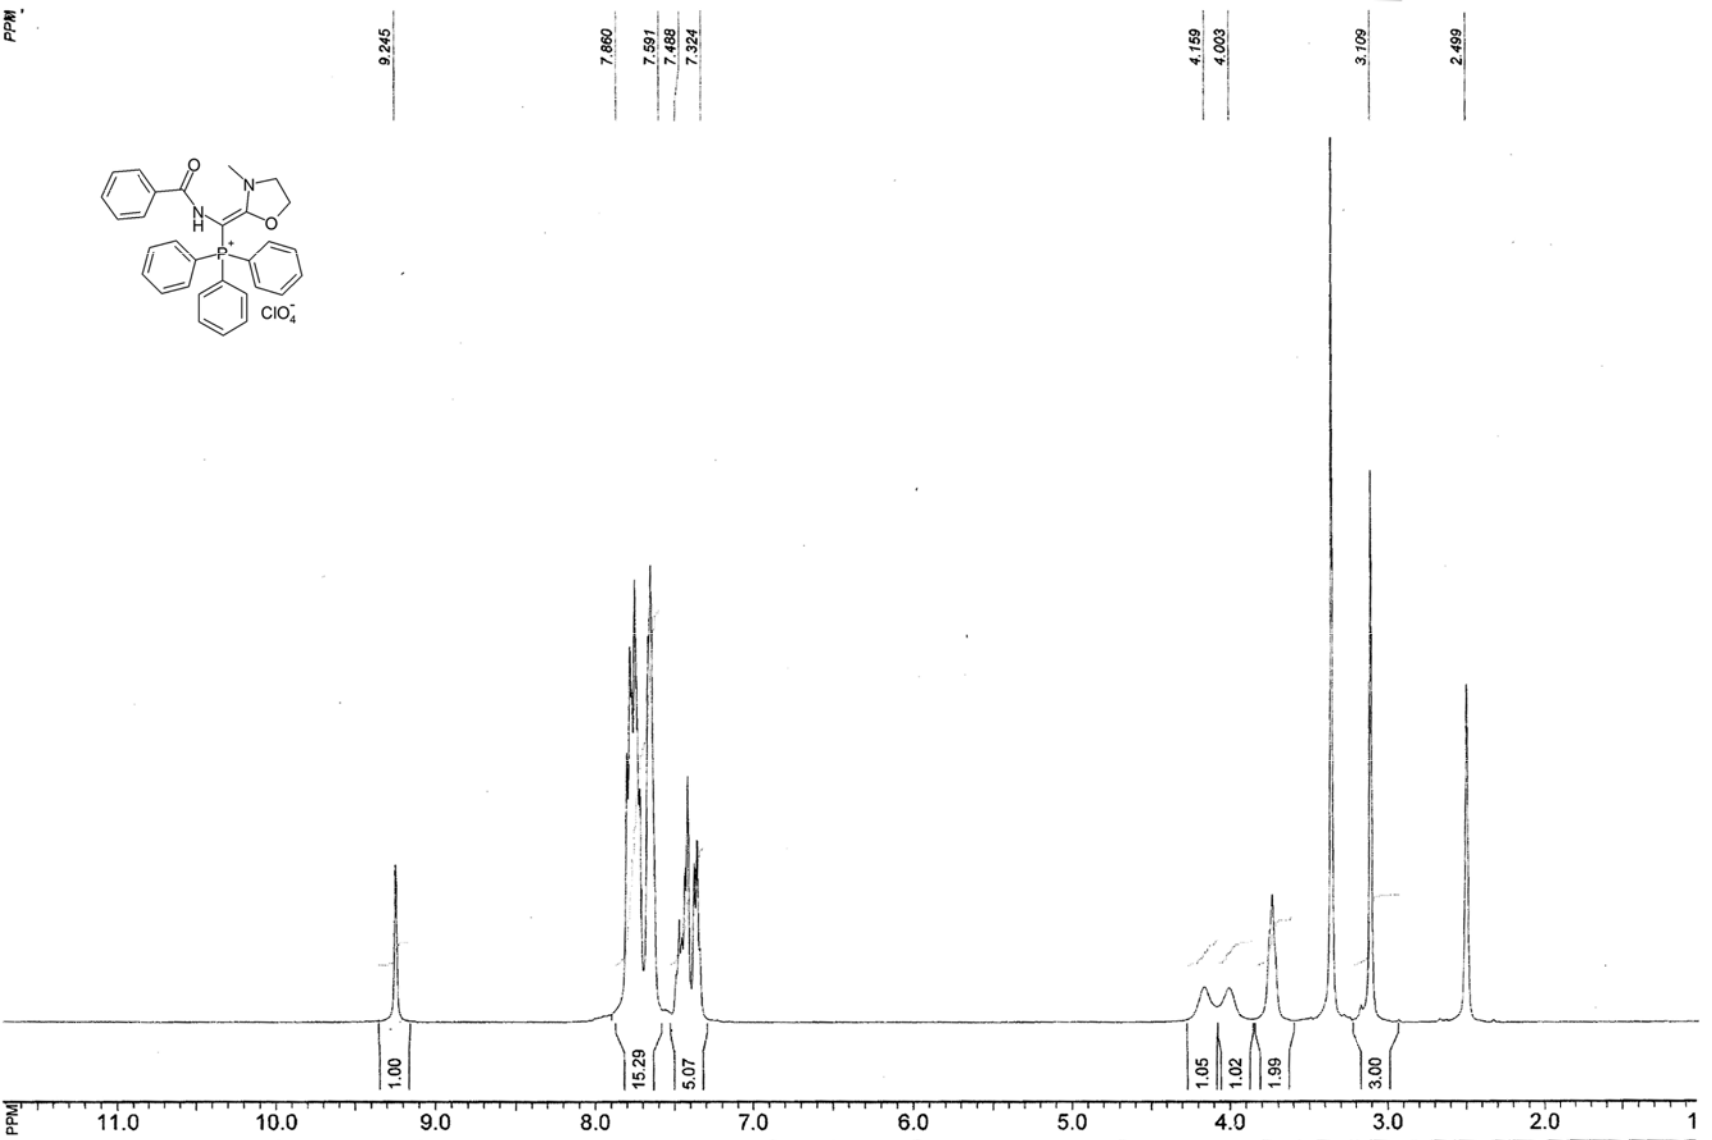


**Figure S 52.** 1H NMR spectrum of [Benzoylamino- 3-methyl-1,3-oxazolidin-2-ylidene)methyl]triphenylphosphonium perchlorate( **5d**).


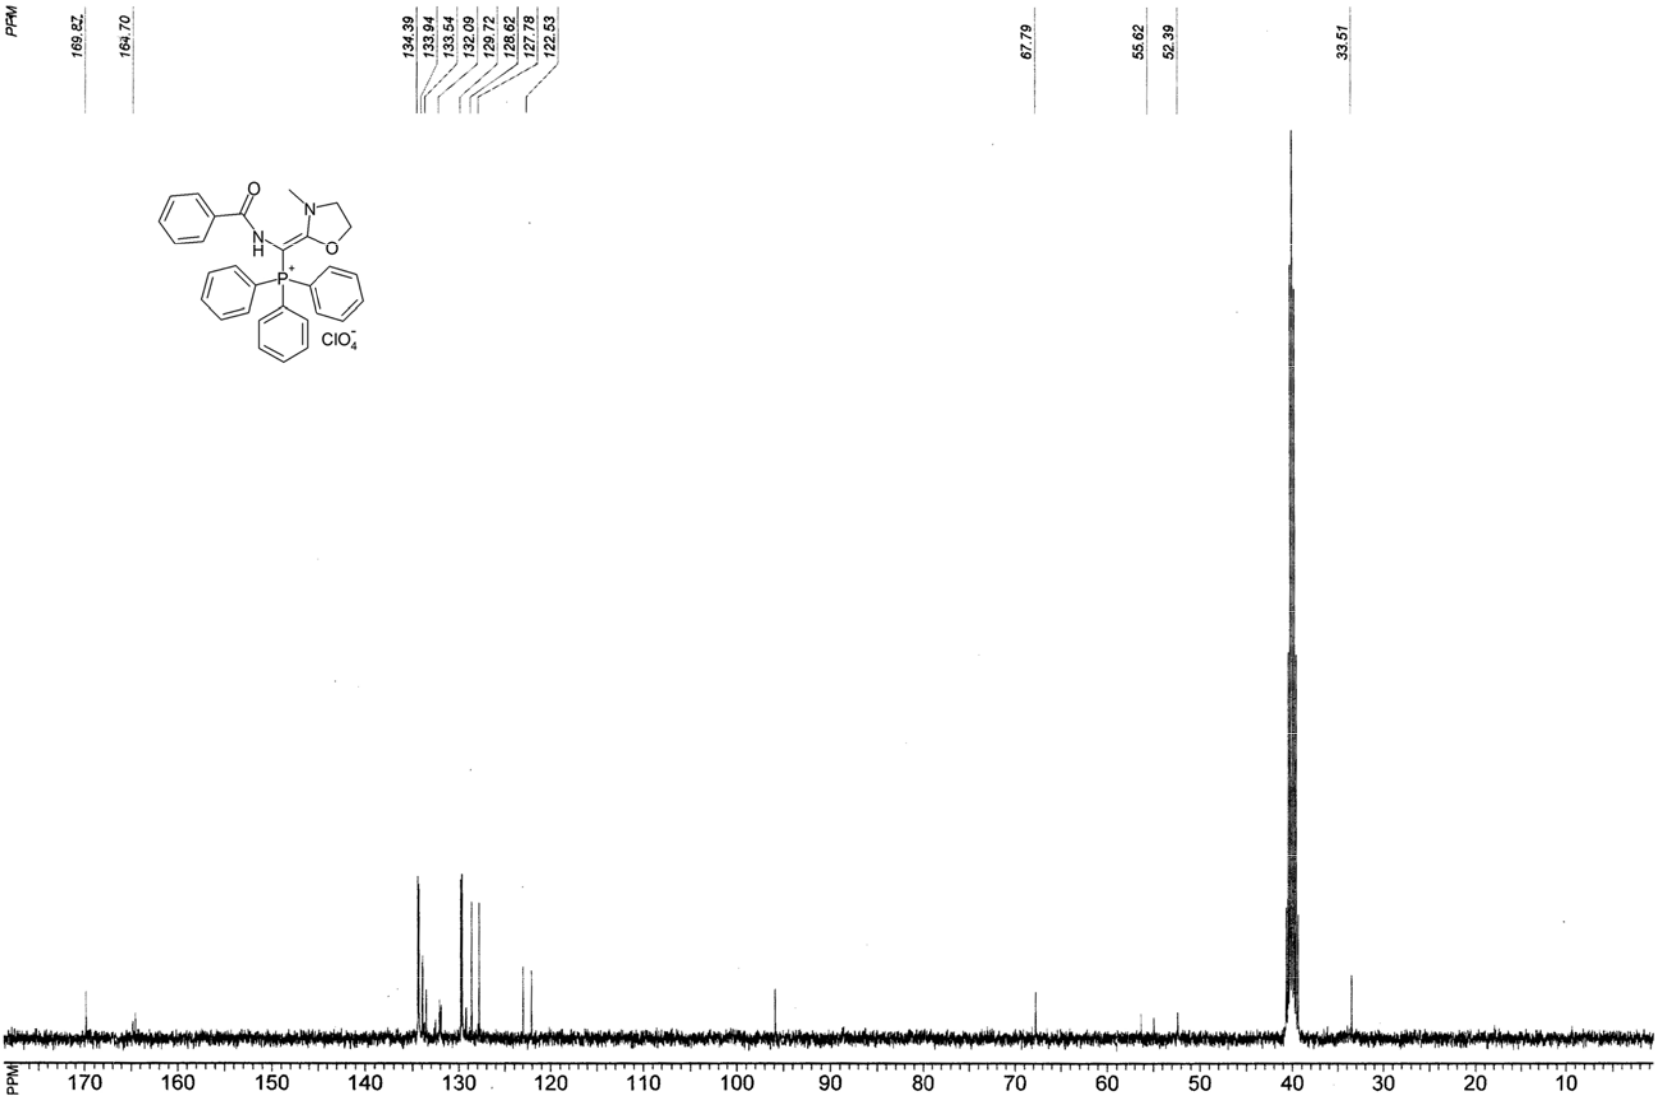


**Figure S 53.** 13C NMR spectrum of [Benzoylamino-(3-methyl-1,3-oxazolidin-2-yli ene)methyl]triphenylphosphon um perchlorate (**5d**).


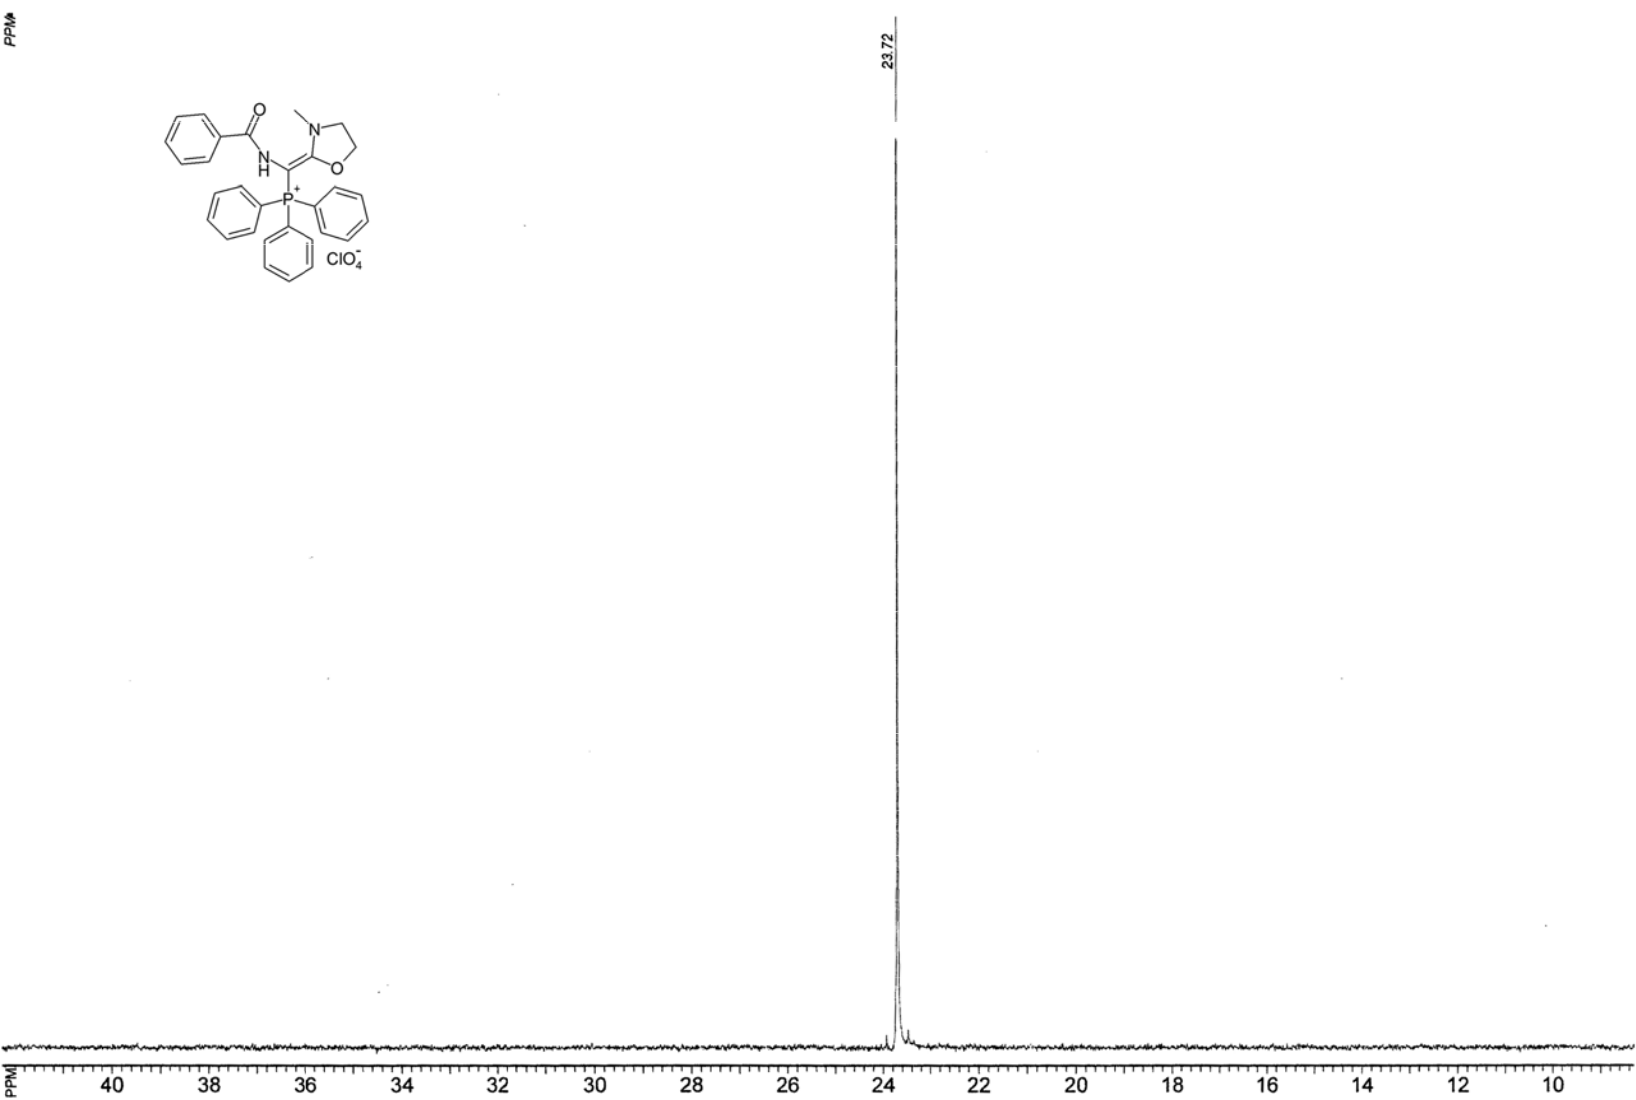


**Figure S 54.** 31P NMR spectrum of Benzoylamino-(3-methyl-1,3-oxazolidin-2-ylidene)methyl]triphenylphosphonium perchlorate (**5d**).


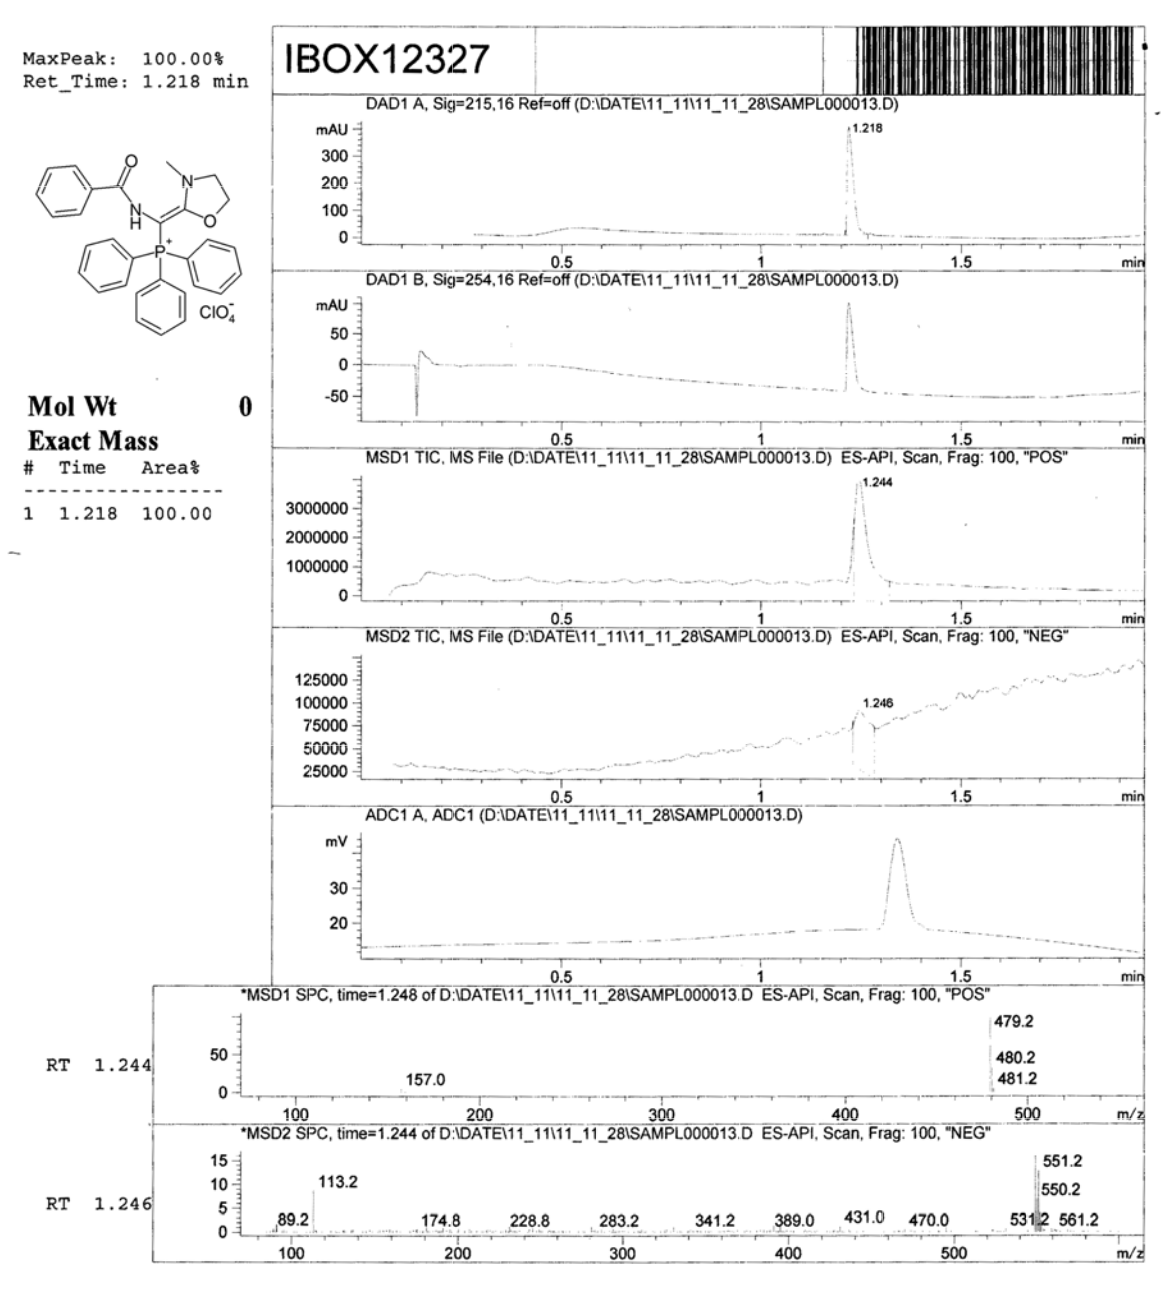


**Figure S 55.** LC-MS analy is report [Benzoylamino-(3-methyl-1,3-oxazolidin-2-ylide ne)methyl]triphenylph osphonium perchlorate (**5d**).


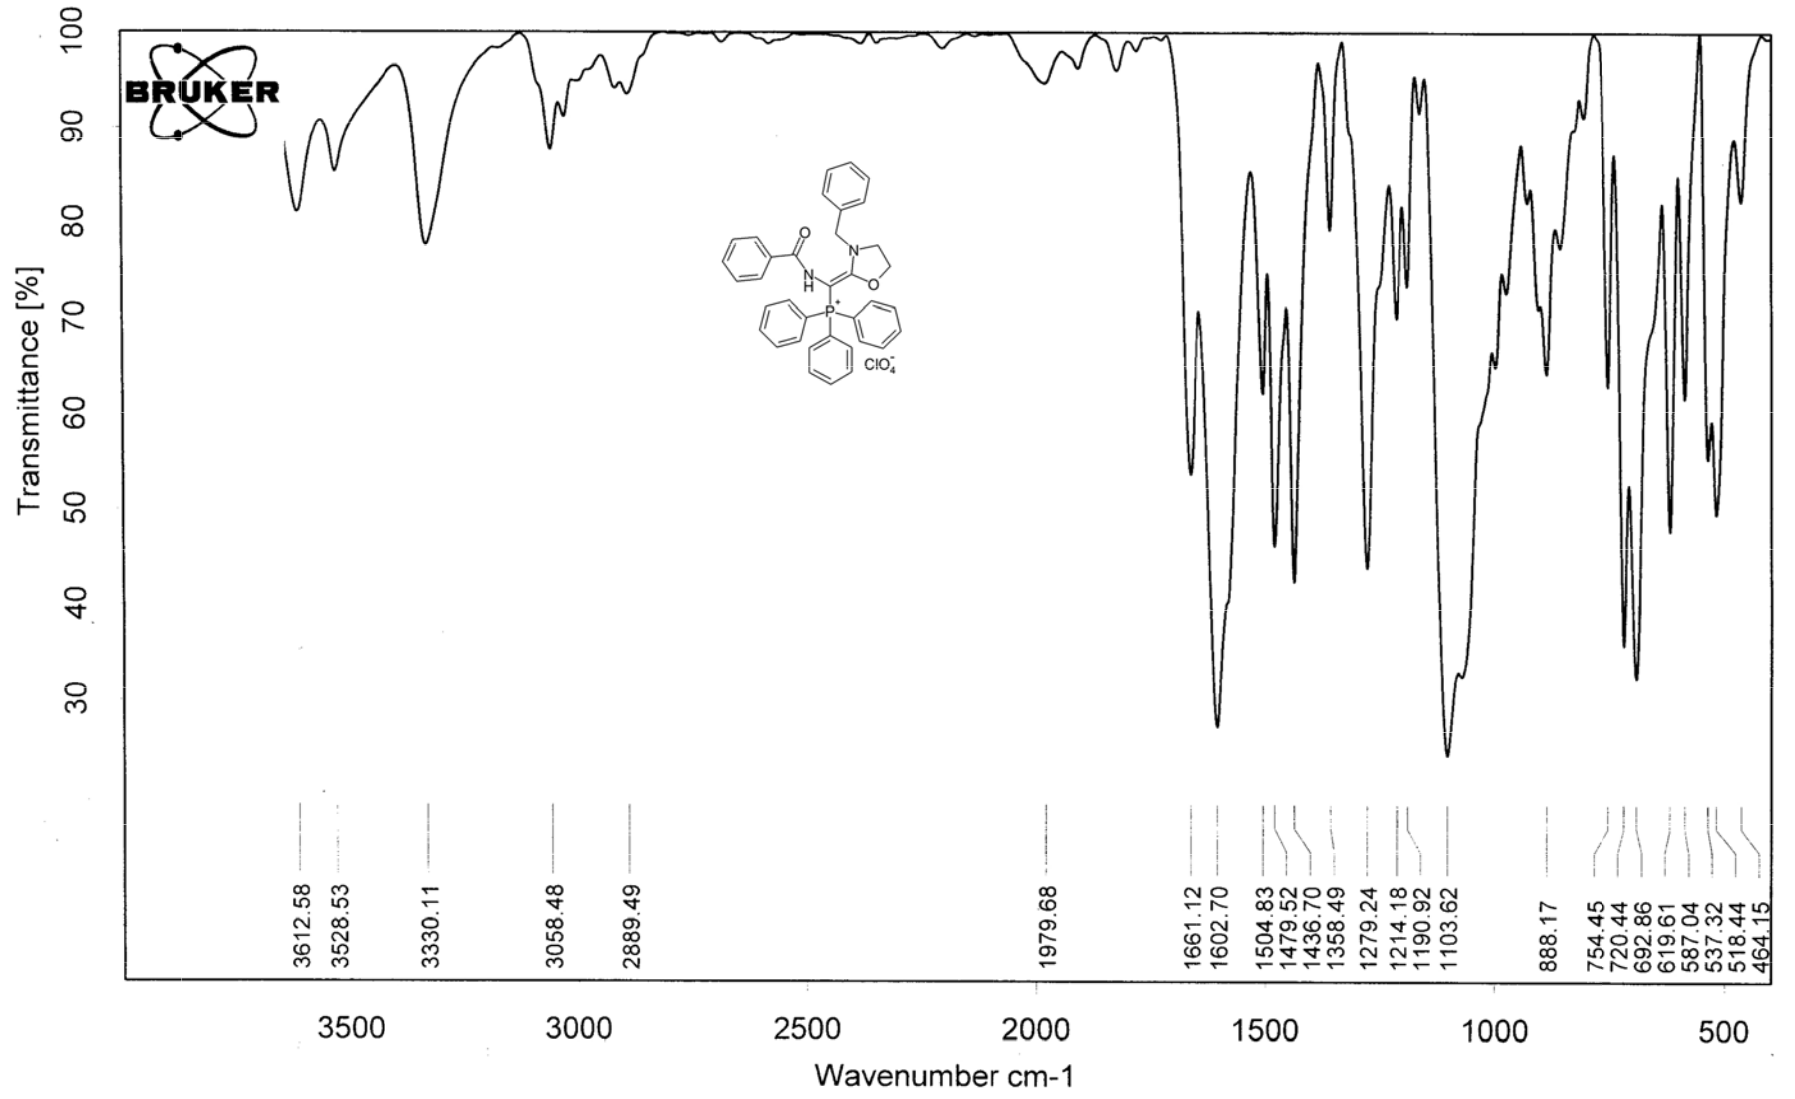


**Figure S 56.** IR (KBr) spectrum of [Benzoylamino-(3-benzyl-1,3-oxazolidin-2-ylidene)met yl]triphenylphosphonium perchlorate (**5e**).


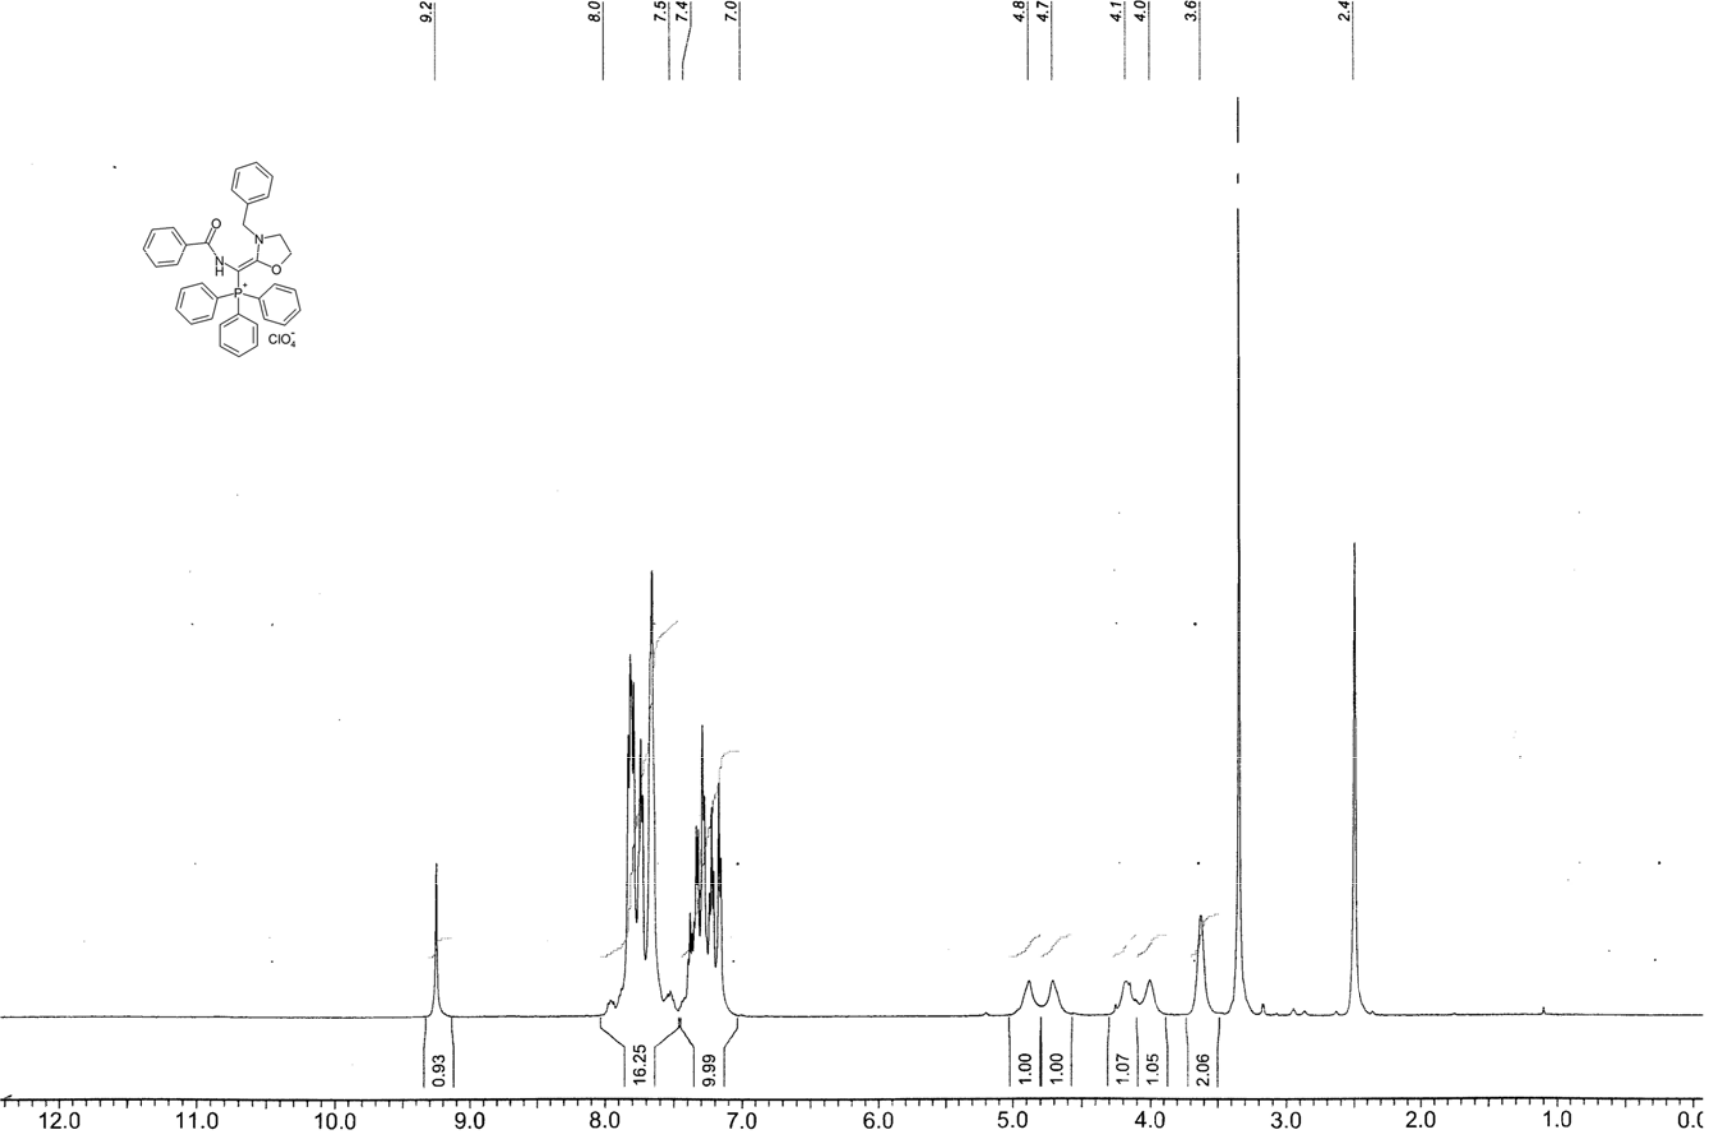


**Figure S 57.** 1H NMR spectrum of [Benzoylamino- 3-benzyl-1,3-o azolidin-2-ylidene)methyl]triphenylphosphoni m perchlorate(**5e**).


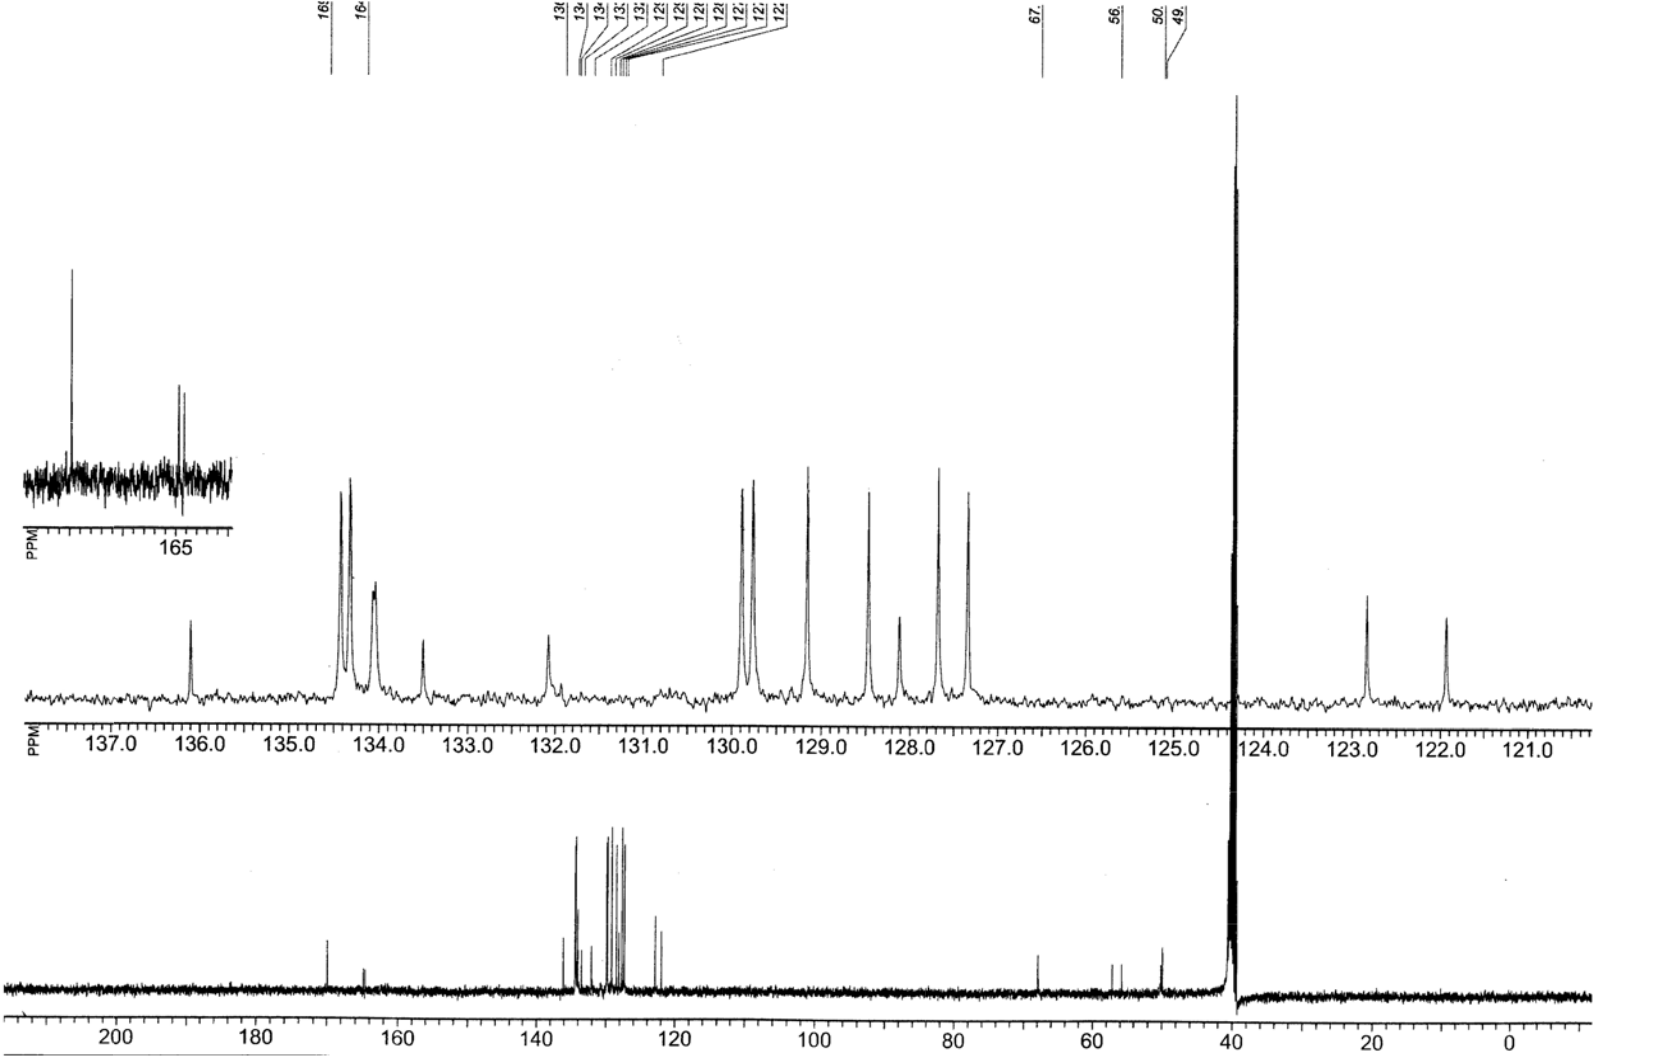


**Figure S 58.** 13C NMR spectrum of [Benzoylamino-(3-benzyl-1,3-oxazolidin-2-ylidene)methyl]triphenylphosphonium perchlorate (**5e**).


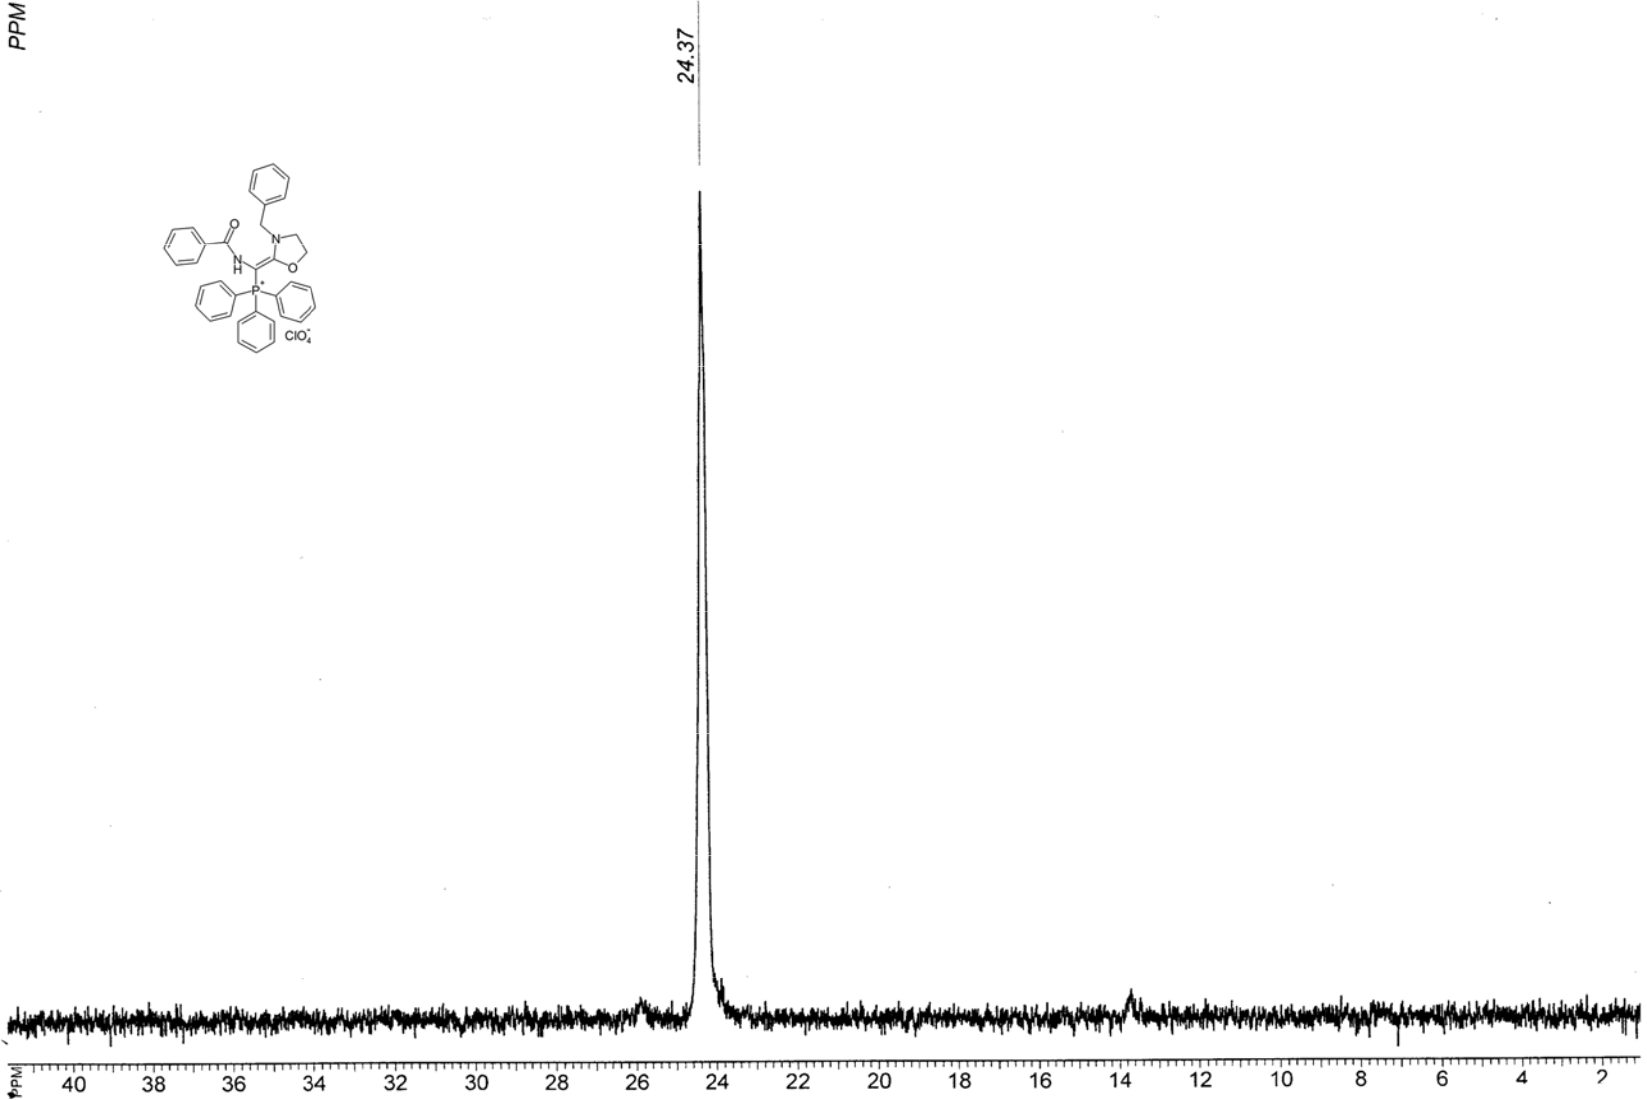


**Figure S 59.** 31P NMR spectrum of Benzoylamino-(3-benzyl-1,3-oxazolidin-2-ylidene)methyl]triphenylphosphonium perchlorate(**5e**).


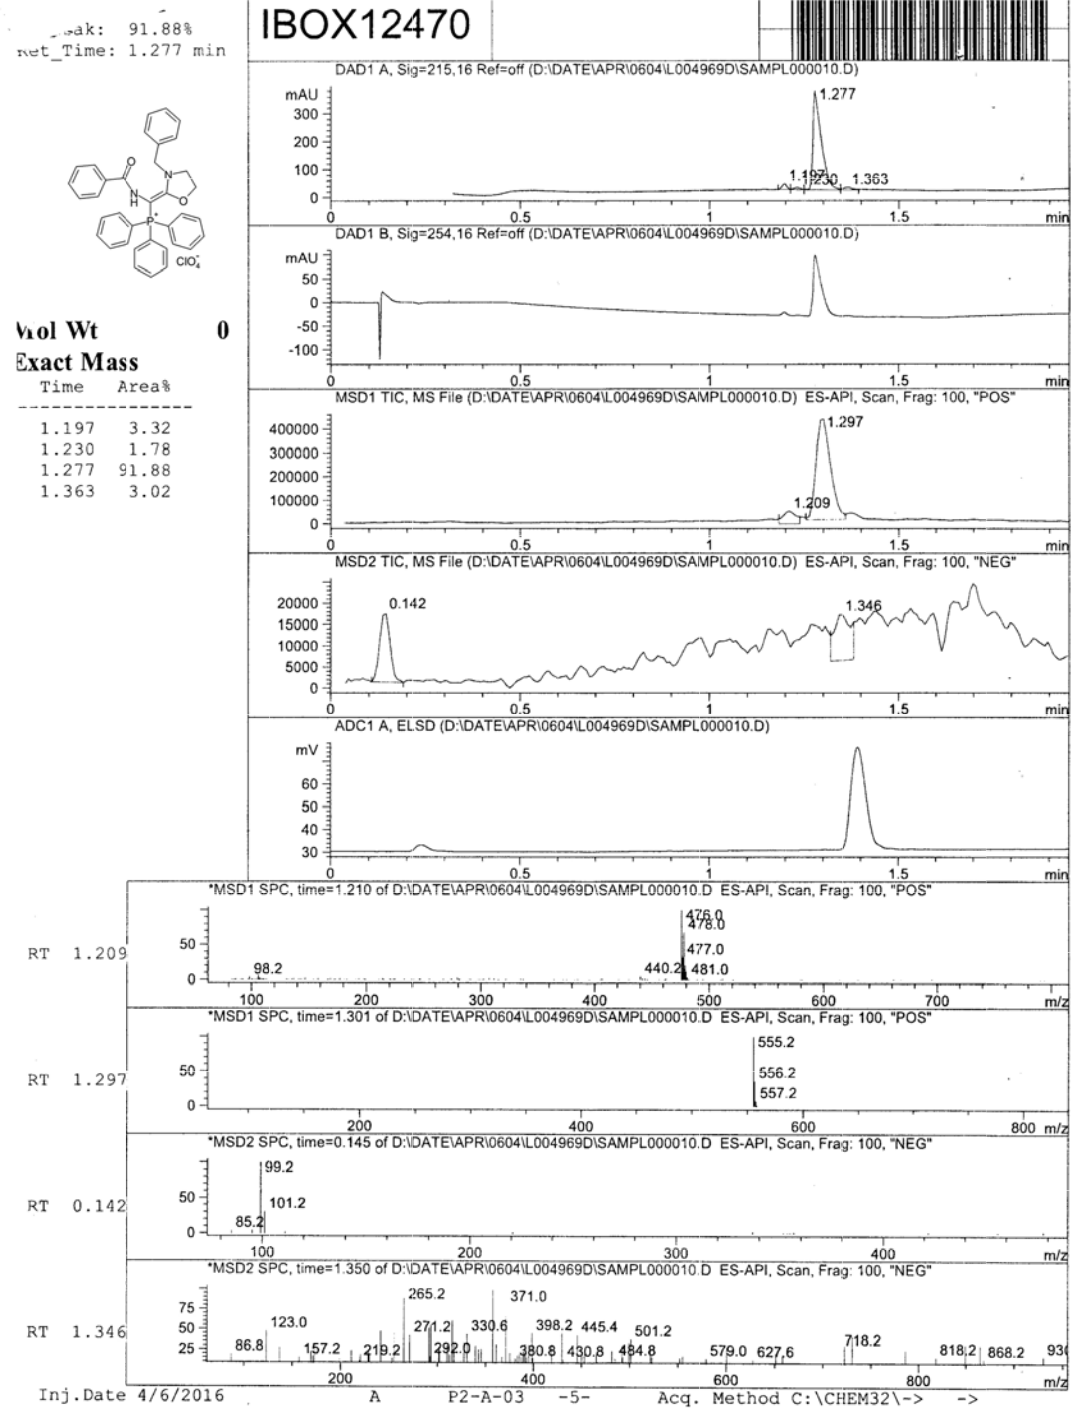


**Figure S 60.** LC-MS analy is report of[Benzoylamino-(3-benzyl-1,3-oxazolidin-2-ylide ne)methyl]triphenylph osphonium perchlorate (**5e**).


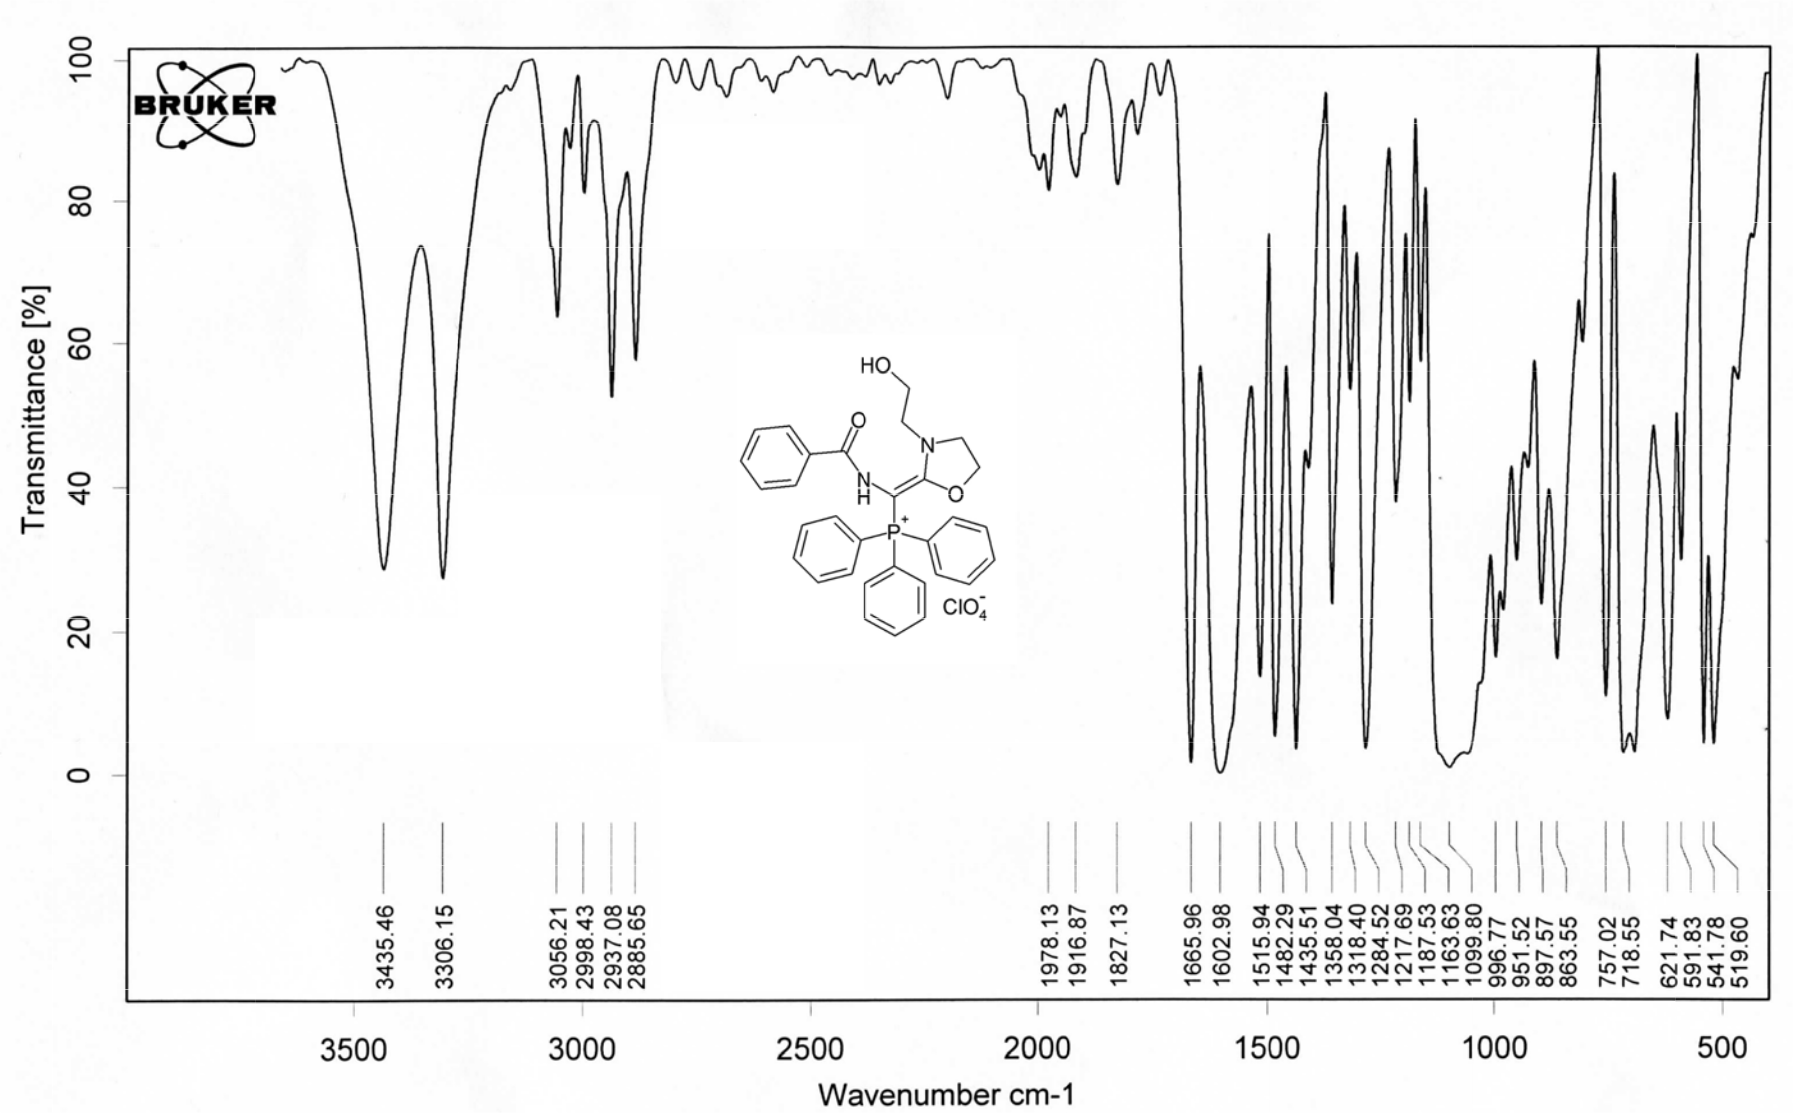


**Figure S 61.** IR (KBr) spectrum of {Benzoylamino-[3-(2-hydroxyethyl)-1,3-oxazolidin-2-ylidene]methyl}triphenylphosphonium perchlorate

(**5f**).


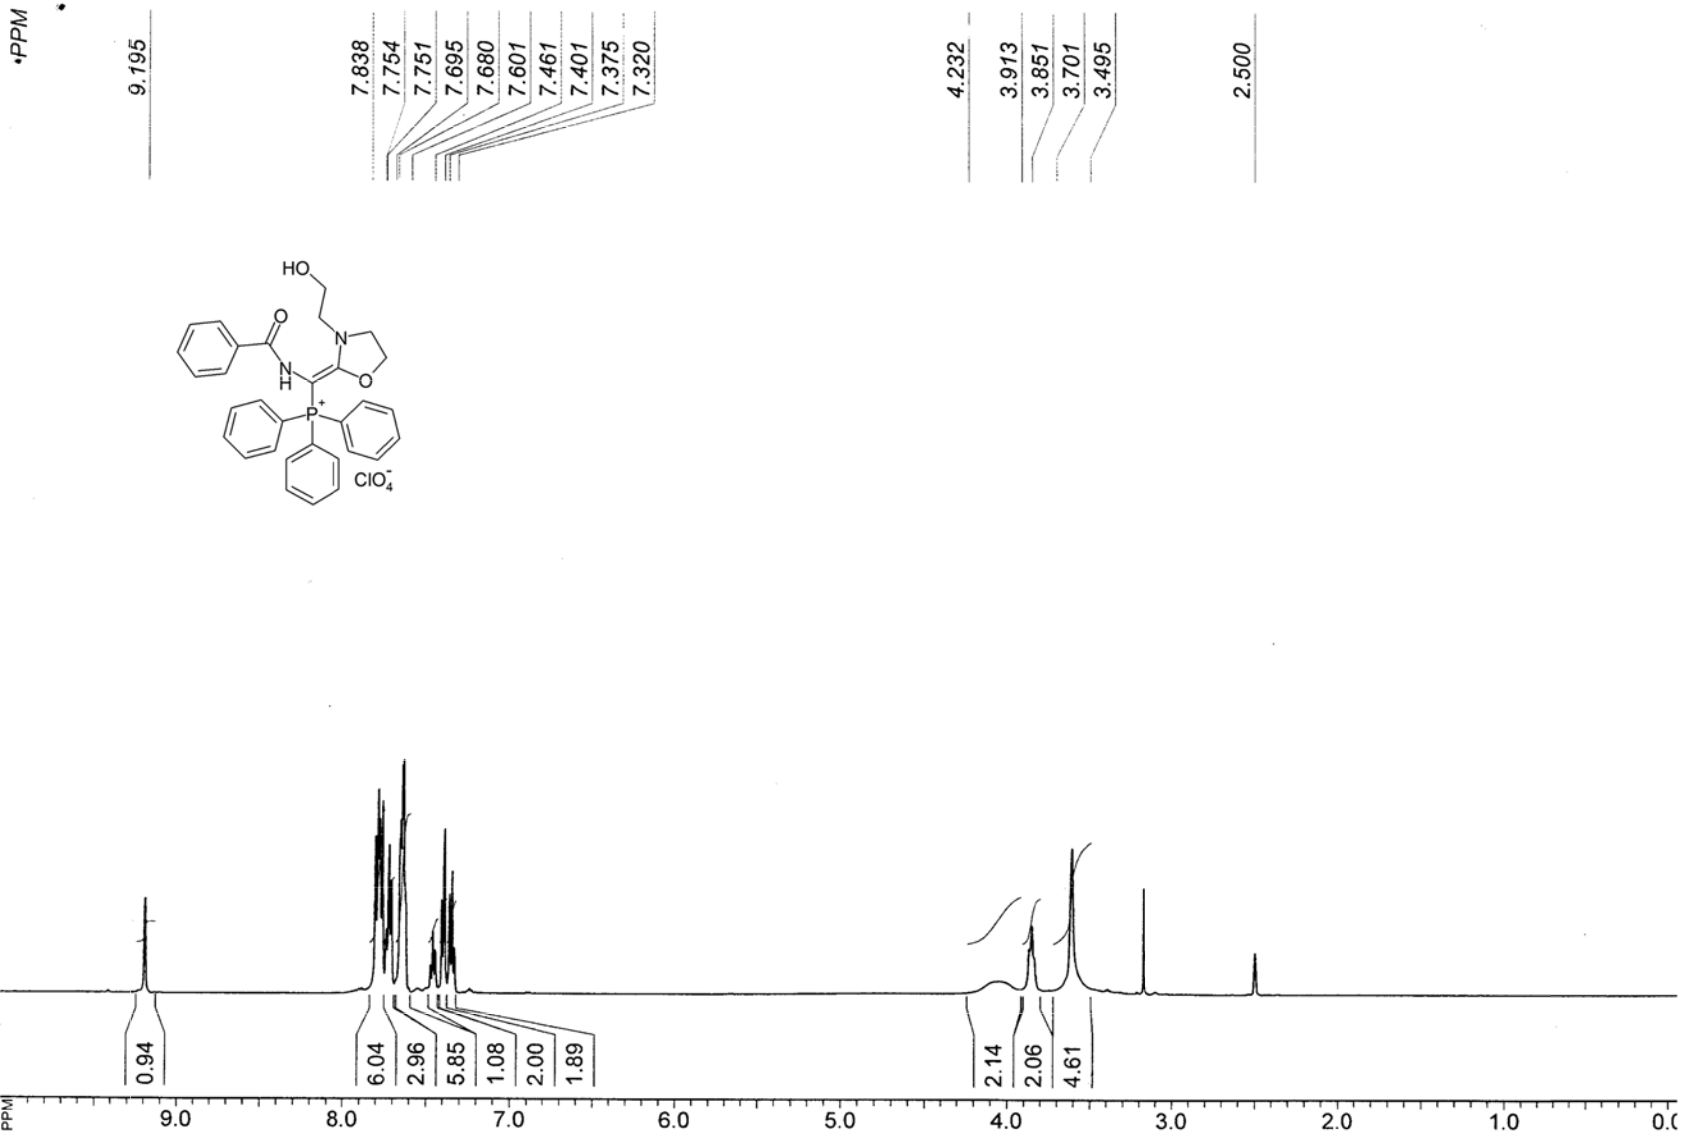


**Figure S 62.** 1H NMR spectrum of{Benzoylamino-[3-(2-hydroxyethyl)-1,3-oxazol din-2-ylidene]methyl}triphenylphosphonium perchlorate (**5f**).


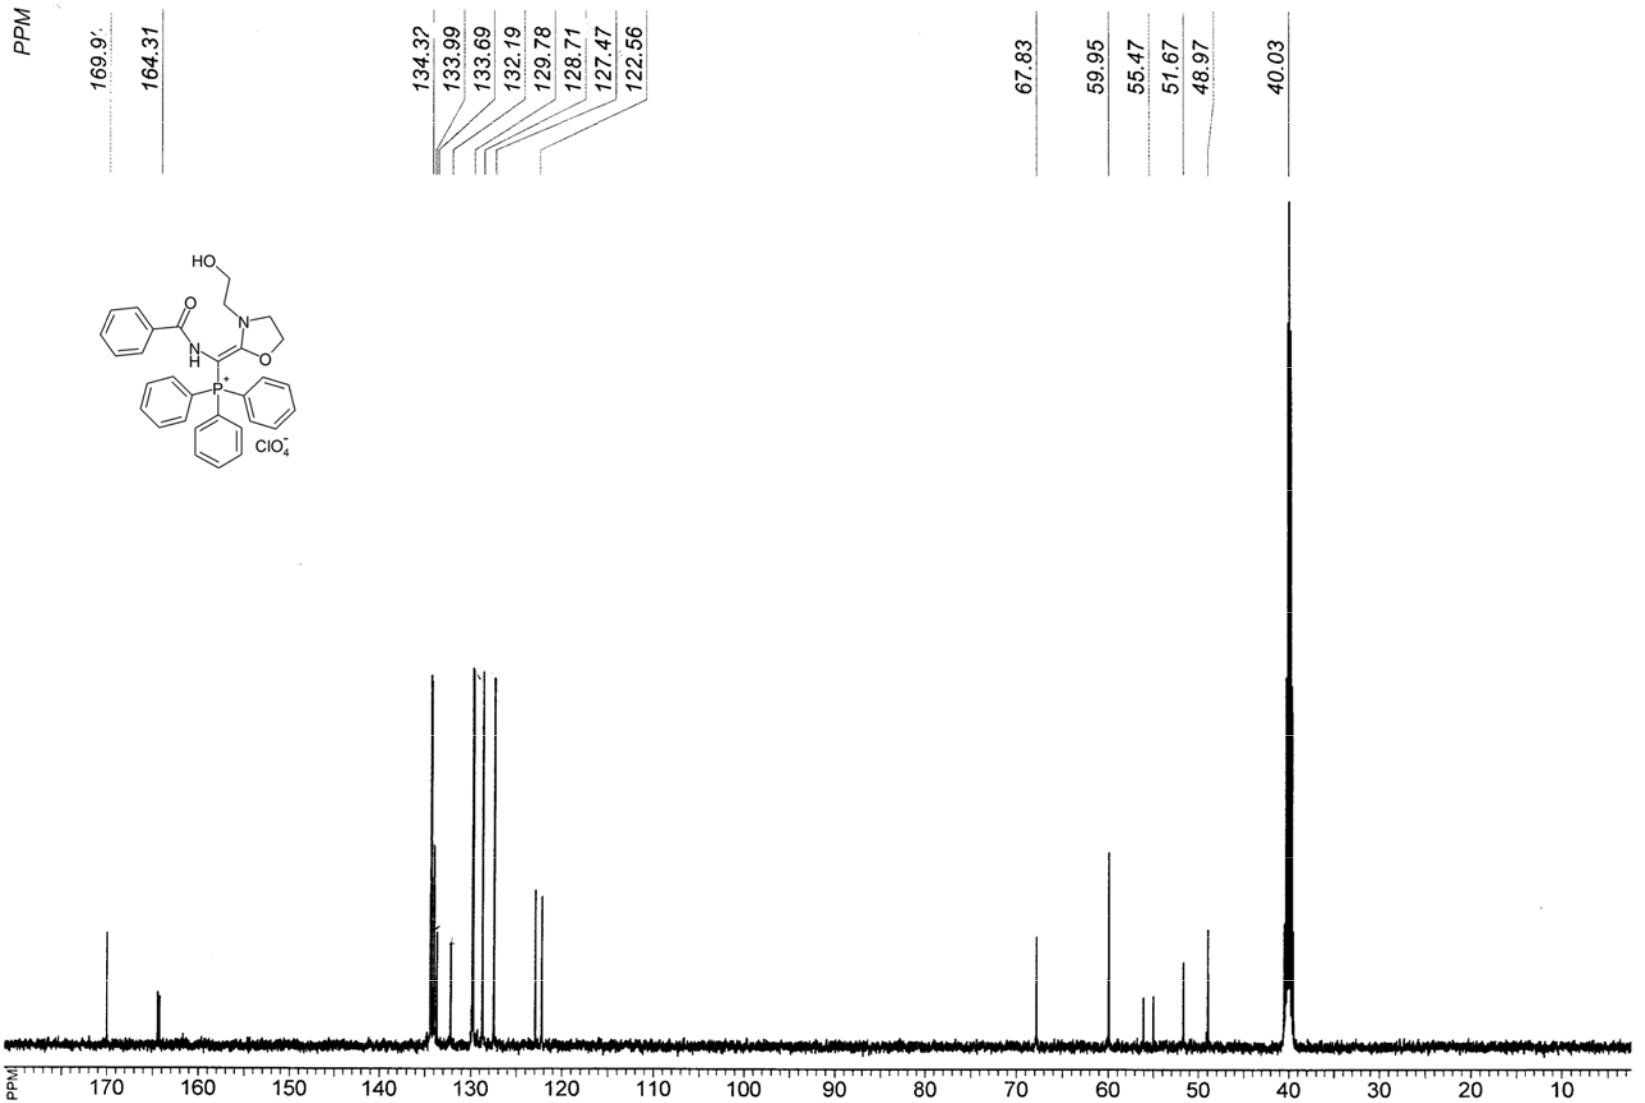


**Figure S 63.** 13C NMR spectrum of {Benzoylamino-[3-(2-hydroxyethyl)-1,3-oxazo idin-2-ylidene]methyl}triphenylphosphoniumperchlorate (**5f**).


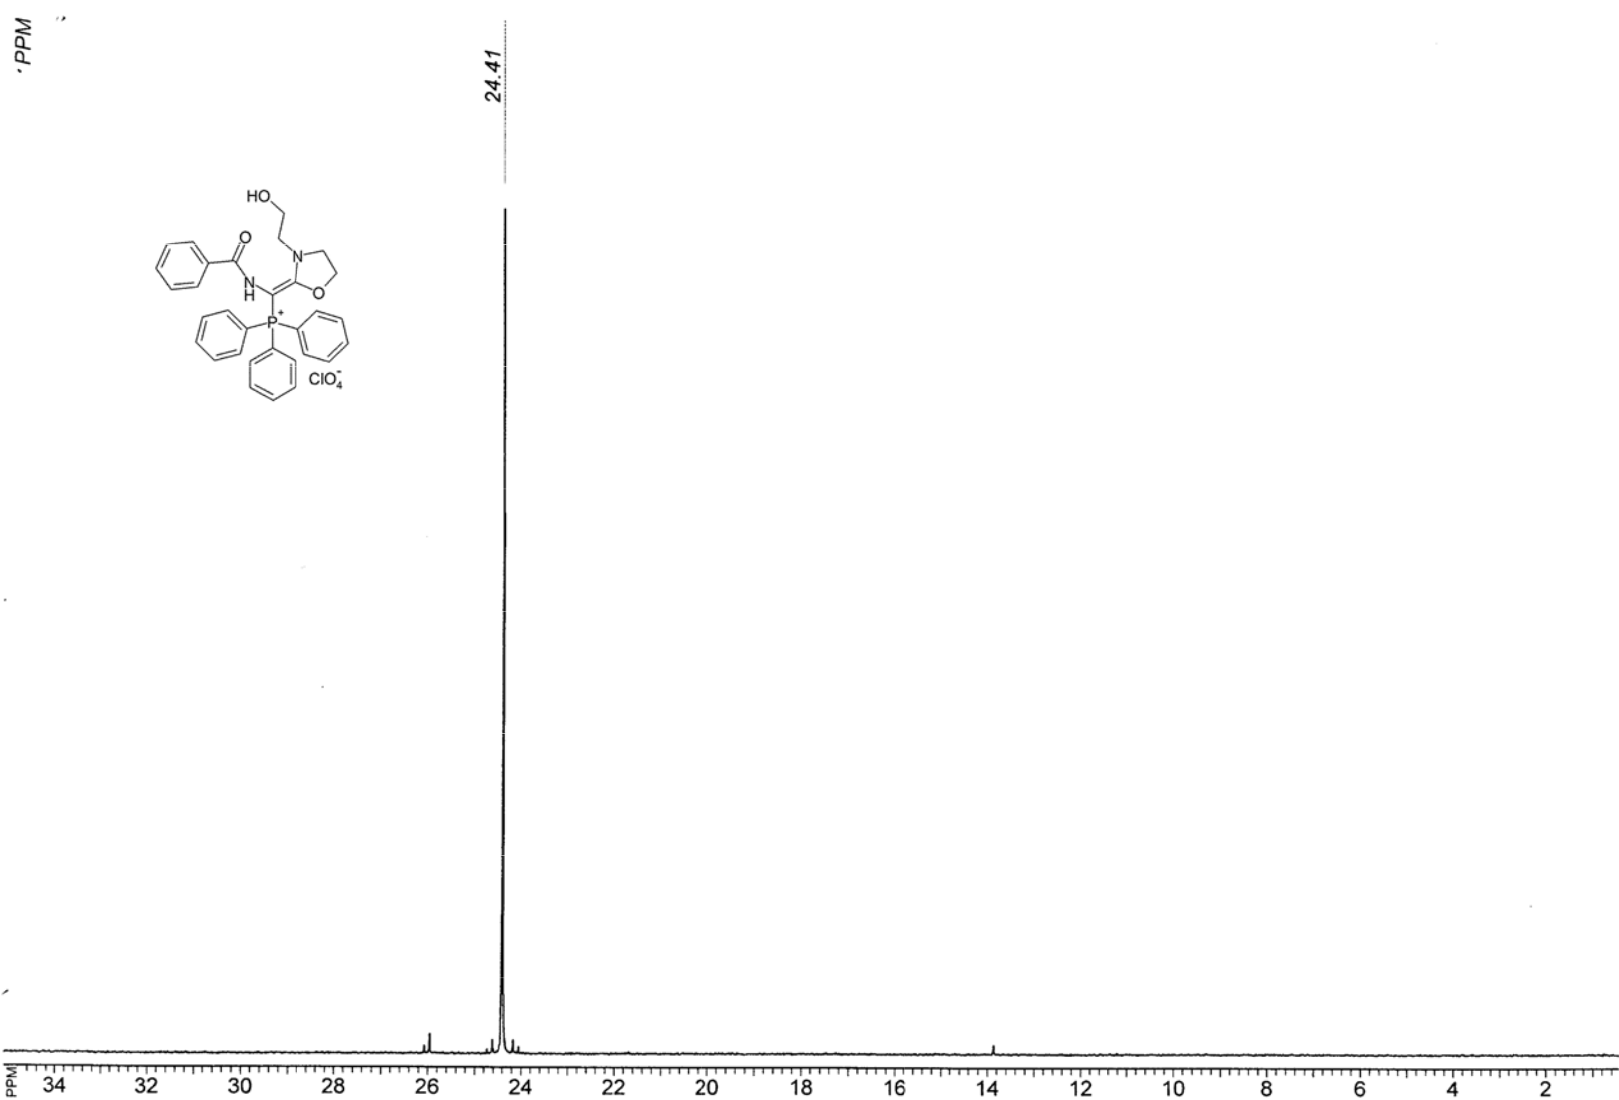


**Figure S 64.** 31P NMR spectrum of{Benzoylamino [3-(2-hydroxyethyl)-1,3-oxazolidin-2-ylidene]methyl}triphenylphosphoniumperchlorate (**5f**).

**Figu** ylide

**re S 65.** LC-MS analy is report ofne]methyl} triphenylp hosphonium


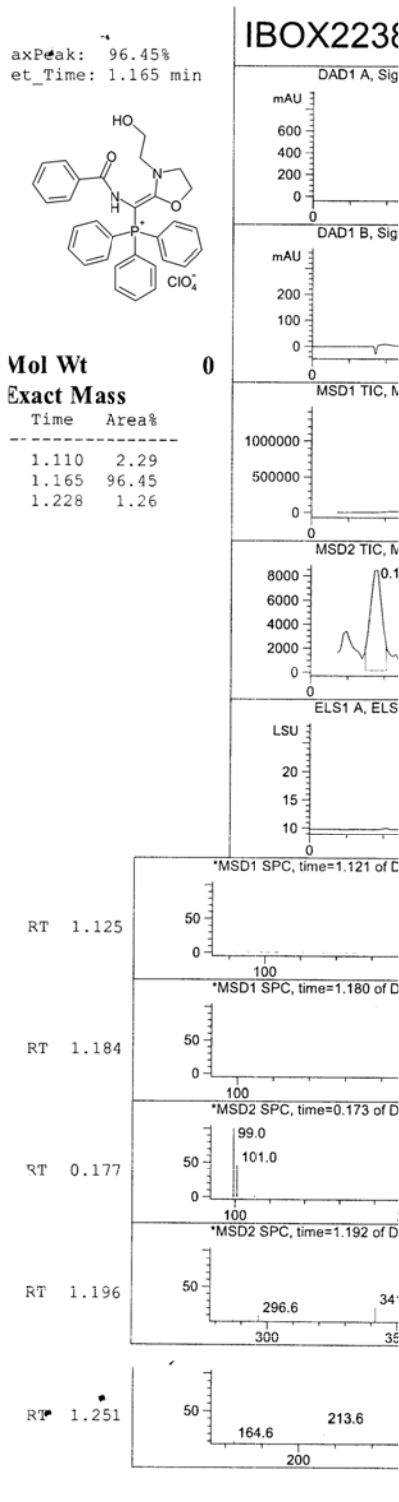


{Benzoyla perchlorat


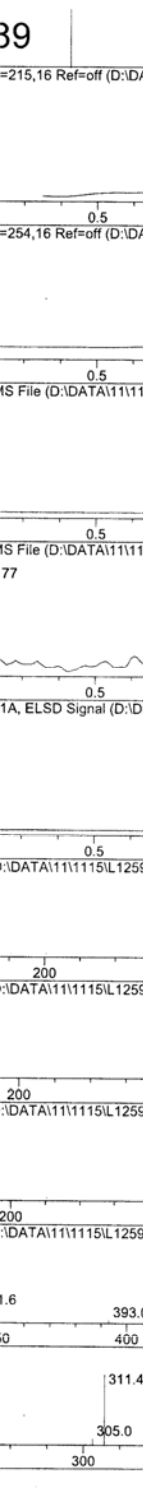


mino-[3-(2-hydroxyet hyl)-1,3-oxazolidin-ee (**5f**).


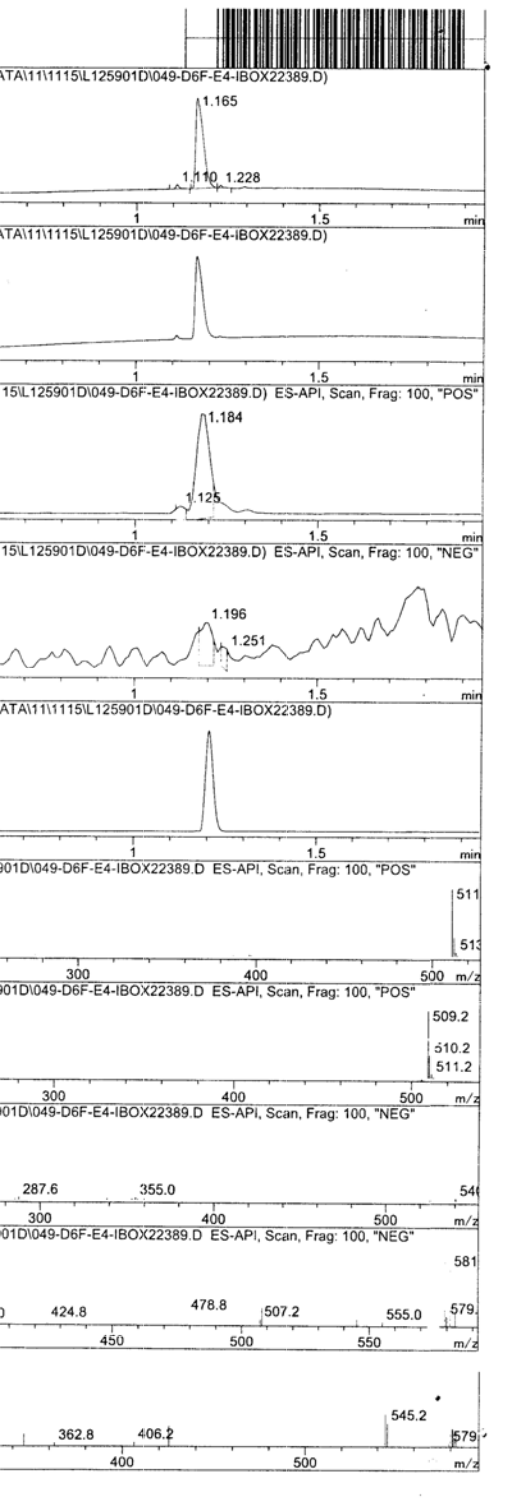


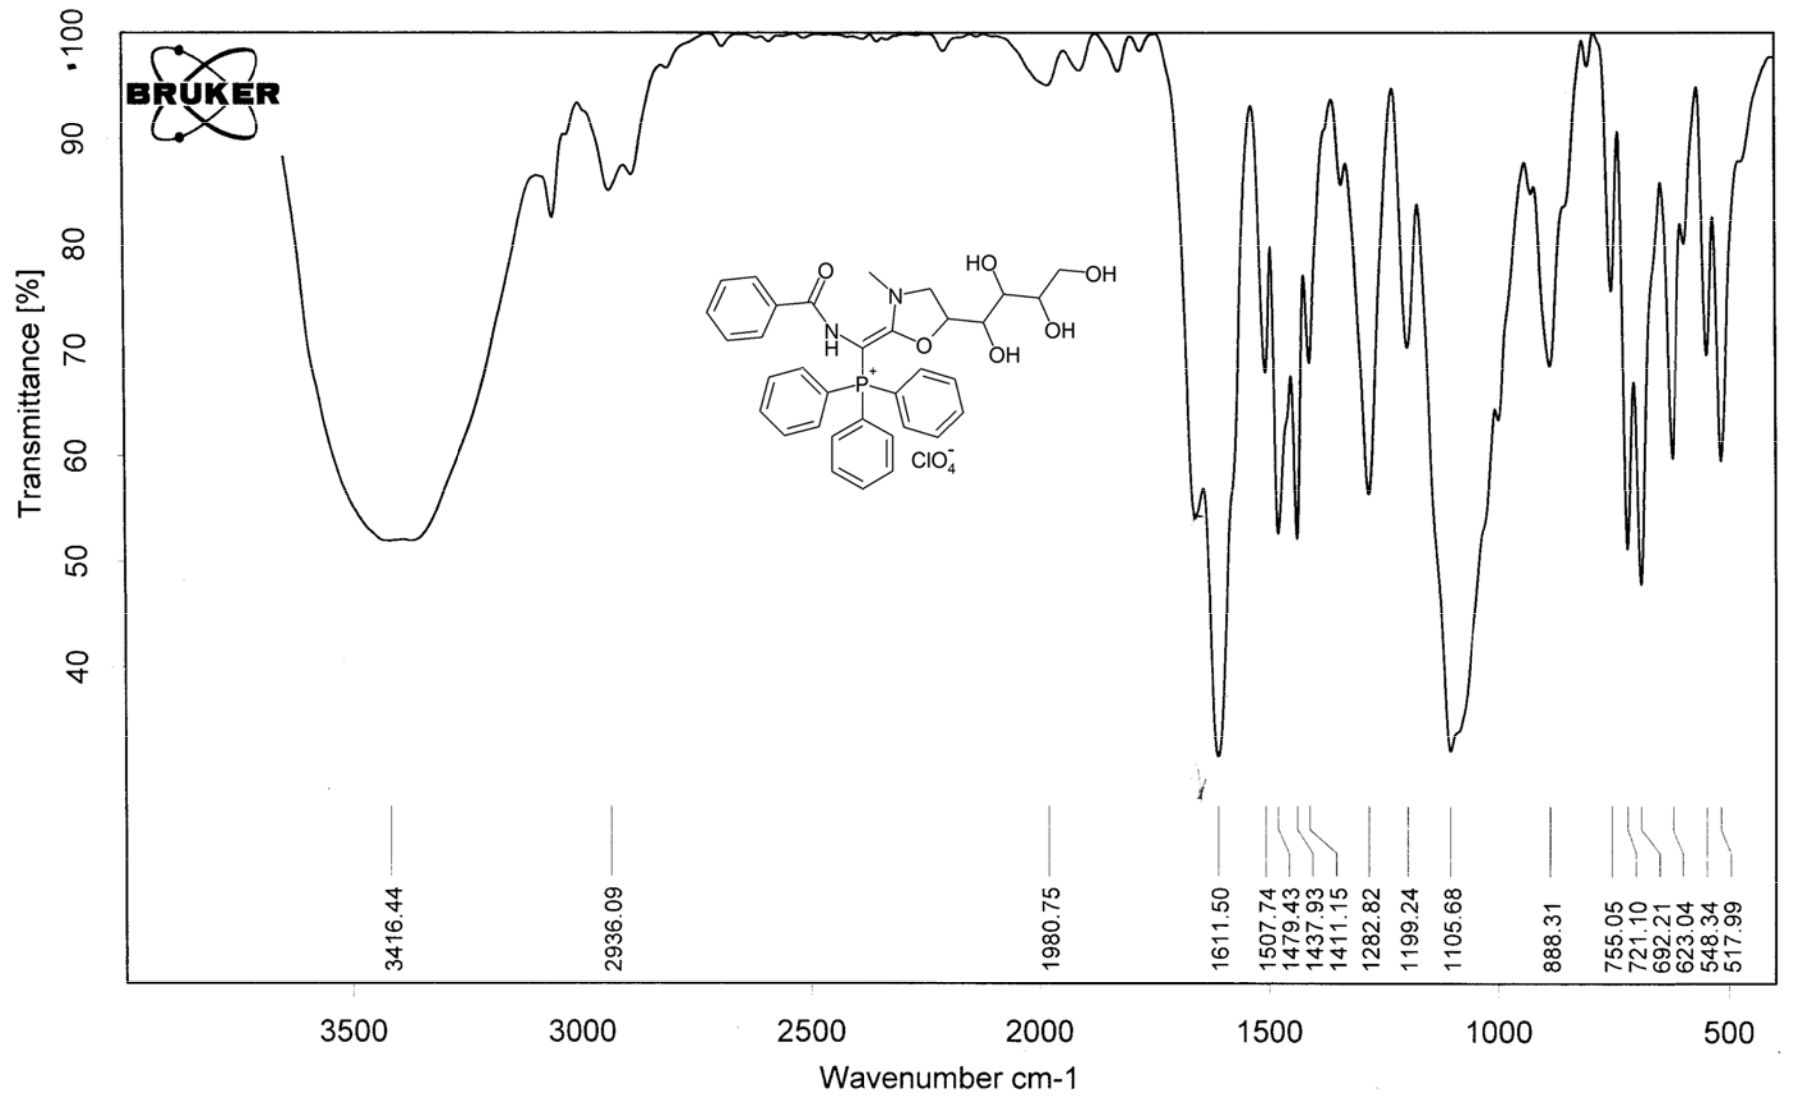


**Figure S 66.** IR (KBr) spectrum of {Benzoylamino-[3-methyl-5-((1S,2R,3S)-1,2,3,4-tetrahydroxybutyl)-1,3-oxazolidin-2-ylidene]met hyl}triphenylph osphonium perchlorate (**5g**).


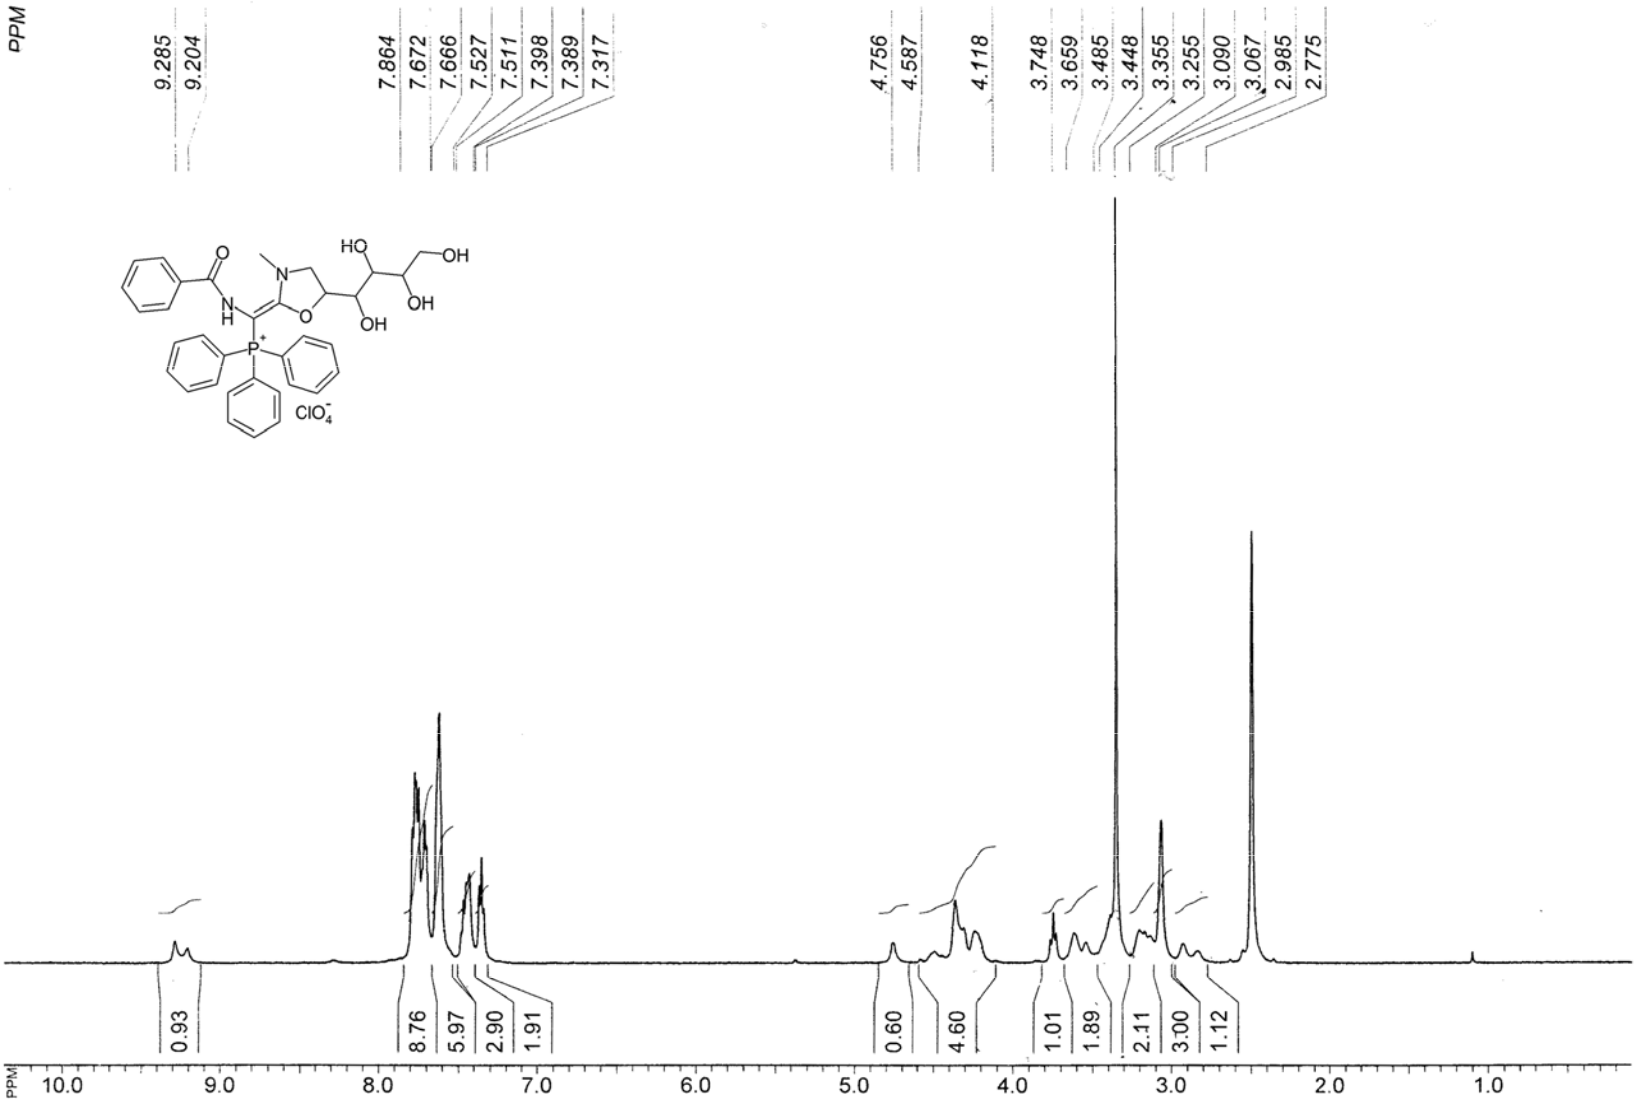


**Figure S 67.** 1H NMR spectrum of{Benzoylamino-[3-methyl-5-((1S,2R,3S)-1,2,3, -tetrahydroxybutyl)-1,3-oxazolidin-2-ylidene]methyl}triphenylphosphonium perchlorate (**5g**).


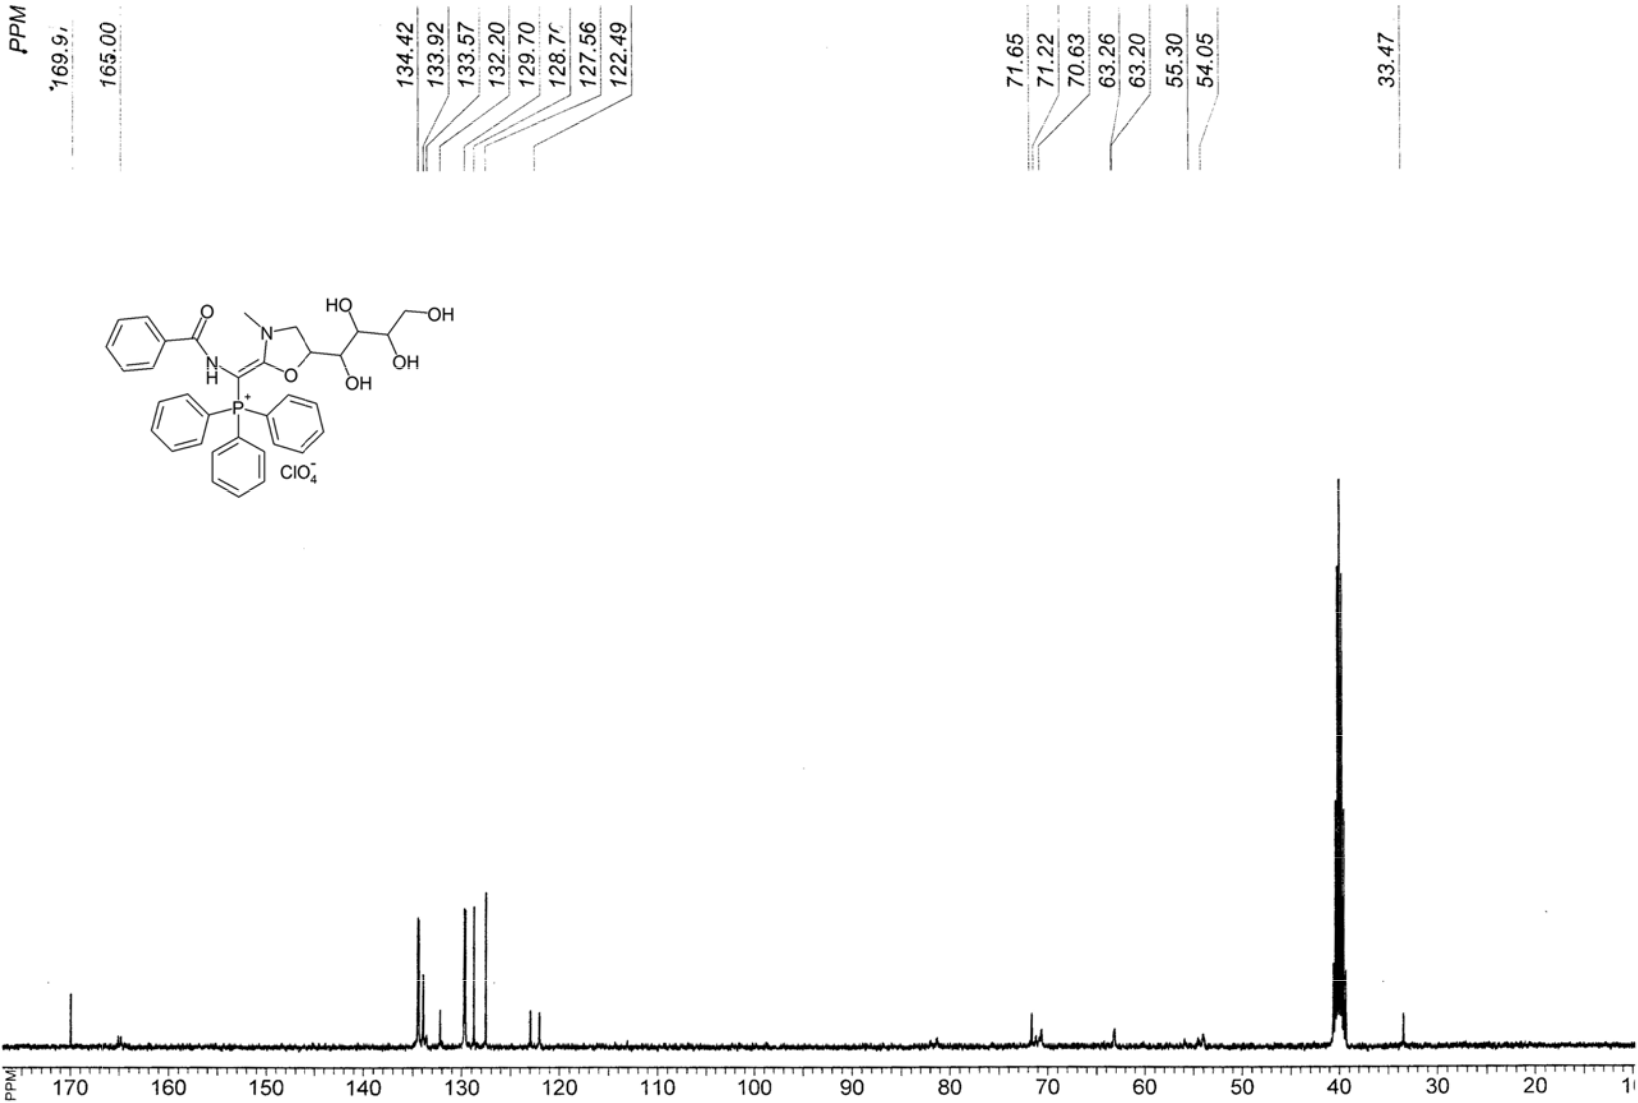


**Figure S 68.** 13C NMR spectrum of {Benzoylamino-[3-methyl-5-((1S,2R,3S)-1,2,3,4-tetrahydroxybutyl)-1,3-oxazolidin-2-ylidene]methyl}triphenylphosphonium perchlorate (**5g**).


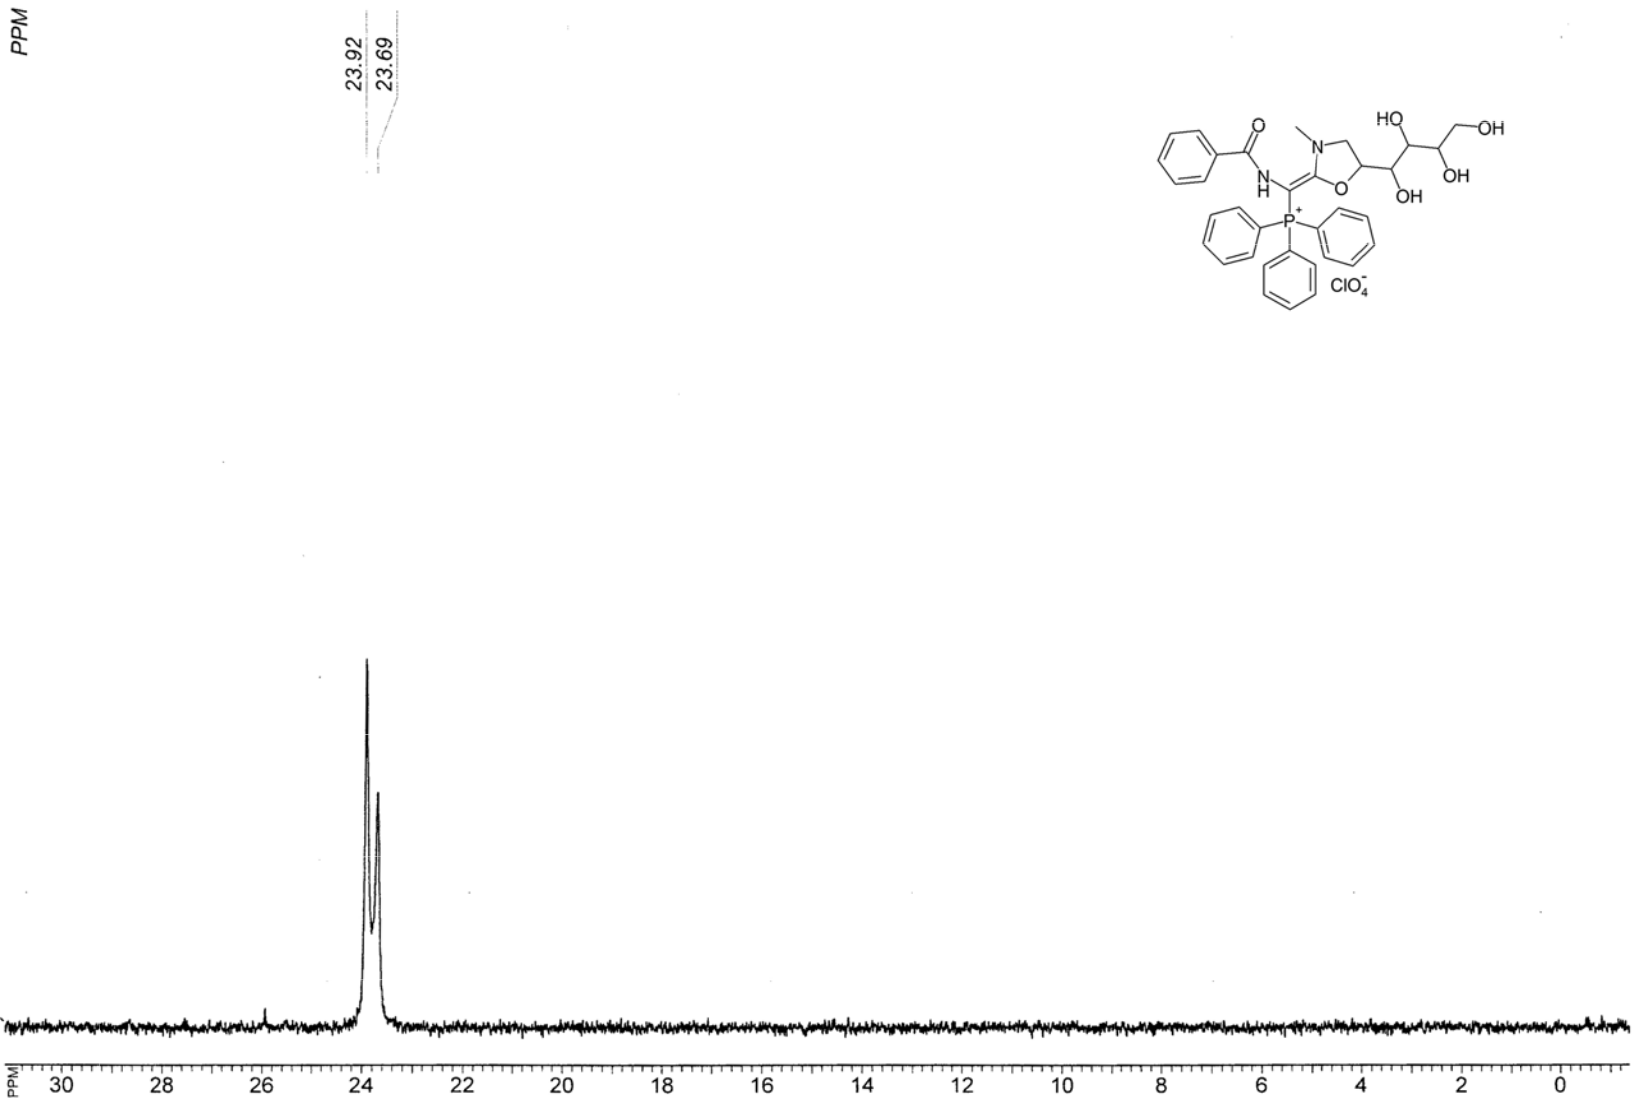


**Figure S 69.** 31P NMR spectrum of{Benzoylamino [3-methyl-5-((1S,2R,3S)-1,2,3,4-tetrahydroxybutyl)-1,3-oxazolidin-2-ylidene]methyl}triphenylphosphonium perchlorate (**5g**).


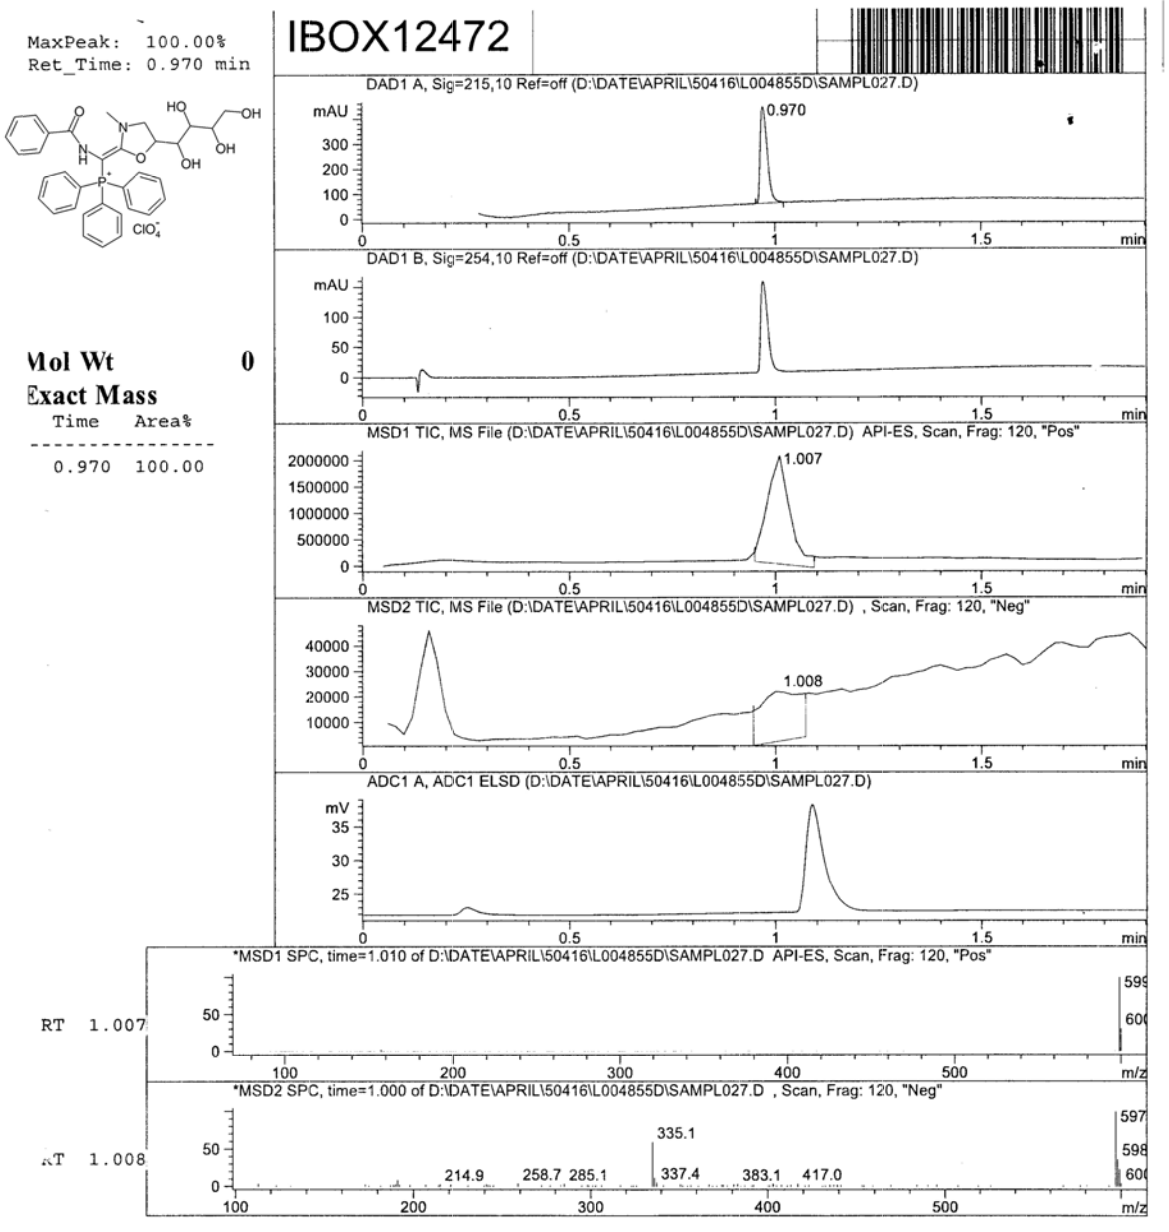


**Figure S 70.** LC-MS analy is report of{Benzoylamino-[3-methyl-5-((1S,2R,3S)-1,2,3,4-tetrahydroxybutyl)-1,3-oxazolidin-2-ylidene]met hyl}triphenylphosphon ium perchlorate (**5g**).


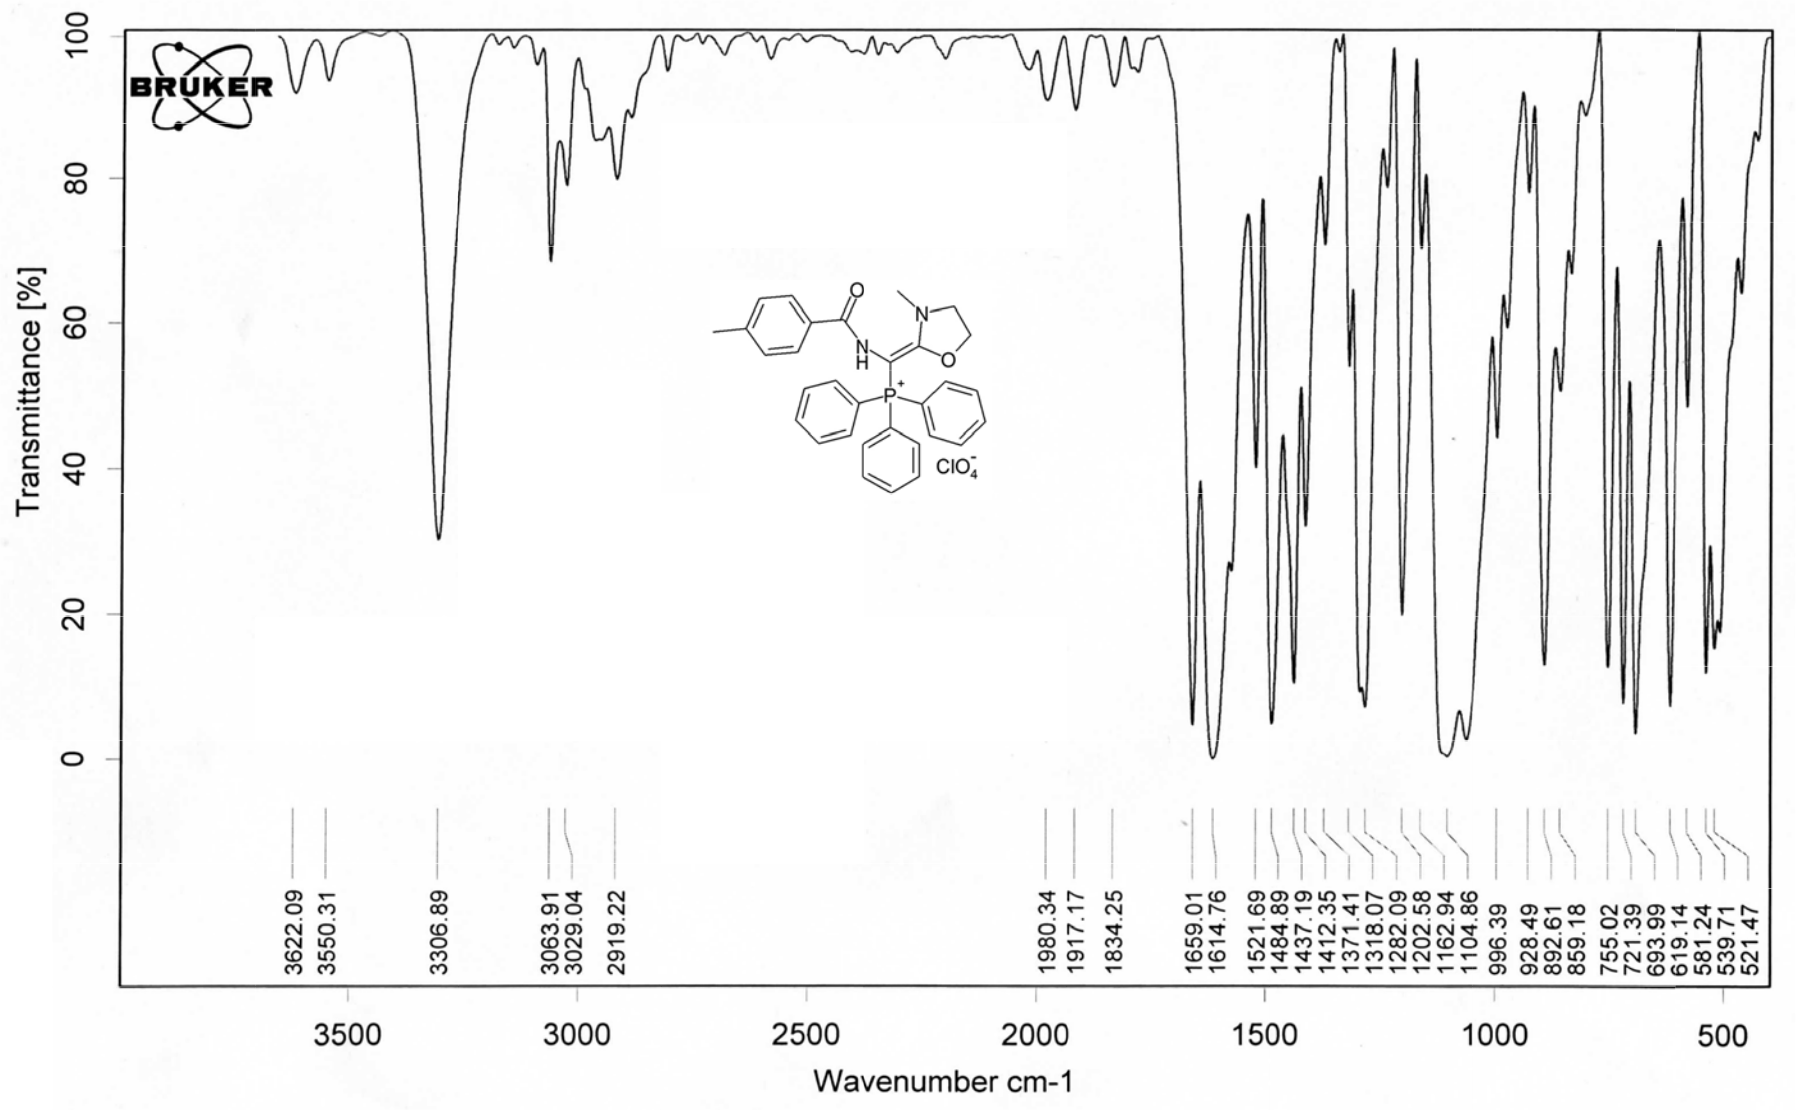


**Figure S 71.** IR (KBr) spectrum of {(4-Methylbenzoyl)amino-[3-methyl-1,3-oxazolidin-2-ylidene]methyl}triphenylphosphonium perchlorate

(**5h**).


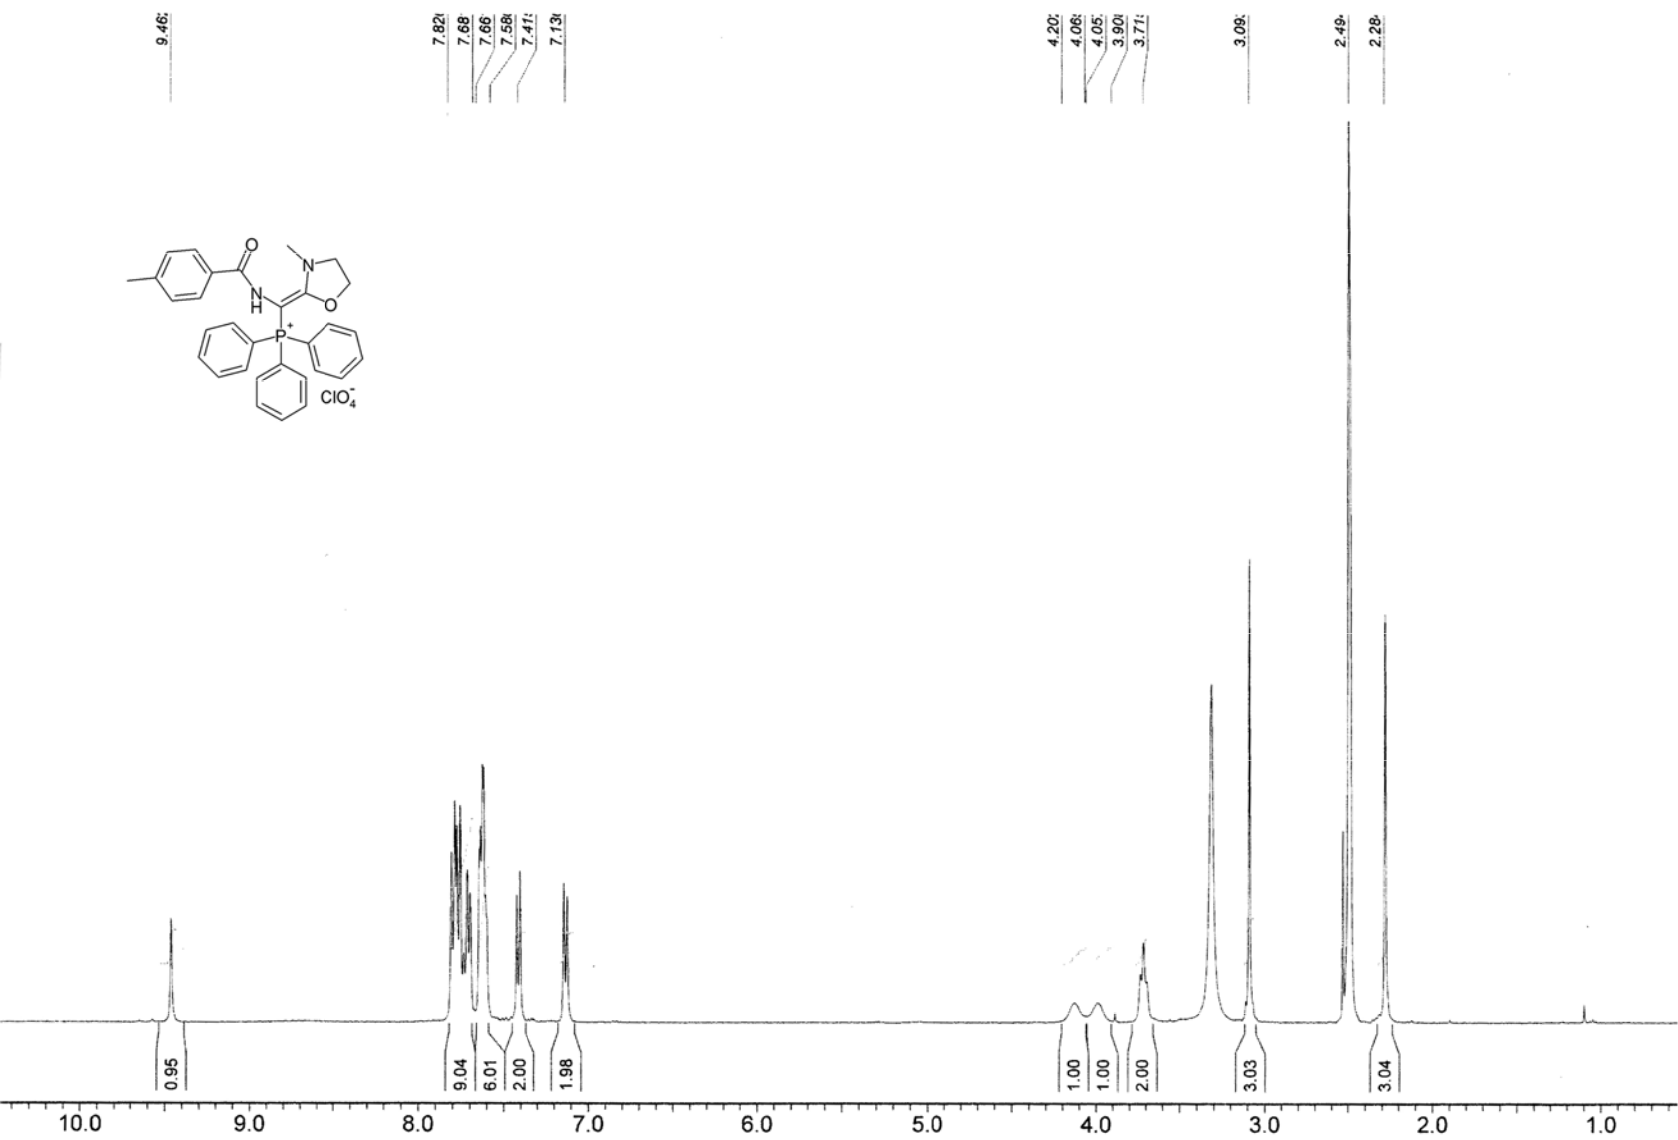


**Figure S 72.** 1H NMR spectrum of{(4-Methylbenz yl)amino-[3-methyl-1,3-oxazolidin-2-ylidene]methyl}triphenylphosphoniumperchlorate (**5h**).


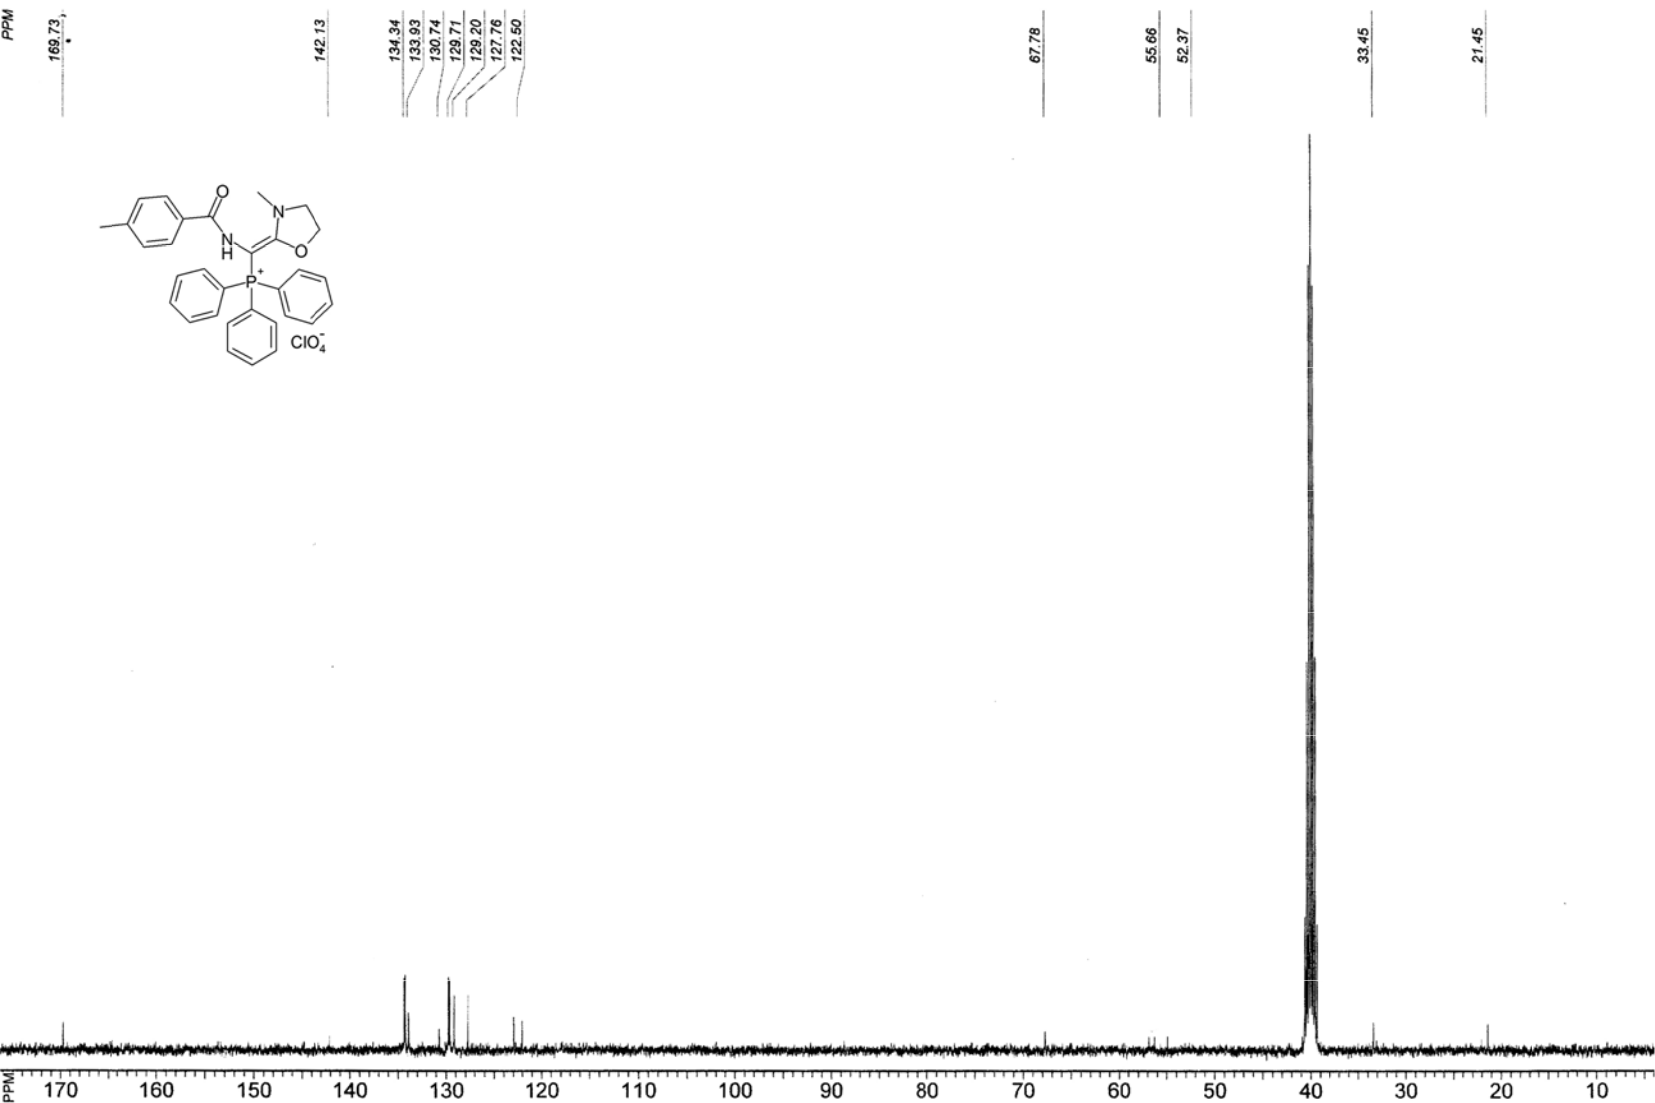


**Figure S 73.** 13C NMR spectrum of {(4-Methylbenzoyl)amino-[3-methyl-1,3-oxazolidin-2-ylidene]methyl}triphenylphosphoniumperchlorate (**5h**).


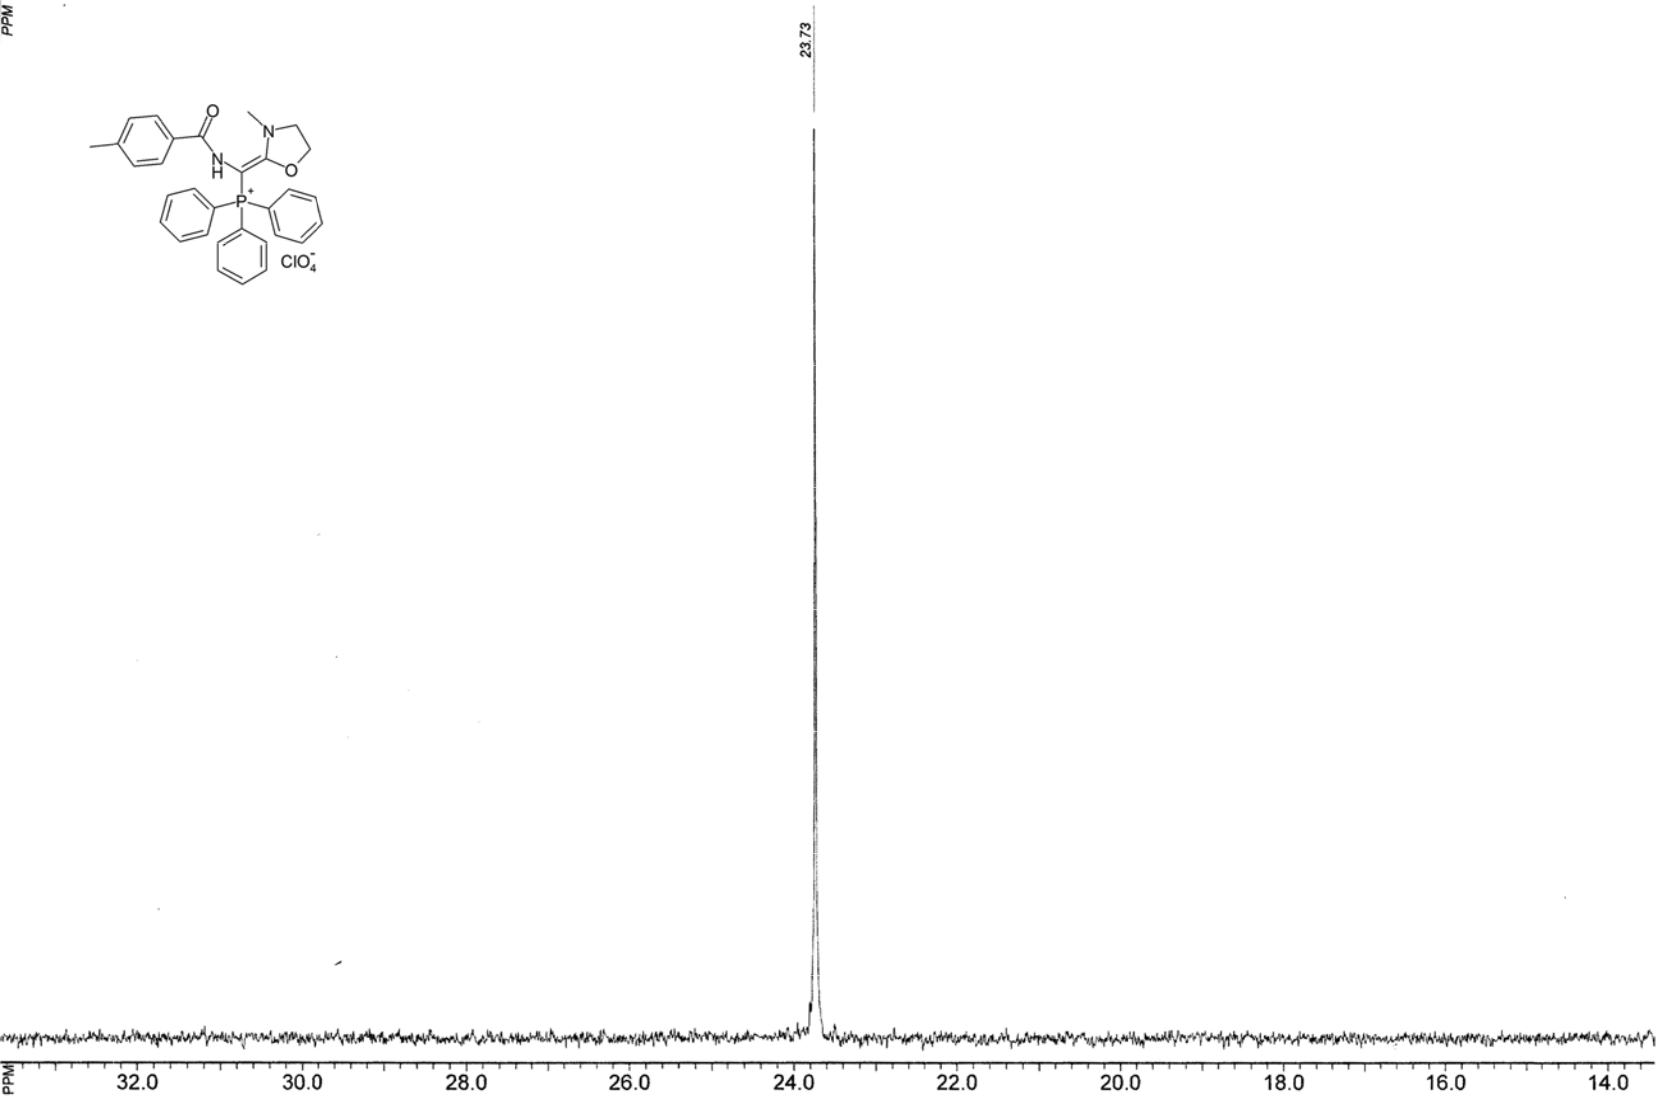


**Figure S 74.** 31P NMR spectrum of{(4-Methylbenzoyl)amino-[3-methyl-1,3-oxazolidin-2-ylidene]methyl}triphenylphosphonium erchlorate (**5h**)

**Figu** ylide

**re S 75.** LC-MS analy is report ofne]methyl} triphenylp hosphonium


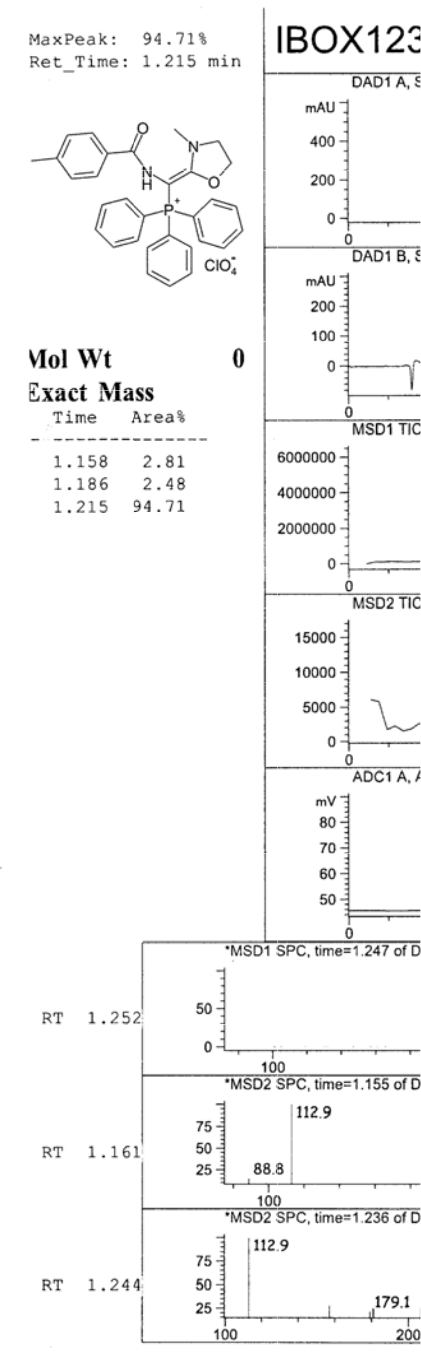


{(4-Methy lbenzoyl)a mino-[3-me thyl-1,3-ox azolidin-2-perchlorate (**5h**).


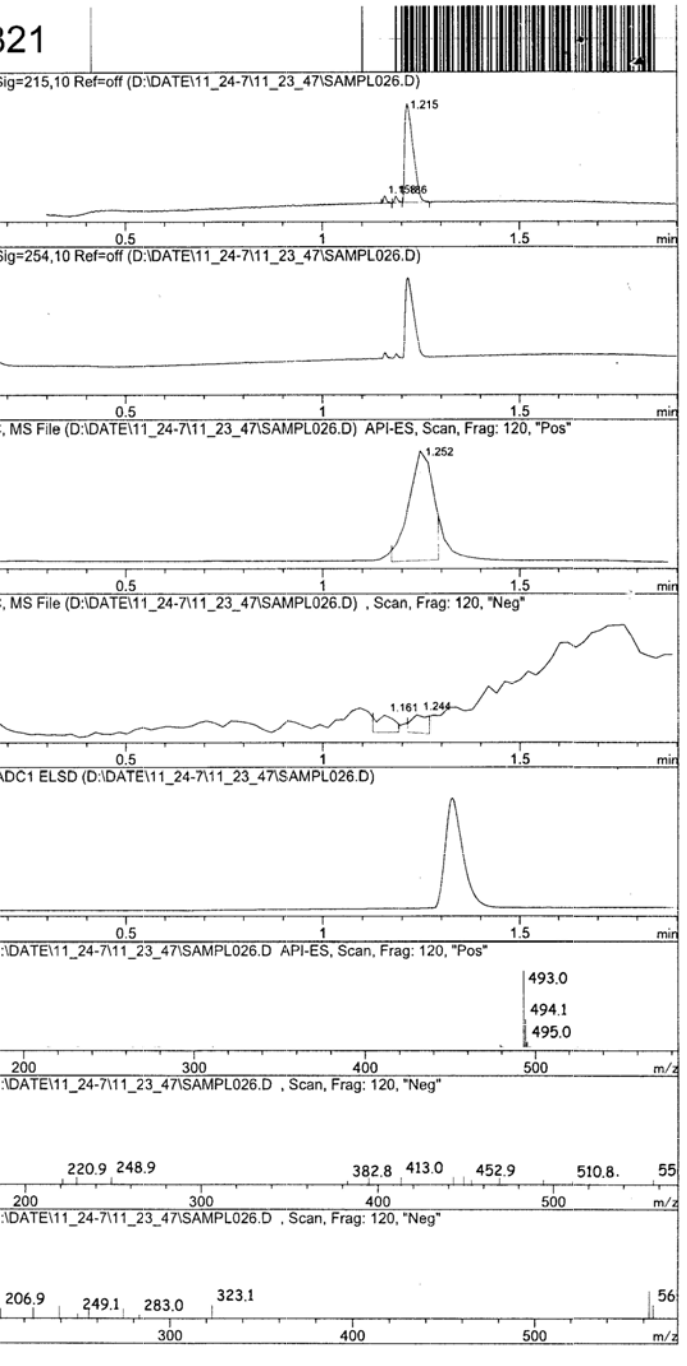


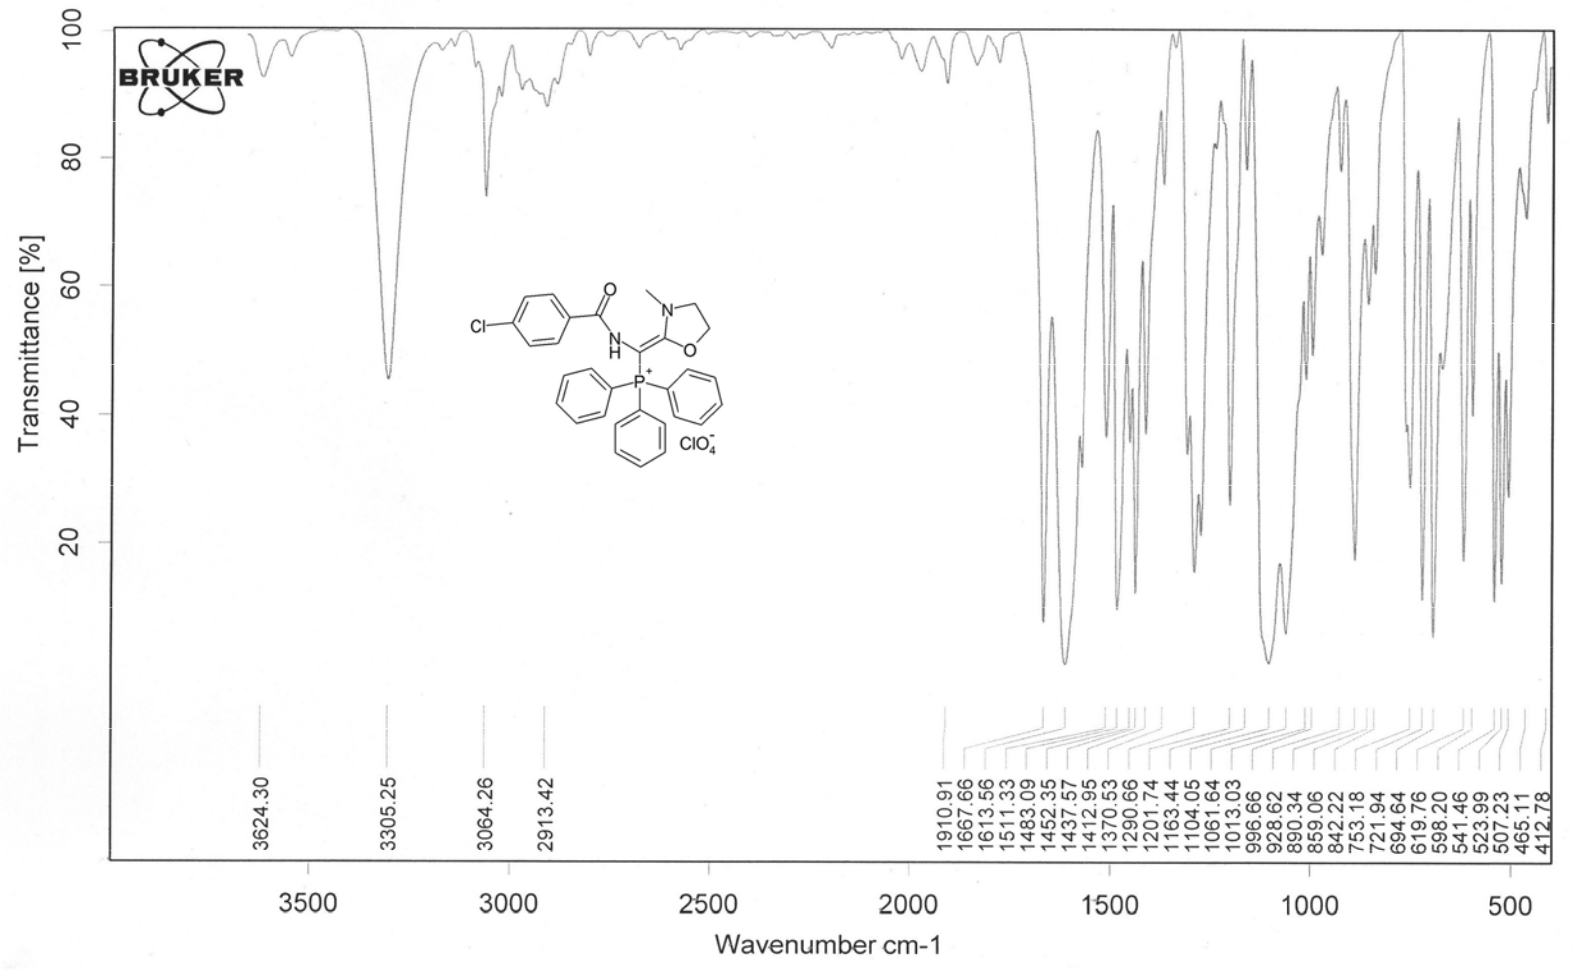


**Figure S 76.** IR (KBr) spectrum of {(4-Chlorobenzoyl)amino-[3-methyl-1,3-oxazolidin-2-y idene]methyl}t iphenylphosphonium perchlorate(**5i**).


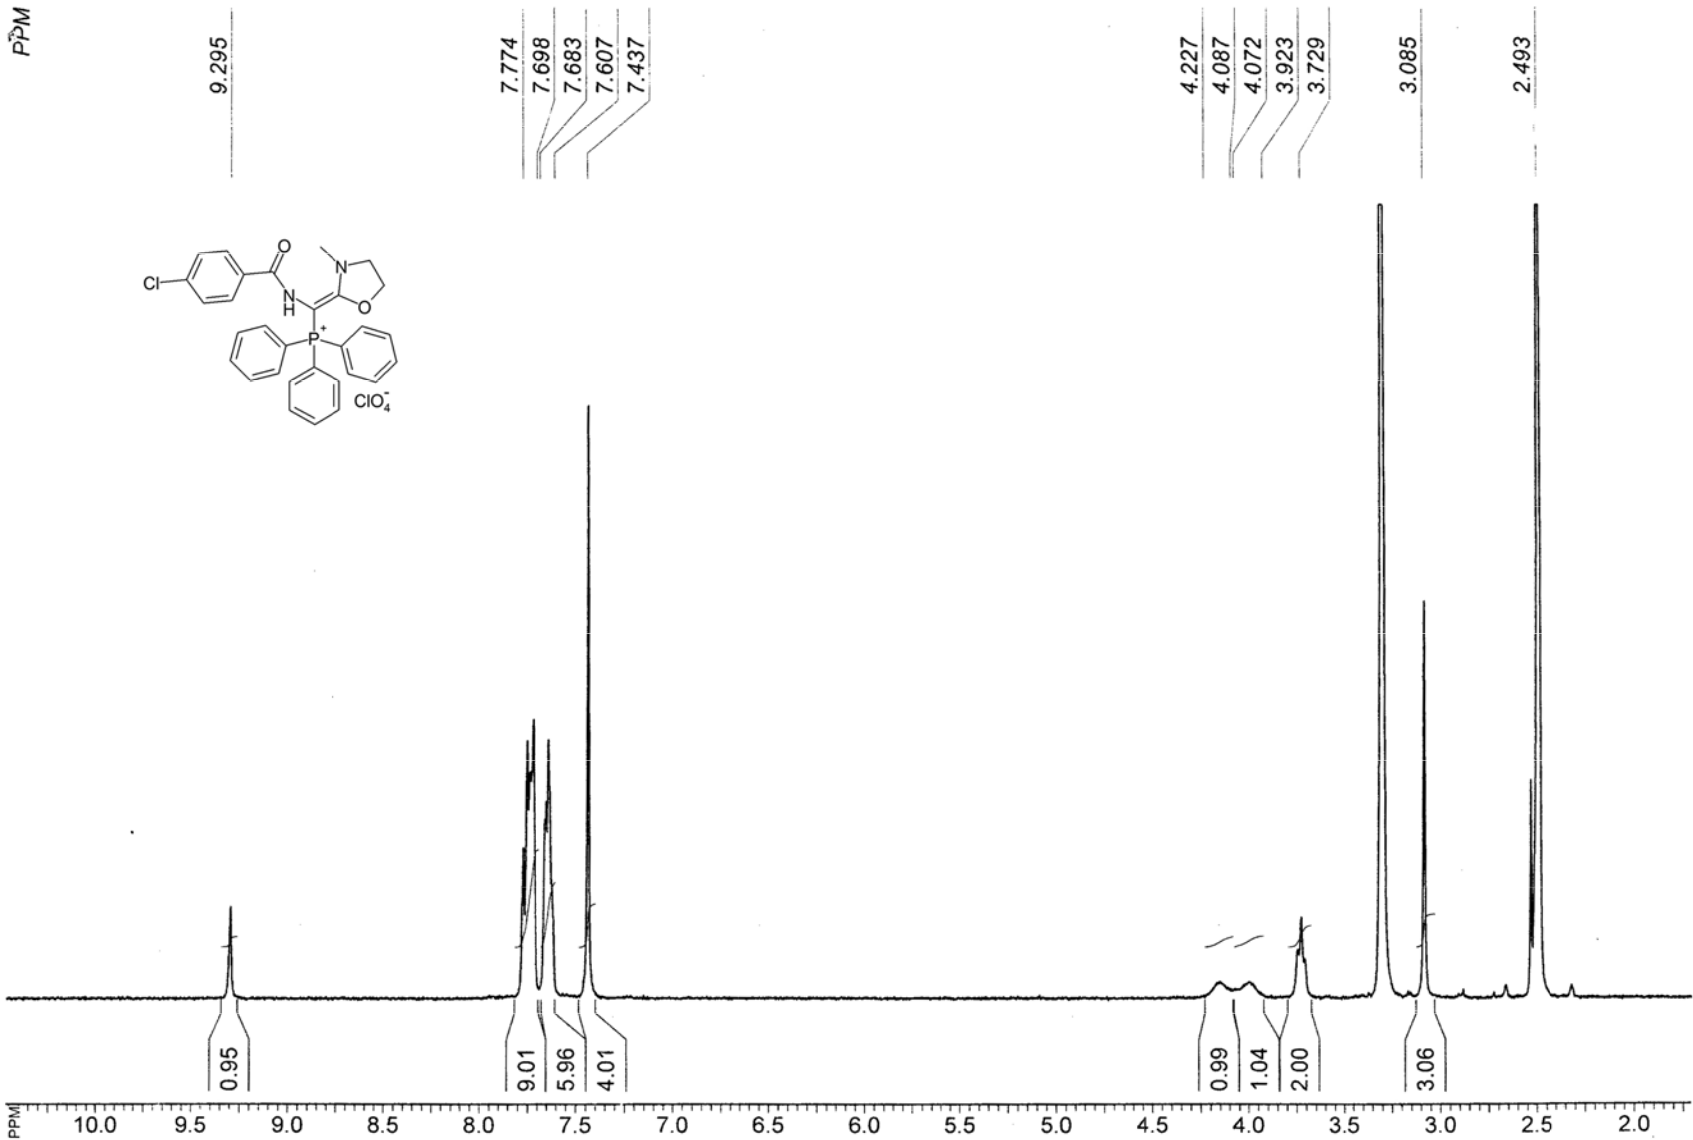


**Figure S 77.** 1H NMR spectrum of{(4-Chlorobenzoyl)amino-[3-methyl-1,3-oxazolidin-2-ylidene] ethyl}triphenylphosphonium perchlorate (**5i**).


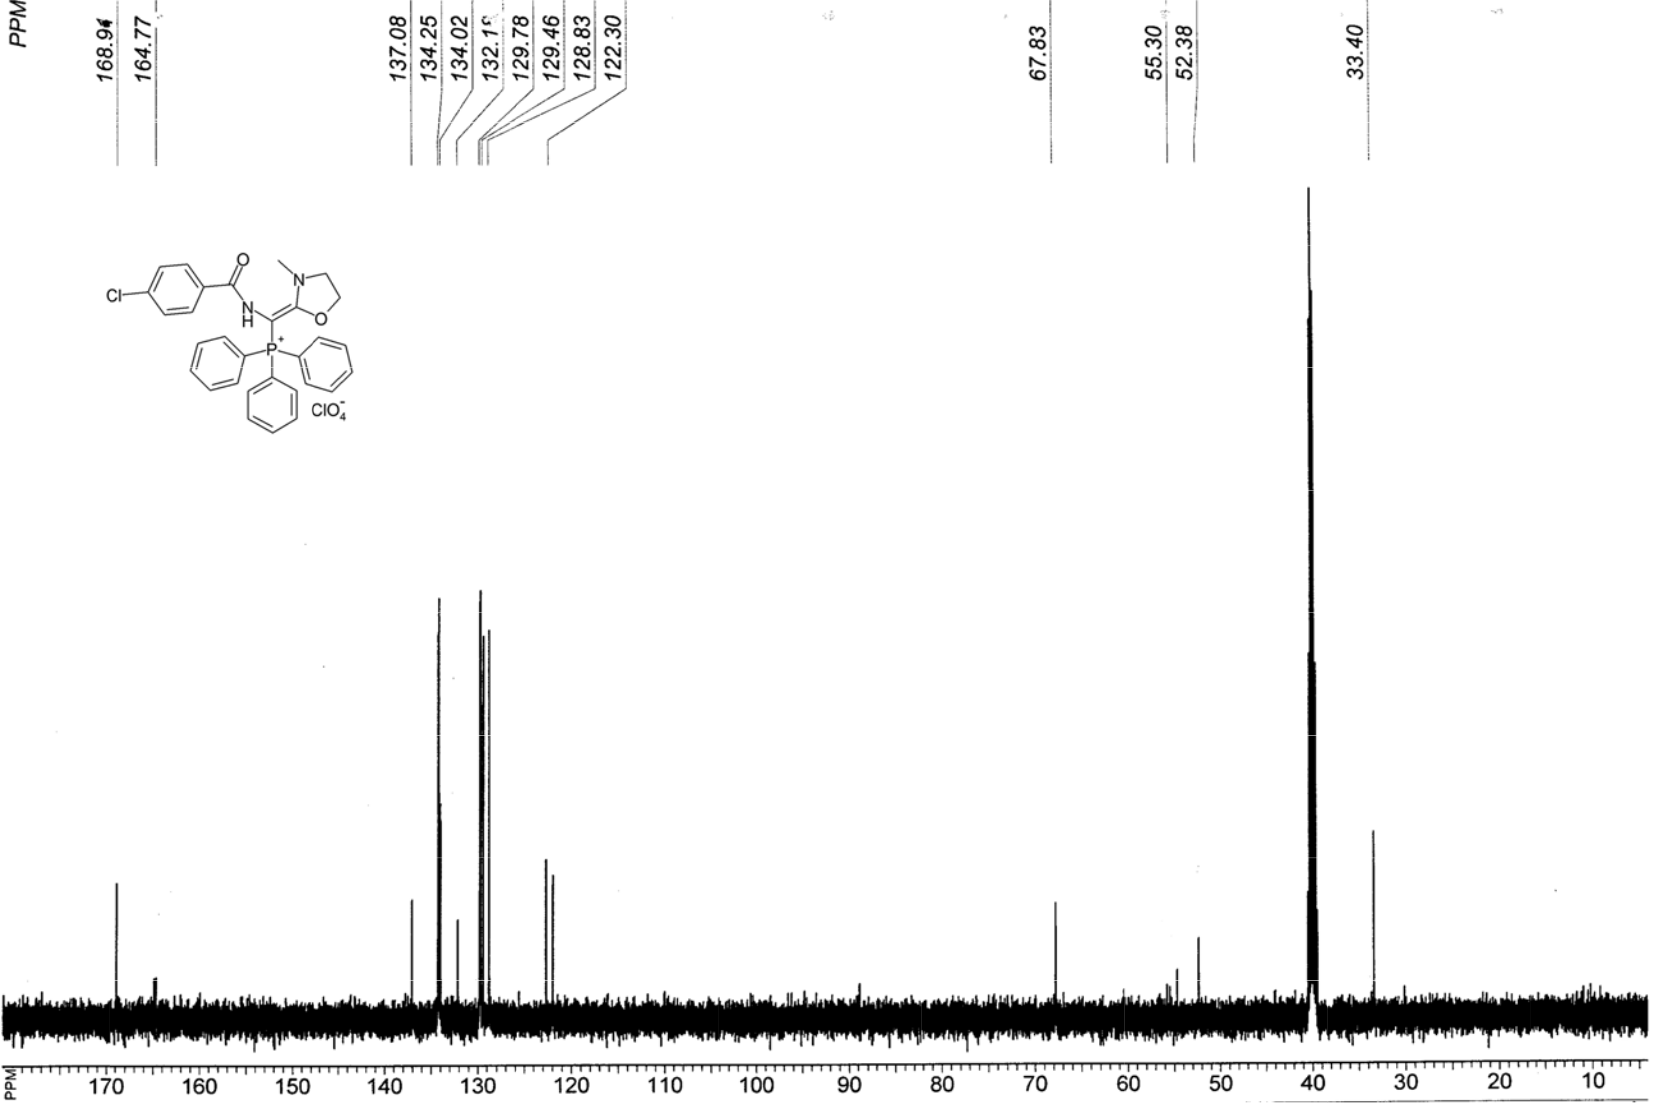


**Figure S 78.** 13C NMR spectrum of {(4-Chlorobenzoyl)amino-[3-methyl-1,3-oxazolidin-2-ylidene]methyl}triphenylphosphonium erchlorate (**5i**).


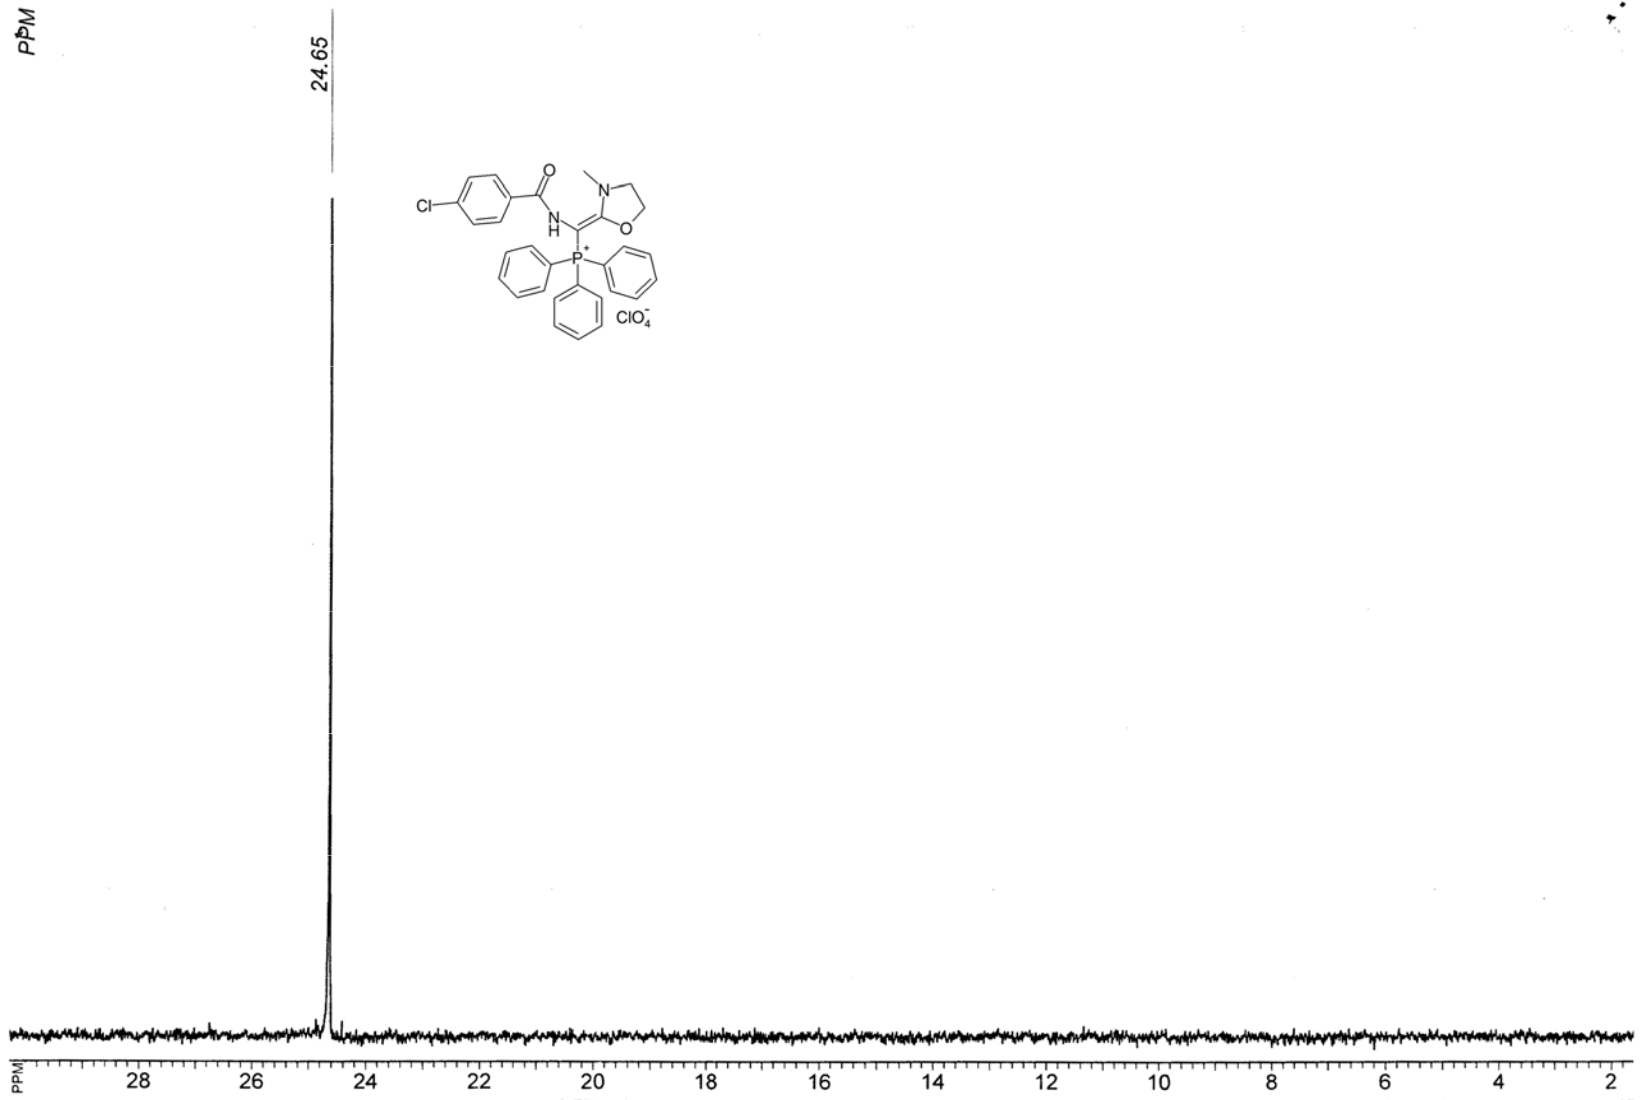


**Figure S 79.** 31P NMR spectrum of{(4-Chlorobenzoyl)amino-[3-methyl-1,3-oxazo idin-2-ylidene]methyl}triphenylphosphoniumperchlorate (**5i**).

**Figu** ylide

**re S 80.** LC-MS analy is report of{(4-Chlorobenzoyl)amino-[3-methyl-1,3-oxazolidin-2-ne]methyl} triphenylp hosphonium perchlorat e (**5i**).


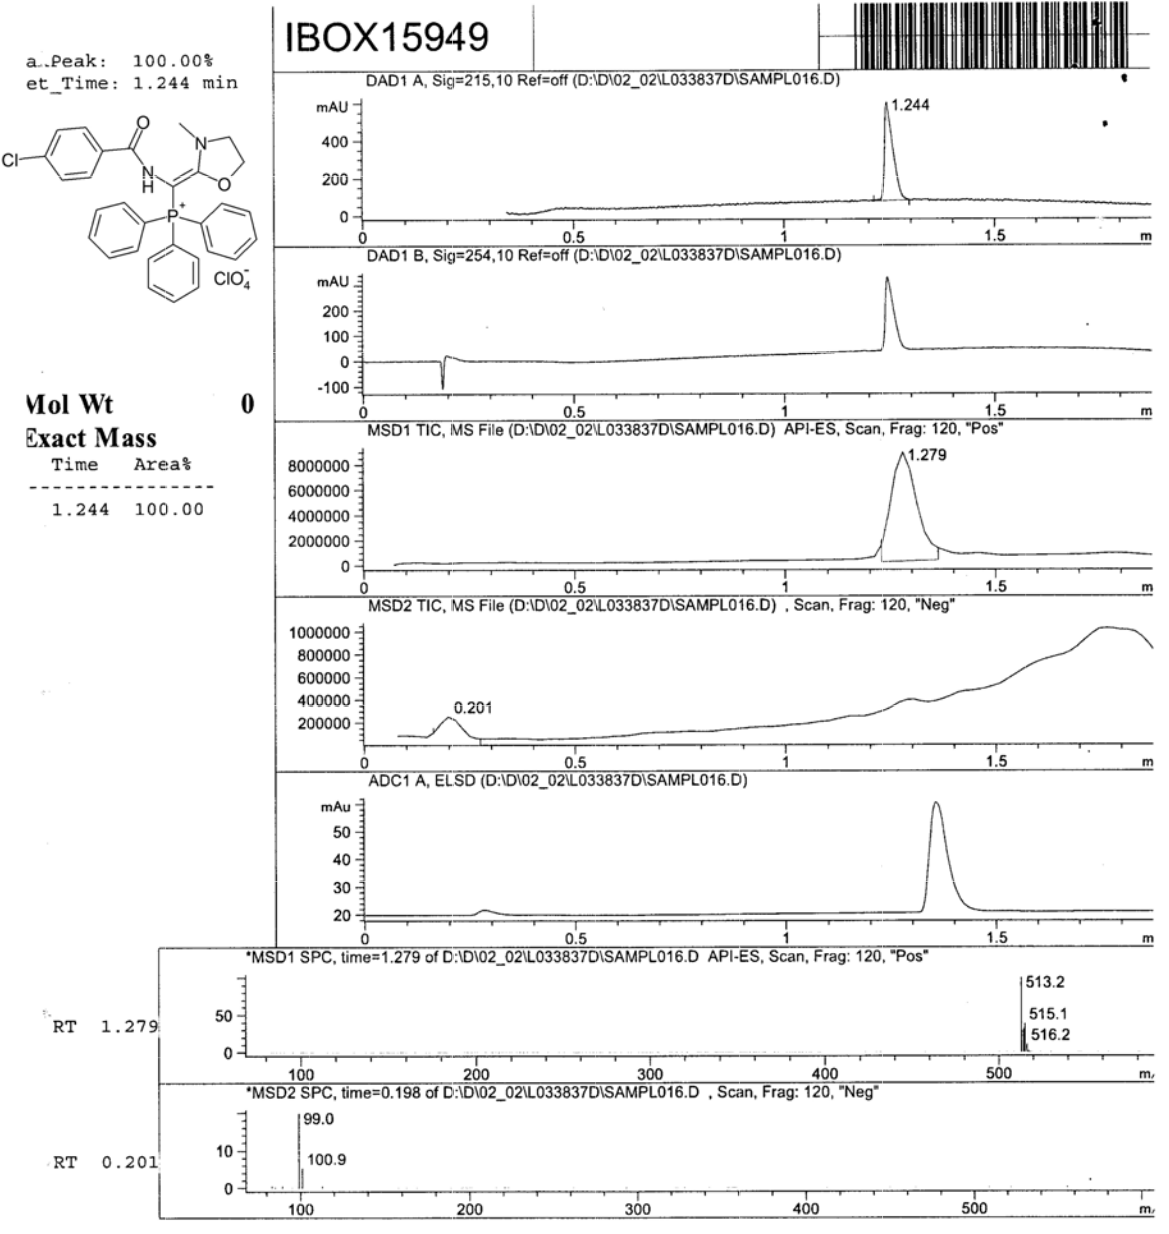

Supplement: Supplementary file 1 [file 22643576]
